# Supplementary material for: Cross-Trait Genetic Analyses Indicate Pleiotropy and Complex Causal Relationships between Headache and Thyroid Function Traits
Source: MDPI journal article supplement (doi:10.3390/genes14010016), 2022-12-21
Supplement: s1 [file s1]

**Supplementary Table S1.** Estimated univariate heritability for headache and thyroid traits using LDSC.

| Trait                              | Sample prevalence (%) | Population prevalence (%) | Cases/Controls  | Valid SNPs | $h^2$ (SE)      | 95% CI       | Intercept (SE)  | Z score | $p$      |
|------------------------------------|-----------------------|---------------------------|-----------------|------------|-----------------|--------------|-----------------|---------|----------|
| Headache (PANUKBB)                 | 20                    | 50                        | 84,036/ 335,552 | 1181077    | 0.0993 (0.0057) | (0.09-0.11)  | 1.0334 (0.0084) | 17.42   | 5.71E-68 |
| Hypothyroidism (PANUKBB)           | 4.9                   | 5.3                       | 20,563/399,910  | 1181077    | 0.2037 (0.0183) | (0.17-0.24)  | 1.0513 (0.0129) | 11.13   | 8.96E-29 |
| Hyperthyroidism (PANUKBB)          | 0.76                  | 1.3                       | 3,197/417,276   | 1181077    | 0.141 (0.0275)  | (0.09-0.19)  | 1.0031 (0.0068) | 5.13    | 2.90E-07 |
| Secondary Hypothyroidism (PANUKBB) | 0.36                  | 0.0013                    | 1,430/399,034   | 1181077    | 0.0407 (0.0188) | (0.004-0.08) | 1.0004 (0.0068) | 2.16    | 3.08E-02 |
| TSH (Teumer et al.)                | NA                    | NA                        | 72,167          | 1166342    | 0.1253 (0.0192) | (0.09-0.16)  | 1.0352 (0.0098) | 6.53    | 6.58E-11 |
| fT4 (Teumer et al.)                | NA                    | NA                        | 72,167          | 1166086    | 0.1514 (0.0162) | (0.12-0.18)  | 1.0137 (0.0078) | 9.35    | 8.76E-21 |

Valid SNPs, number of SNPs used for estimating univariate heritability;  $h^2$ : univariate heritability; CI, Confidence Interval; SE, standard error; Z score, z\_score of univariate  $h^2$  ( $h^2/h^2\_se$ );  $p$ , calculated using R software.

**Supplementary Table S2.** Pleiotropic loci with top significant SNPs influencing headache and hypothyroidism identified by GWAS-PW.

| chunk | NSNP  | chr | st        | sp        | PPA_1                  | PPA_2                 | PPA_3  | PPA_4  | Headache    |    |     |       |                       | Hypothyroidism |       |                        | LD |
|-------|-------|-----|-----------|-----------|------------------------|-----------------------|--------|--------|-------------|----|-----|-------|-----------------------|----------------|-------|------------------------|----|
|       |       |     |           |           |                        |                       |        |        | SNP         | EA | NEA | Beta  | <i>p</i>              | SNP            | Beta  | <i>p</i>               |    |
| 1244  | 8366  | 12  | 109025901 | 110336618 | $3.03 \times 10^{-7}$  | $9.58 \times 10^{-8}$ | 0.9747 | 0.0253 | rs116940627 | T  | C   | −0.07 | $1.09 \times 10^{-7}$ | rs116940627    | −0.12 | $3.77 \times 10^{-6}$  | 1  |
| 649   | 8160  | 6   | 24852296  | 25684555  | $9.22 \times 10^{-11}$ | $9.60 \times 10^{-9}$ | 0.9594 | 0.0406 | rs9295661   | C  | A   | 0.05  | $1.09 \times 10^{-7}$ | rs9295661      | 0.12  | $9.53 \times 10^{-11}$ | 1  |
| 324   | 16101 | 3   | 70449028  | 72529129  | $9.53 \times 10^{-6}$  | $3.15 \times 10^{-8}$ | 0.8513 | 0.1487 | rs115358873 | A  | G   | 0.68  | $7.96 \times 10^{-3}$ | rs115358873    | 0.88  | $5.87 \times 10^{-2}$  | 1  |
| 1124  | 12278 | 11  | 49866050  | 54694395  | $1.26 \times 10^{-5}$  | $2.49 \times 10^{-6}$ | 0.8420 | 0.1579 | rs141313786 | C  | G   | −0.09 | $1.70 \times 10^{-5}$ | rs141313786    | 0.15  | $6.63 \times 10^{-5}$  | 1  |
| 1125  | 2969  | 11  | 54696361  | 55082567  | $1.38 \times 10^{-5}$  | $3.72 \times 10^{-6}$ | 0.7980 | 0.2019 | rs72920604  | T  | C   | −0.08 | $2.12 \times 10^{-5}$ | rs72920604     | 0.13  | $2.90 \times 10^{-4}$  | 1  |
| 1562  | 10525 | 18  | 57630824  | 59020745  | $1.32 \times 10^{-5}$  | $1.66 \times 10^{-5}$ | 0.5792 | 0.4205 | rs768293565 | T  | G   | −0.31 | $1.54 \times 10^{-2}$ | rs768293565    | −0.58 | $1.51 \times 10^{-2}$  | 1  |

chunk, ID representing the LD region; NSNP, number of SNP in the LD region; chr, chromosome; st, start position of the LD region; sp, stop position of the LD region; PPA\_1, estimated posterior probability of model 1 (locus affecting only headache); PPA\_2, estimated posterior probability of model 2 (locus affecting only hypothyroidism); PPA\_3, estimated posterior probability of model 3 (locus affecting both headache and hypothyroidism via a single SNP); PPA\_4, estimated posterior probability of model 4 (locus affecting both headache and hypothyroidism via two different SNPs); SNP, single nucleotide polymorphism; EA, effect allele; NEA, non-effect allele; Beta, effect of association; *p*, p-value; LD, linkage disequilibrium.

**Supplementary Table S3.** Pleiotropic loci with top significant SNPs influencing headache and hyperthyroidism identified by GWAS-PW.

| chunk | NSNP  | chr | st        | sp        | PPA_1                  | PPA_2                  | PPA_3  | PPA_4  | Headache    |    |     |       |                        | Hyperthyroidism |       |                        | LD |
|-------|-------|-----|-----------|-----------|------------------------|------------------------|--------|--------|-------------|----|-----|-------|------------------------|-----------------|-------|------------------------|----|
|       |       |     |           |           |                        |                        |        |        | SNP         | EA | NEA | Beta  | <i>p</i>               | SNP             | Beta  | <i>p</i>               |    |
| 649   | 8160  | 6   | 24852296  | 25684555  | $3.52 \times 10^{-6}$  | $9.07 \times 10^{-9}$  | 0.9938 | 0.0062 | rs9295661   | C  | A   | 0.05  | $1.09 \times 10^{-7}$  | rs9295661       | 0.28  | $7.38 \times 10^{-10}$ | 1  |
| 657   | 8771  | 6   | 32682664  | 33236268  | $7.68 \times 10^{-75}$ | $1.37 \times 10^{-7}$  | 0.9833 | 0.0167 | rs3957147   | T  | C   | -0.03 | $7.40 \times 10^{-6}$  | rs3957147       | -0.69 | $1.71 \times 10^{-83}$ | 1  |
| 652   | 7238  | 6   | 28018246  | 28917525  | $6.99 \times 10^{-28}$ | $9.27 \times 10^{-11}$ | 0.9732 | 0.0268 | rs35949109  | C  | T   | 0.04  | $1.04 \times 10^{-7}$  | rs35949109      | -0.35 | $5.93 \times 10^{-21}$ | 1  |
| 129   | 16175 | 1   | 242071724 | 244108295 | $1.82 \times 10^{-4}$  | $4.23 \times 10^{-8}$  | 0.9663 | 0.0335 | rs12067370  | C  | T   | 0.03  | $1.90 \times 10^{-6}$  | rs12067370      | 0.15  | $1.82 \times 10^{-8}$  | 1  |
| 655   | 15927 | 6   | 30798168  | 31571130  | $1.56 \times 10^{-70}$ | $9.73 \times 10^{-10}$ | 0.9590 | 0.0410 | rs9263610   | C  | T   | -0.05 | $1.02 \times 10^{-8}$  | rs9263610       | -0.66 | $5.21 \times 10^{-66}$ | 1  |
| 650   | 8795  | 6   | 25684587  | 26789690  | $3.73 \times 10^{-16}$ | $1.18 \times 10^{-11}$ | 0.9251 | 0.0749 | rs34493019  | G  | A   | -0.06 | $3.57 \times 10^{-9}$  | rs34493019      | -0.30 | $3.44 \times 10^{-12}$ | 1  |
| 1369  | 8893  | 14  | 93132477  | 94325277  | 0.0306                 | $2.90 \times 10^{-6}$  | 0.8203 | 0.1490 | rs80307714  | A  | G   | 0.88  | $9.42 \times 10^{-3}$  | rs80307714      | -3.08 | $4.39 \times 10^{-2}$  | 1  |
| 1520  | 11698 | 17  | 63148928  | 64799756  | 0.0519                 | $7.03 \times 10^{-5}$  | 0.7976 | 0.1486 | rs185476835 | A  | G   | -0.11 | $4.14 \times 10^{-2}$  | rs185476835     | -0.54 | $2.16 \times 10^{-2}$  | 1  |
| 651   | 9167  | 6   | 26791421  | 28017544  | $1.96 \times 10^{-20}$ | $1.43 \times 10^{-10}$ | 0.7890 | 0.2110 | rs374593247 | T  | G   | -0.06 | $1.91 \times 10^{-11}$ | rs374593247     | -0.36 | $9.68 \times 10^{-18}$ | 1  |
| 5     | 16356 | 1   | 7247335   | 9365093   | 0.0805                 | $7.74 \times 10^{-5}$  | 0.7783 | 0.1377 | rs1775049   | C  | T   | 0.01  | $5.34 \times 10^{-2}$  | rs1775049       | 0.06  | $2.25 \times 10^{-2}$  | 1  |
| 1097  | 9993  | 11  | 3665604   | 4746391   | 0.1346                 | $7.66 \times 10^{-5}$  | 0.7269 | 0.1328 | rs139586069 | A  | C   | -0.09 | $5.00 \times 10^{-3}$  | rs139586069     | -0.34 | $1.57 \times 10^{-2}$  | 1  |
| 656   | 19952 | 6   | 31571330  | 32682590  | $7.56 \times 10^{-94}$ | $4.18 \times 10^{-8}$  | 0.7228 | 0.2772 | rs3130631   | G  | C   | -0.05 | $1.45 \times 10^{-8}$  | rs3130631       | -0.75 | $5.96 \times 10^{-80}$ | 1  |
| 1279  | 5878  | 13  | 46495674  | 47430788  | 0.1489                 | $3.35 \times 10^{-7}$  | 0.6453 | 0.2058 | rs2794661   | C  | T   | -0.03 | $4.64 \times 10^{-4}$  | rs2794661       | 0.07  | $3.21 \times 10^{-2}$  | 1  |
| 278   | 16565 | 3   | 1441779   | 2991923   | 0.2186                 | $1.03 \times 10^{-4}$  | 0.5559 | 0.2177 | rs189475718 | C  | T   | -0.17 | $3.51 \times 10^{-2}$  | rs189475718     | -0.85 | $1.85 \times 10^{-2}$  | 1  |

chunk, ID representing the LD region; NSNP, number of SNP in the LD region; chr, chromosome; st, start position of the LD region; sp, stop position of the LD region; PPA\_1, estimated posterior probability of model 1 (locus affecting only headache); PPA\_2, estimated posterior probability of model 2 (locus affecting only hyperthyroidism); PPA\_3, estimated posterior probability of model 3 (locus affecting both headache and hyperthyroidism via a single SNP); PPA\_4, estimated posterior probability of model 4 (locus affecting both headache and hyperthyroidism via two different SNPs); SNP, single nucleotide polymorphism; EA, effect allele; NEA, non-effect allele; Beta, effect of association; *p*, p-value; LD, linkage disequilibrium.

**Supplementary Table S4.** Pleiotropic loci with top significant SNPs influencing headache and secondary hypothyroidism identified by GWAS-PW.

| chunk | NSNP  | chr | st        | sp        | PPA_1                 | PPA_2                 | PPA_3  | PPA_4  | Headache    |    |     |       |                       | Secondary Hypothyroidism |      |                       | LD |
|-------|-------|-----|-----------|-----------|-----------------------|-----------------------|--------|--------|-------------|----|-----|-------|-----------------------|--------------------------|------|-----------------------|----|
|       |       |     |           |           |                       |                       |        |        | SNP         | EA | NEA | Beta  | <i>p</i>              | SNP                      | Beta | <i>p</i>              |    |
| 656   | 19952 | 6   | 31571330  | 32682590  | $9.68 \times 10^{-5}$ | $4.63 \times 10^{-9}$ | 0.9932 | 0.0067 | rs3130631   | G  | C   | −0.05 | $1.45 \times 10^{-8}$ | rs3130631                | 0.31 | $2.62 \times 10^{-8}$ | 1  |
| 657   | 8771  | 6   | 32682664  | 33236268  | 0.0096                | $6.39 \times 10^{-7}$ | 0.9731 | 0.0173 | rs3957147   | T  | C   | −0.03 | $7.41 \times 10^{-6}$ | rs3957147                | 0.18 | $1.75 \times 10^{-4}$ | 1  |
| 655   | 15927 | 6   | 30798168  | 31571130  | 0.0034                | $4.74 \times 10^{-9}$ | 0.9525 | 0.0440 | rs9263610   | C  | T   | −0.05 | $1.02 \times 10^{-8}$ | rs9263610                | 0.26 | $1.26 \times 10^{-6}$ | 1  |
| 203   | 12688 | 2   | 123302906 | 124732010 | 0.1463                | $8.64 \times 10^{-5}$ | 0.7901 | 0.0621 | rs561716457 | T  | C   | −0.51 | $4.14 \times 10^{-2}$ | rs561716457              | 4.22 | $2.37 \times 10^{-2}$ | 1  |

chunk, ID representing the LD region; NSNP, number of SNP in the LD region; chr, chromosome; st, start position of the LD region; sp, stop position of the LD region; PPA\_1, estimated posterior probability of model 1 (locus affecting only headache); PPA\_2, estimated posterior probability of model 2 (locus affecting only secondary hypothyroidism); PPA\_3, estimated posterior probability of model 3 (locus affecting both headache and secondary hypothyroidism via a single SNP); PPA\_4, estimated posterior probability of model 4 (locus affecting both headache and secondary hypothyroidism via two different SNPs); SNP, single nucleotide polymorphism; EA, effect allele; NEA, non-effect allele; Beta, effect of association; *p*, p-value; LD, linkage disequilibrium.

**Supplementary Table S5.** Pleiotropic loci with top significant SNPs influencing headache and fT4 identified by GWAS-PW.

| chunk | NSNP | chr | st        | sp        | PPA_1                  | PPA_2                 | PPA_3  | PPA_4  | Headache    |    |     |       |                        | fT4         |       |                       | LD |
|-------|------|-----|-----------|-----------|------------------------|-----------------------|--------|--------|-------------|----|-----|-------|------------------------|-------------|-------|-----------------------|----|
|       |      |     |           |           |                        |                       |        |        | SNP         | EA | NEA | Beta  | <i>p</i>               | SNP         | Beta  | <i>p</i>              |    |
| 508   | 6141 | 4   | 170776510 | 172558507 | $5.37 \times 10^{-20}$ | $4.68 \times 10^{-6}$ | 0.9825 | 0.0175 | rs6854291   | A  | G   | 0.12  | $1.30 \times 10^{-24}$ | rs6854291   | 0.05  | $2.19 \times 10^{-6}$ | 1  |
| 654   | 1974 | 6   | 31040488  | 31570931  | 0.0211                 | $1.45 \times 10^{-7}$ | 0.9092 | 0.0697 | rs9263610   | C  | T   | −0.05 | $1.02 \times 10^{-8}$  | rs9263610   | −0.05 | $2.15 \times 10^{-4}$ | 1  |
| 105   | 3745 | 1   | 204681068 | 205921859 | 0.0032                 | 0.0050                | 0.6289 | 0.3609 | rs9438436   | T  | C   | 0.02  | $5.85 \times 10^{-3}$  | rs9438436   | 0.02  | $1.24 \times 10^{-3}$ | 1  |
| 658   | 5908 | 6   | 35455756  | 37572375  | 0.2326                 | 0.0010                | 0.5582 | 0.1123 | rs143000423 | A  | C   | 0.09  | $1.30 \times 10^{-8}$  | rs143000423 | 0.09  | $6.15 \times 10^{-6}$ | 1  |
| 988   | 4181 | 9   | 109298916 | 110694926 | 0.0620                 | 0.0005                | 0.5567 | 0.3770 | rs12343333  | C  | T   | 0.03  | $5.90 \times 10^{-10}$ | rs12343333  | 0.03  | $2.12 \times 10^{-5}$ | 1  |

chunk, ID representing the LD region; NSNP, number of SNP in the LD region; chr, chromosome; st, start position of the LD region; sp, stop position of the LD region; fT4, free thyroxine; PPA\_1, estimated posterior probability of model 1 (locus affecting only headache); PPA\_2, estimated posterior probability of model 2 (locus affecting only fT4); PPA\_3, estimated posterior probability of model 3 (locus affecting both headache and fT4 via a single SNP); PPA\_4, estimated posterior probability of model 4 (locus affecting both headache and fT4 via two different SNPs); SNP, single nucleotide polymorphism; EA, effect allele; NEA, non-effect allele; Beta, effect of association; *p*, p-value; LD, linkage disequilibrium.

**Supplementary Table S6.** Independent gene-based association analysis and gene-based genetic overlap between headache and hyperthyroidism.

**A) Effective number of independent genes in headache and hyperthyroidism**

| Disorder                     | Total genes      |                        | p < 0.1          |                        |                         | p < 0.05         |                        |                         | p < 0.01         |                        |                         |
|------------------------------|------------------|------------------------|------------------|------------------------|-------------------------|------------------|------------------------|-------------------------|------------------|------------------------|-------------------------|
|                              | Raw <sup>3</sup> | Effective <sup>4</sup> | Raw <sup>3</sup> | Effective <sup>4</sup> | Proportion <sup>5</sup> | Raw <sup>3</sup> | Effective <sup>4</sup> | Proportion <sup>5</sup> | Raw <sup>3</sup> | Effective <sup>4</sup> | Proportion <sup>5</sup> |
| Headache <sup>1</sup>        | 33,264           | 22,365                 | 8,107            | 5,381                  | 0.241                   | 5,378            | 3,555                  | 0.159                   | 2,394            | 1,536                  | 0.069                   |
| Hyperthyroidism <sup>2</sup> | 33,264           | 22,094                 | 4,786            | 3,018                  | 0.137                   | 2,708            | 1,710                  | 0.077                   | 984              | 577                    | 0.026                   |

**B) Number of overlapping genes and binomial test p-value for gene-level genetic overlap**

| Discovery set | Target set      | Overlapping genes |           | Proportion of overlap |                     | Binomial test p-value |
|---------------|-----------------|-------------------|-----------|-----------------------|---------------------|-----------------------|
|               |                 | Raw               | Effective | Expected              | Observed            |                       |
| p < 0.1       |                 |                   |           |                       |                     |                       |
| Headache      | Hyperthyroidism | 1,564             | 1,015     | 3,018/22,094= 0.137   | 1,076/7,084 = 0.152 | 4.35E-26              |
| p < 0.05      |                 |                   |           |                       |                     |                       |
| Headache      | Hyperthyroidism | 788               | 483       | 1,710/22,094= 0.077   | 483/3,555= 0.136    | 2.64E-33              |
| p < 0.01      |                 |                   |           |                       |                     |                       |
| Headache      | Hyperthyroidism | 413               | 196       | 577/22,094= 0.026     | 196/1,536= 0.128    | 1.86E-73              |

<sup>1</sup>Headache dataset obtained from PANUK Biobank Neale lab, <sup>2</sup>Hyperthyroidism dataset obtained from PANUK Biobank Neale lab, <sup>3</sup>Raw number of genes (total number of genes obtained in the gene-based association analysis using GATES software), <sup>4</sup>Effective number of independent genes (the total number of independent genes obtained in the independent gene-based test using the ‘genetic type 1 error calculator’ method), <sup>5</sup>Proportion of the total effective number of independent genes.

**Supplementary Table S7.** Independent gene-based association analysis and gene-based genetic overlap between headache and secondary hypothyroidism.

**A) Effective number of independent genes in headache and secondary hypothyroidism**

| Disorder                              | Total genes      |                        | p < 0.1          |                        |                         | p < 0.05         |                        |                         | p < 0.01         |                        |                         |
|---------------------------------------|------------------|------------------------|------------------|------------------------|-------------------------|------------------|------------------------|-------------------------|------------------|------------------------|-------------------------|
|                                       | Raw <sup>3</sup> | Effective <sup>4</sup> | Raw <sup>3</sup> | Effective <sup>4</sup> | Proportion <sup>5</sup> | Raw <sup>3</sup> | Effective <sup>4</sup> | Proportion <sup>5</sup> | Raw <sup>3</sup> | Effective <sup>4</sup> | Proportion <sup>5</sup> |
| Headache <sup>1</sup>                 | 33,264           | 22,365                 | 8,107            | 5,381                  | 0.241                   | 5,378            | 3,555                  | 0.159                   | 2,394            | 1,536                  | 0.069                   |
| Secondary hypothyroidism <sup>2</sup> | 33,264           | 21,965                 | 3,821            | 2,489                  | 0.113                   | 2,074            | 1,375                  | 0.063                   | 581              | 368                    | 0.017                   |

**B) Number of overlapping genes and binomial test p-value for gene-level genetic overlap**

| Discovery set | Target set               | Overlapping genes |           | Proportion of overlap |                  | Binomial test p-value |
|---------------|--------------------------|-------------------|-----------|-----------------------|------------------|-----------------------|
|               |                          | Raw               | Effective | Expected              | Observed         |                       |
| p < 0.1       |                          |                   |           |                       |                  |                       |
| Headache      | Secondary hypothyroidism | 1,099             | 724       | 2,489/21,965= 0.113   | 724/5,381= 0.135 | 6.19E-07              |
| p < 0.05      |                          |                   |           |                       |                  |                       |
| Headache      | Secondary hypothyroidism | 411               | 281       | 1,375/21,965= 0.063   | 281/3,555= 0.079 | 8.05E-05              |
| p < 0.01      |                          |                   |           |                       |                  |                       |
| Headache      | Secondary hypothyroidism | 121               | 70        | 368/21,965= 0.017     | 70/1,536= 0.046  | 4.79E-13              |

<sup>1</sup>Headache dataset obtained from PANUK Biobank Neale lab, <sup>2</sup>Secondary hypothyroidism dataset obtained from PANUK Biobank Neale lab, <sup>3</sup>Raw number of genes (total number of genes obtained in the gene-based association analysis using GATES software), <sup>4</sup>Effective number of independent genes (the total number of independent genes obtained in the independent gene-based test using the ‘genetic type 1 error calculator’ method), <sup>5</sup>Proportion of the total effective number of independent genes.

**Supplementary Table S8.** Independent gene-based association analysis and gene-based genetic overlap between headache and TSH.

**A) Effective number of independent genes in headache and TSH**

| Disorder              | Total genes      |                        | p < 0.1          |                        |                         | p < 0.05         |                        |                         | p < 0.01         |                        |                         |
|-----------------------|------------------|------------------------|------------------|------------------------|-------------------------|------------------|------------------------|-------------------------|------------------|------------------------|-------------------------|
|                       | Raw <sup>3</sup> | Effective <sup>4</sup> | Raw <sup>3</sup> | Effective <sup>4</sup> | Proportion <sup>5</sup> | Raw <sup>3</sup> | Effective <sup>4</sup> | Proportion <sup>5</sup> | Raw <sup>3</sup> | Effective <sup>4</sup> | Proportion <sup>5</sup> |
| Headache <sup>1</sup> | 32,029           | 23,957                 | 7,475            | 5,267                  | 0.22                    | 5,242            | 3,625                  | 0.151                   | 2,447            | 1,604                  | 0.067                   |
| TSH <sup>2</sup>      | 32,029           | 23,895                 | 4,484            | 3,255                  | 0.136                   | 2,814            | 2,032                  | 0.085                   | 978              | 712                    | 0.03                    |

**B) Number of overlapping genes and binomial test p-value for gene-level genetic overlap**

| Discovery set | Target set | Overlapping genes |           | Proportion of overlap |                  | Binomial test p-value |
|---------------|------------|-------------------|-----------|-----------------------|------------------|-----------------------|
|               |            | Raw               | Effective | Expected              | Observed         |                       |
| p < 0.1       |            |                   |           |                       |                  |                       |
| Headache      | TSH        | 1,250             | 915       | 3,255/23,895= 0.136   | 915/5,267= 0.174 | 7.09E-15              |
| p < 0.05      |            |                   |           |                       |                  |                       |
| Headache      | TSH        | 618               | 456       | 2,032/23,895= 0.085   | 456/3,625= 0.126 | 7.68E-01              |
| p < 0.01      |            |                   |           |                       |                  |                       |
| Headache      | TSH        | 186               | 120       | 712/23,895= 0.03      | 120/1,604= 0.075 | 4.42E-19              |

<sup>1</sup>Headache dataset obtained from PANUK Biobank Neale lab, <sup>2</sup>TSH dataset obtained from Teumer et al., <sup>3</sup>Raw number of genes (total number of genes obtained in the gene-based association analysis using GATES software), <sup>4</sup>Effective number of independent genes (the total number of independent genes obtained in the independent gene-based test using the ‘genetic type 1 error calculator’ method), <sup>5</sup>Proportion of the total effective number of independent genes.



**Supplementary Table S9.** Independent gene-based association analysis and gene-based genetic overlap between headache and fT4.

**A) Effective number of independent genes in headache and fT4**

| Disorder              | Total genes      |                        | p < 0.1          |                        |                         | p < 0.05         |                        |                         | p < 0.01         |                        |                         |
|-----------------------|------------------|------------------------|------------------|------------------------|-------------------------|------------------|------------------------|-------------------------|------------------|------------------------|-------------------------|
|                       | Raw <sup>3</sup> | Effective <sup>4</sup> | Raw <sup>3</sup> | Effective <sup>4</sup> | Proportion <sup>5</sup> | Raw <sup>3</sup> | Effective <sup>4</sup> | Proportion <sup>5</sup> | Raw <sup>3</sup> | Effective <sup>4</sup> | Proportion <sup>5</sup> |
| Headache <sup>1</sup> | 31,933           | 23,919                 | 7,427            | 5,239                  | 0.219                   | 5,180            | 3,595                  | 0.150                   | 2,421            | 1,593                  | 0.067                   |
| fT4 <sup>2</sup>      | 31,933           | 23,866                 | 5,054            | 3,634                  | 0.152                   | 3,189            | 2,233                  | 0.094                   | 1,090            | 754                    | 0.032                   |

**B) Number of overlapping genes and binomial test p-value for gene-level genetic overlap**

| Discovery set | Target set | Overlapping genes |           | Proportion of overlap |                  | Binomial test p-value |
|---------------|------------|-------------------|-----------|-----------------------|------------------|-----------------------|
|               |            | Raw               | Effective | Expected              | Observed         |                       |
| p < 0.1       |            |                   |           |                       |                  |                       |
| Headache      | fT4        | 1,399             | 991       | 3,634/23,866= 0.152   | 991/5,239= 0.190 | 2.06E-13              |
| p < 0.05      |            |                   |           |                       |                  |                       |
| Headache      | fT4        | 743               | 494       | 2,233/23,866= 0.094   | 494/3,595= 0.137 | 2.56E-17              |
| p < 0.01      |            |                   |           |                       |                  |                       |
| Headache      | fT4        | 246               | 146       | 754/23,866= 0.032     | 146/1,593= 0.092 | 9.11E-29              |

<sup>1</sup>Headache dataset obtained from PANUK Biobank Neale lab, <sup>2</sup>fT4 dataset obtained from Teumer et al., <sup>3</sup>Raw number of genes (total number of genes obtained in the gene-based association analysis using GATES software), <sup>4</sup>Effective number of independent genes (the total number of independent genes obtained in the independent gene-based test using the ‘genetic type 1 error calculator’ method), <sup>5</sup>Proportion of the total effective number of independent genes.

**Supplementary Table S10.** Genes overlapping headache and hypothyroidism at  $p < 0.05$  and Fisher combined p-value ( $p_{\text{FCP}} < 2.09 \times 10^{-6}$ ).

| Chr | Gene.id          | Name                | Start     | End       | SNP.id      | SNP.pos   | pval(headache) | pval(hypoPAN) | X <sup>2</sup> ,4df | FCP         |
|-----|------------------|---------------------|-----------|-----------|-------------|-----------|----------------|---------------|---------------------|-------------|
| 6   | GeneID:3117      | <i>HLA-DQA1</i>     | 32605183  | 32611429  | rs9272729   | 32609594  | 4.50E-05       | 1.36E-163     | 770.0444066         | 2.3637E-165 |
| 6   | GeneID:3119      | <i>HLA-DQB1</i>     | 32627657  | 32634466  | rs1130389   | 32632627  | 1.09E-05       | 1.61E-144     | 685.0340201         | 6.0632E-147 |
| 6   | GeneID:29113     | <i>C6orf15</i>      | 31079000  | 31080332  | rs2233980   | 31079644  | 9.56E-07       | 1.12E-142     | 681.4349883         | 3.647E-146  |
| 6   | GeneID:1041      | <i>CDSN</i>         | 31082865  | 31088252  | rs2233980   | 31079644  | 1.09E-06       | 1.28E-142     | 680.8952914         | 4.773E-146  |
| 6   | GeneID:170679    | <i>PSORS1C1</i>     | 31082608  | 31107869  | rs2233980   | 31079644  | 1.44E-06       | 1.68E-142     | 679.801353          | 8.2345E-146 |
| 12  | GeneID:10019     | <i>SH2B3</i>        | 111843752 | 111889427 | rs3184504   | 111884608 | 3.36E-03       | 2.50E-93      | 437.8410411         | 1.84626E-93 |
| 12  | GeneID:6311      | <i>ATXN2</i>        | 111890018 | 112037480 | rs3184504   | 111884608 | 5.06E-03       | 4.42E-93      | 435.881299          | 4.89672E-93 |
| 12  | GeneID:100101246 | <i>LOC100101246</i> | 112019098 | 112019749 | rs653178    | 112007756 | 6.74E-03       | 4.58E-92      | 430.6346376         | 6.66757E-92 |
| 12  | GeneID:642580    | <i>LOC642580</i>    | 111819590 | 111823484 | rs10849943  | 111819589 | 3.03E-03       | 5.39E-82      | 385.8537979         | 3.16629E-82 |
| 6   | GeneID:3127      | <i>HLA-DRB5</i>     | 32485151  | 32498006  | rs115250958 | 32509842  | 3.77E-05       | 2.42E-78      | 377.8070808         | 1.73288E-80 |
| 6   | GeneID:3128      | <i>HLA-DRB6</i>     | 32520490  | 32527779  | rs115250958 | 32509842  | 3.81E-05       | 2.75E-78      | 377.5319214         | 1.98702E-80 |
| 6   | GeneID:170680    | <i>PSORS1C2</i>     | 31105311  | 31107127  | rs3130557   | 31094703  | 2.78E-06       | 9.99E-76      | 370.972594          | 5.18766E-79 |
| 6   | GeneID:54535     | <i>CCHCR1</i>       | 31110216  | 31126015  | rs3132541   | 31098734  | 4.22E-06       | 9.07E-76      | 370.3337079         | 7.12786E-79 |
| 12  | GeneID:8315      | <i>BRAP</i>         | 112079950 | 112123790 | rs601663    | 112123284 | 1.06E-03       | 5.56E-73      | 346.4537471         | 1.02244E-73 |
| 12  | GeneID:217       | <i>ALDH2</i>        | 112204691 | 112247789 | rs737280    | 112194976 | 4.04E-04       | 5.08E-71      | 339.3463108         | 3.49986E-72 |
| 6   | GeneID:3106      | <i>HLA-B</i>        | 31321649  | 31324989  | rs2523593   | 31326703  | 1.14E-06       | 2.99E-68      | 338.3279385         | 5.80616E-72 |
| 12  | GeneID:80724     | <i>ACAD10</i>       | 112123857 | 112194911 | rs737280    | 112194976 | 5.48E-04       | 6.90E-71      | 338.1223397         | 6.4309E-72  |
| 6   | GeneID:729816    | <i>DHFRP2</i>       | 31331244  | 31334742  | rs2523593   | 31326703  | 1.22E-06       | 3.18E-68      | 338.0754086         | 6.58268E-72 |
| 12  | GeneID:51275     | <i>C12orf47</i>     | 112277573 | 112280706 | rs7137386   | 112283914 | 5.36E-04       | 4.58E-68      | 325.1718007         | 4.01408E-69 |
| 12  | GeneID:8550      | <i>MAPKAPK5</i>     | 112280279 | 112331228 | rs7309970   | 112312368 | 8.49E-04       | 8.16E-68      | 323.0964509         | 1.12585E-68 |
| 12  | GeneID:283450    | <i>C12orf51</i>     | 112597992 | 112819896 | rs7978523   | 112795744 | 1.38E-03       | 2.28E-66      | 315.4717536         | 4.9757E-67  |
| 12  | GeneID:10906     | <i>TRAFD1</i>       | 112563349 | 112591408 | rs17630235  | 112591686 | 6.17E-03       | 1.23E-66      | 313.6976727         | 1.20132E-66 |
| 12  | GeneID:6128      | <i>RPL6</i>         | 112842994 | 112847443 | rs3759377   | 112848570 | 4.27E-04       | 2.24E-65      | 313.2418582         | 1.50664E-66 |
| 12  | GeneID:5781      | <i>PTPN11</i>       | 112856536 | 112947717 | rs3759377   | 112848570 | 1.05E-03       | 2.94E-65      | 310.9000957         | 4.82256E-66 |
| 12  | GeneID:100500889 | <i>MIR3657</i>      | 112475403 | 112475519 | rs4767296   | 112463366 | 2.65E-04       | 1.33E-63      | 306.0300468         | 5.41979E-65 |
| Chr | Gene.id          | Name                | Start     | End       | SNP.id      | SNP.pos   | pval(headache) | pval(hypoPAN) | X <sup>2</sup> ,4df | FCP         |

| 12  | GeneID:80018     | <i>NAA25</i>        | 112464493 | 112546635 | rs4767296   | 112463366 | 6.72E-04       | 4.28E-63      | 301.8271485         | 4.37184E-64 |
|-----|------------------|---------------------|-----------|-----------|-------------|-----------|----------------|---------------|---------------------|-------------|
| 6   | GeneID:6890      | <i>TAP1</i>         | 32812986  | 32821748  | rs45506201  | 32808299  | 9.10E-06       | 1.48E-59      | 294.134729          | 1.99487E-62 |
| 6   | GeneID:100507463 | <i>LOC100507463</i> | 32811863  | 32814277  | rs45506201  | 32808299  | 9.66E-06       | 1.57E-59      | 293.8971336         | 2.2447E-62  |
| 6   | GeneID:5696      | <i>PSMB8</i>        | 32808494  | 32812712  | rs45506201  | 32808299  | 1.03E-05       | 1.68E-59      | 293.6215515         | 2.57393E-62 |
| 6   | GeneID:6891      | <i>TAP2</i>         | 32789610  | 32806547  | rs45506201  | 32808299  | 1.35E-05       | 2.20E-59      | 292.552821          | 4.37618E-62 |
| 6   | GeneID:1589      | <i>CYP21A2</i>      | 32006093  | 32009447  | rs433061    | 32014828  | 1.77E-07       | 2.26E-55      | 282.7501709         | 5.68872E-60 |
| 6   | GeneID:3112      | <i>HLA-DOB</i>      | 32780540  | 32784825  | rs241437    | 32797684  | 4.26E-03       | 3.18E-59      | 280.3084544         | 1.91199E-59 |
| 6   | GeneID:7148      | <i>TNXB</i>         | 32008932  | 32077151  | rs1269852   | 32080191  | 3.04E-07       | 4.85E-55      | 280.1373599         | 2.0815E-59  |
| 6   | GeneID:721       | <i>C4B</i>          | 31982572  | 32003195  | rs433061    | 32014828  | 1.16E-07       | 1.34E-49      | 257.0073044         | 2.01305E-54 |
| 6   | GeneID:100287272 | <i>USP8P1</i>       | 31243351  | 31246528  | rs9264490   | 31232578  | 5.11E-05       | 1.68E-50      | 248.9848815         | 1.07705E-52 |
| 6   | GeneID:3107      | <i>HLA-C</i>        | 31236529  | 31239855  | rs1793890   | 31222056  | 6.16E-05       | 2.45E-50      | 247.8576796         | 1.88387E-52 |
| 6   | GeneID:5491      | <i>PPIAP9</i>       | 31486754  | 31488108  | rs3130614   | 31476458  | 2.59E-07       | 3.05E-47      | 244.5479389         | 9.7266E-52  |
| 6   | GeneID:4277      | <i>MICB</i>         | 31465855  | 31478901  | rs3130614   | 31476458  | 4.11E-07       | 4.84E-47      | 242.6955967         | 2.43734E-51 |
| 6   | GeneID:80736     | <i>SLC44A4</i>      | 31830969  | 31846823  | rs501942    | 31840477  | 4.53E-07       | 1.51E-45      | 235.6251009         | 8.11936E-50 |
| 6   | GeneID:10919     | <i>EHMT2</i>        | 31847536  | 31865464  | rs501942    | 31840477  | 4.78E-07       | 1.59E-45      | 235.4148971         | 9.0112E-50  |
| 6   | GeneID:5698      | <i>PSMB9</i>        | 32821938  | 32827628  | rs45506201  | 32808299  | 5.28E-06       | 1.58E-45      | 230.6224482         | 9.69602E-49 |
| 6   | GeneID:4758      | <i>NEU1</i>         | 31826829  | 31830709  | rs501942    | 31840477  | 5.11E-07       | 1.32E-43      | 226.4342052         | 7.7298E-48  |
| 6   | GeneID:100129921 | <i>RPL15P4</i>      | 31495853  | 31496498  | rs114751021 | 31504194  | 6.52E-03       | 2.07E-47      | 225.0577811         | 1.52908E-47 |
| 6   | GeneID:401251    | <i>C6orf26</i>      | 31730773  | 31732627  | rs3130484   | 31715882  | 2.01E-07       | 5.56E-38      | 202.4067876         | 1.14127E-42 |
| 6   | GeneID:1192      | <i>CLIC1</i>        | 31698358  | 31704341  | rs3130484   | 31715882  | 2.25E-07       | 6.21E-38      | 201.9623813         | 1.42215E-42 |
| 6   | GeneID:80740     | <i>LY6G6C</i>       | 31686425  | 31689510  | rs3131383   | 31704294  | 1.48E-07       | 9.52E-38      | 201.948745          | 1.43179E-42 |
| 6   | GeneID:100532732 | <i>MSH5-C6orf26</i> | 31707725  | 31732627  | rs3130484   | 31715882  | 3.09E-07       | 8.55E-38      | 200.6825681         | 2.67991E-42 |
| 6   | GeneID:80739     | <i>C6orf25</i>      | 31691121  | 31694487  | rs3101018   | 31705864  | 1.77E-07       | 1.54E-37      | 200.621343          | 2.76238E-42 |
| 6   | GeneID:23564     | <i>DDAH2</i>        | 31694817  | 31698039  | rs3132445   | 31712196  | 2.03E-07       | 1.78E-37      | 200.0578684         | 3.65117E-42 |
| 6   | GeneID:100302242 | <i>MIR1236</i>      | 31924616  | 31924717  | rs1270942   | 31918860  | 1.43E-07       | 6.38E-37      | 198.2060464         | 9.13169E-42 |
| 6   | GeneID:7936      | <i>RDBP</i>         | 31919864  | 31926864  | rs1270942   | 31918860  | 1.48E-07       | 6.61E-37      | 198.0646404         | 9.79378E-42 |
| 6   | GeneID:80737     | <i>C6orf27</i>      | 31733371  | 31745108  | rs3117573   | 31718396  | 2.15E-07       | 4.62E-37      | 198.0320305         | 9.95315E-42 |
| 6   | GeneID:6499      | <i>SKIV2L</i>       | 31926581  | 31937532  | rs1270942   | 31918860  | 1.75E-07       | 7.81E-37      | 197.3940114         | 1.36495E-41 |
| Chr | Gene.id          | Name                | Start     | End       | SNP.id      | SNP.pos   | pval(headache) | pval(hypoPAN) | X <sup>2</sup> ,4df | FCP         |

| 6   | GeneID:629       | <i>CFB</i>             | 31913721  | 31919861  | rs1270942   | 31918860  | 1.76E-07       | 7.86E-37      | 197.3711651         | 1.38047E-41 |
|-----|------------------|------------------------|-----------|-----------|-------------|-----------|----------------|---------------|---------------------|-------------|
| 6   | GeneID:717       | <i>C2</i>              | 31868776  | 31913449  | rs1270942   | 31918860  | 2.79E-07       | 1.18E-36      | 195.6356941         | 3.259E-41   |
| 6   | GeneID:1388      | <i>ATF6B</i>           | 32083045  | 32096017  | rs1269852   | 32080191  | 1.64E-07       | 3.69E-36      | 194.4199555         | 5.94838E-41 |
| 6   | GeneID:4049      | <i>LTA</i>             | 31539876  | 31542098  | rs1800628   | 31546850  | 1.76E-07       | 9.69E-36      | 192.3524362         | 1.65485E-40 |
| 6   | GeneID:259197    | <i>NCR3</i>            | 31556660  | 31560762  | rs1800628   | 31546850  | 1.79E-07       | 9.88E-36      | 192.2758059         | 1.71881E-40 |
| 6   | GeneID:7124      | <i>TNF</i>             | 31543350  | 31546112  | rs1800628   | 31546850  | 1.86E-07       | 1.02E-35      | 192.1346136         | 1.8432E-40  |
| 6   | GeneID:7940      | <i>LST1</i>            | 31553956  | 31556686  | rs1800628   | 31546850  | 1.90E-07       | 1.05E-35      | 192.039511          | 1.93201E-40 |
| 6   | GeneID:4050      | <i>LTB</i>             | 31548335  | 31550202  | rs1800628   | 31546850  | 1.92E-07       | 1.06E-35      | 192.0069724         | 1.96337E-40 |
| 6   | GeneID:100287329 | <i>LOC100287329</i>    | 31527348  | 31540474  | rs1800628   | 31546850  | 2.48E-07       | 1.02E-35      | 191.5665469         | 2.44148E-40 |
| 6   | GeneID:692233    | <i>SNORD117</i>        | 31504151  | 31504226  | rs9267488   | 31514247  | 6.99E-07       | 6.73E-36      | 190.318507          | 4.52744E-40 |
| 6   | GeneID:3305      | <i>HSPA1L</i>          | 31777396  | 31782835  | rs1043618   | 31783507  | 7.84E-04       | 6.41E-39      | 190.1877827         | 4.82996E-40 |
| 6   | GeneID:3303      | <i>HSPA1A</i>          | 31783291  | 31785719  | rs1043618   | 31783507  | 8.06E-04       | 6.59E-39      | 190.0761108         | 5.10435E-40 |
| 6   | GeneID:692199    | <i>SNORD84</i>         | 31508878  | 31508955  | rs9267488   | 31514247  | 8.34E-07       | 8.04E-36      | 189.6116556         | 6.42309E-40 |
| 6   | GeneID:57819     | <i>LSM2</i>            | 31765173  | 31774743  | rs1043618   | 31783507  | 9.25E-04       | 7.57E-39      | 189.5239918         | 6.70782E-40 |
| 6   | GeneID:534       | <i>ATP6V1G2</i>        | 31512228  | 31514625  | rs9267488   | 31514247  | 8.95E-07       | 8.63E-36      | 189.3287935         | 7.38797E-40 |
| 6   | GeneID:100532737 | <i>ATP6V1G2-DDX39B</i> | 31497996  | 31514625  | rs9267488   | 31514247  | 1.00E-06       | 9.65E-36      | 188.8815388         | 9.21783E-40 |
| 6   | GeneID:4795      | <i>NFKBIL1</i>         | 31514628  | 31526606  | rs9267488   | 31514247  | 1.10E-06       | 1.06E-35      | 188.50989           | 1.10786E-39 |
| 6   | GeneID:100131609 | <i>HNRNPA1P2</i>       | 32293175  | 32294298  | rs116667074 | 32285362  | 7.28E-06       | 2.83E-36      | 187.3662486         | 1.95078E-39 |
| 6   | GeneID:10665     | <i>C6orf10</i>         | 32260475  | 32339656  | rs116667074 | 32285362  | 1.46E-05       | 5.69E-36      | 184.5717562         | 7.77264E-39 |
| 6   | GeneID:7407      | <i>VARS</i>            | 31745295  | 31763712  | rs2075800   | 31777946  | 4.51E-02       | 6.53E-39      | 182.0443573         | 2.71308E-38 |
| 6   | GeneID:116935    | <i>RPL3P2</i>          | 31248068  | 31249348  | rs114203148 | 31260364  | 3.97E-02       | 1.14E-32      | 153.5643523         | 3.50594E-32 |
| 6   | GeneID:3304      | <i>HSPA1B</i>          | 31795512  | 31798031  | rs1043618   | 31783507  | 6.14E-04       | 3.89E-30      | 150.2313464         | 1.81615E-31 |
| 12  | GeneID:144717    | <i>FAM109A</i>         | 111798455 | 111806925 | rs10849943  | 111819589 | 3.13E-03       | 7.93E-30      | 145.5468124         | 1.83152E-30 |
| 12  | GeneID:10961     | <i>ERP29</i>           | 112451152 | 112461024 | rs4767296   | 112463366 | 3.44E-04       | 3.59E-28      | 142.3398006         | 8.90556E-30 |
| 12  | GeneID:89894     | <i>TMEM116</i>         | 112369086 | 112451023 | rs4767296   | 112463366 | 6.69E-04       | 2.98E-28      | 141.3812057         | 1.42864E-29 |
| 12  | GeneID:100420505 | <i>LOC100420505</i>    | 112364998 | 112366738 | rs11066085  | 112355949 | 3.53E-03       | 1.61E-28      | 139.2925284         | 4.00038E-29 |
| 6   | GeneID:100507679 | <i>MUC22</i>           | 30973729  | 31003179  | rs141725002 | 30971976  | 3.36E-02       | 3.55E-27      | 128.5962206         | 7.77295E-27 |
| 6   | GeneID:387122    | <i>WASF5P</i>          | 31255162  | 31256941  | rs114203148 | 31260364  | 2.36E-02       | 7.70E-26      | 123.1470539         | 1.13592E-25 |
| Chr | Gene.id          | Name                   | Start     | End       | SNP.id      | SNP.pos   | pval(headache) | pval(hypoPAN) | X <sup>2</sup> ,4df | FCP         |

| 6   | GeneID:401250    | <i>MCCD1</i>        | 31496739  | 31498008  | rs114751021 | 31504194  | 6.50E-03       | 3.16E-25      | 122.8998219         | 1.28285E-25 |
|-----|------------------|---------------------|-----------|-----------|-------------|-----------|----------------|---------------|---------------------|-------------|
| 6   | GeneID:58496     | <i>LY6G5B</i>       | 31638728  | 31640227  | rs114733011 | 31631531  | 8.31E-03       | 1.25E-24      | 119.6544265         | 6.33096E-25 |
| 6   | GeneID:1460      | <i>CSNK2B</i>       | 31633657  | 31637843  | rs114733011 | 31631531  | 9.37E-03       | 1.41E-24      | 119.1722547         | 8.02503E-25 |
| 6   | GeneID:7918      | <i>GPANK1</i>       | 31629006  | 31634060  | rs114733011 | 31631531  | 1.06E-02       | 1.60E-24      | 118.6767976         | 1.02389E-24 |
| 6   | GeneID:55937     | <i>APOM</i>         | 31623671  | 31625987  | rs114733011 | 31631531  | 1.18E-02       | 1.78E-24      | 118.2536015         | 1.26074E-24 |
| 6   | GeneID:57827     | <i>C6orf47</i>      | 31626075  | 31628549  | rs114733011 | 31631531  | 1.18E-02       | 1.78E-24      | 118.2512115         | 1.26222E-24 |
| 6   | GeneID:7917      | <i>BAG6</i>         | 31606805  | 31620477  | rs114733011 | 31631531  | 1.43E-02       | 2.16E-24      | 117.4737949         | 1.84983E-24 |
| 6   | GeneID:720       | <i>C4A</i>          | 31949834  | 31970457  | rs6941112   | 31946614  | 2.32E-04       | 1.62E-22      | 117.0808126         | 2.24407E-24 |
| 6   | GeneID:1797      | <i>DOM3Z</i>        | 31937588  | 31940032  | rs6941112   | 31946614  | 2.56E-04       | 1.79E-22      | 116.6853816         | 2.72558E-24 |
| 6   | GeneID:8859      | <i>STK19</i>        | 31938952  | 31949223  | rs6941112   | 31946614  | 2.56E-04       | 1.79E-22      | 116.6853816         | 2.72558E-24 |
| 6   | GeneID:3108      | <i>HLA-DMA</i>      | 32916391  | 32920899  | rs73396802  | 32915797  | 1.41E-03       | 1.13E-22      | 114.1978129         | 9.2561E-24  |
| 6   | GeneID:6046      | <i>BRD2</i>         | 32936437  | 32949282  | rs57651384  | 32923849  | 1.52E-03       | 1.17E-22      | 113.980594          | 1.02987E-23 |
| 6   | GeneID:100289545 | <i>HIST1H3PS1</i>   | 26322104  | 26343616  | rs9393703   | 26356951  | 7.53E-10       | 3.46E-15      | 108.6065521         | 1.44257E-22 |
| 12  | GeneID:100128618 | <i>LOC100128618</i> | 112430798 | 112431862 | rs2339907   | 112418146 | 2.47E-04       | 2.07E-20      | 107.2608748         | 2.79275E-22 |
| 12  | GeneID:724085    | <i>LOC724085</i>    | 112437040 | 112438873 | rs7300252   | 112430346 | 4.49E-04       | 2.30E-20      | 105.8562766         | 5.56438E-22 |
| 12  | GeneID:100302227 | <i>MIR1302-1</i>    | 113132839 | 113132981 | rs6489853   | 113129584 | 4.08E-02       | 2.69E-22      | 105.7340854         | 5.90824E-22 |
| 12  | GeneID:654427    | <i>PCNPP1</i>       | 112104737 | 112108183 | rs10849966  | 112100773 | 6.46E-04       | 1.92E-20      | 105.485422          | 6.675E-22   |
| 6   | GeneID:7738      | <i>ZNF184</i>       | 27418521  | 27440897  | rs35716472  | 27406607  | 9.90E-09       | 2.56E-15      | 104.060552          | 1.34296E-21 |
| 6   | GeneID:10340     | <i>HIST1H2BPS2</i>  | 27831840  | 27832179  | rs45509595  | 27840926  | 8.08E-08       | 4.49E-16      | 103.3421039         | 1.91038E-21 |
| 6   | GeneID:8332      | <i>HIST1H2AL</i>    | 27833107  | 27833576  | rs45509595  | 27840926  | 8.22E-08       | 4.56E-16      | 103.2758369         | 1.97349E-21 |
| 6   | GeneID:3009      | <i>HIST1H1B</i>     | 27834570  | 27835359  | rs45509595  | 27840926  | 8.37E-08       | 4.64E-16      | 103.2047723         | 2.0435E-21  |
| 6   | GeneID:8368      | <i>HIST1H4L</i>     | 27840926  | 27841289  | rs45509595  | 27840926  | 8.63E-08       | 4.79E-16      | 103.0820947         | 2.17023E-21 |
| 6   | GeneID:8354      | <i>HIST1H3I</i>     | 27839623  | 27840099  | rs45509595  | 27840926  | 8.90E-08       | 4.94E-16      | 102.9576198         | 2.30686E-21 |
| 12  | GeneID:100271245 | <i>RPS2P41</i>      | 112317484 | 112318057 | rs7309970   | 112312368 | 3.00E-04       | 1.76E-19      | 102.5851323         | 2.76925E-21 |
| 12  | GeneID:160762    | <i>CCDC63</i>       | 111284811 | 111345338 | rs71458365  | 111274102 | 3.76E-05       | 1.76E-18      | 102.1380741         | 3.44809E-21 |
| 6   | GeneID:100189185 | <i>TRNAQ15</i>      | 26311975  | 26312046  | rs13220522  | 26316295  | 1.10E-07       | 1.54E-15      | 100.2694426         | 8.61952E-21 |
| 6   | GeneID:100189321 | <i>TRNAQ25</i>      | 26311424  | 26311495  | rs13220522  | 26316295  | 1.10E-07       | 1.54E-15      | 100.2692604         | 8.62029E-21 |
| 6   | GeneID:100189436 | <i>TRNAW9</i>       | 26319330  | 26319401  | rs34107459  | 26328353  | 9.91E-08       | 1.79E-15      | 100.162534          | 9.0833E-21  |
| Chr | Gene.id          | Name                | Start     | End       | SNP.id      | SNP.pos   | pval(headache) | pval(hypoPAN) | X <sup>2</sup> ,4df | FCP         |

| 6   | GeneID:100189410 | <i>TRNAR28</i>      | 26323046  | 26323118  | rs34107459  | 26328353  | 1.01E-07       | 1.83E-15      | 100.0836446         | 9.44145E-21 |
|-----|------------------|---------------------|-----------|-----------|-------------|-----------|----------------|---------------|---------------------|-------------|
| 6   | GeneID:100189094 | <i>TRNAM6</i>       | 26313352  | 26313423  | rs34107459  | 26328353  | 1.01E-07       | 1.83E-15      | 100.0779994         | 9.46762E-21 |
| 6   | GeneID:100189430 | <i>TRNAS27</i>      | 26312824  | 26312905  | rs13220522  | 26316295  | 1.20E-07       | 1.68E-15      | 99.90628511         | 1.0299E-20  |
| 6   | GeneID:100189382 | <i>TRNAS25</i>      | 26327817  | 26327898  | rs9467714   | 26340785  | 9.25E-08       | 2.33E-15      | 99.77790291         | 1.0968E-20  |
| 6   | GeneID:100189396 | <i>TRNAR26</i>      | 26328368  | 26328440  | rs9467714   | 26340785  | 9.83E-08       | 2.47E-15      | 99.53679184         | 1.23439E-20 |
| 12  | GeneID:100421482 | <i>LOC100421482</i> | 112760277 | 112760900 | rs10850031  | 112771063 | 8.46E-04       | 2.93E-19      | 99.50231748         | 1.25543E-20 |
| 6   | GeneID:100189040 | <i>TRNAM4</i>       | 26330529  | 26330600  | rs9467714   | 26340785  | 9.87E-08       | 2.68E-15      | 99.36551414         | 1.3425E-20  |
| 6   | GeneID:100189048 | <i>TRNAW2</i>       | 26331672  | 26331743  | rs9467714   | 26340785  | 1.03E-07       | 2.80E-15      | 99.18883222         | 1.46393E-20 |
| 6   | GeneID:3122      | <i>HLA-DRA</i>      | 32407619  | 32412823  | rs116479312 | 32408500  | 2.78E-03       | 1.12E-19      | 99.03829447         | 1.57603E-20 |
| 6   | GeneID:100189218 | <i>TRNAS16</i>      | 26305718  | 26305801  | rs13220522  | 26316295  | 1.53E-07       | 2.15E-15      | 98.93397401         | 1.6587E-20  |
| 6   | GeneID:7232      | <i>TRNAR3</i>       | 26299905  | 26299977  | rs10484439  | 26309908  | 1.80E-07       | 2.14E-15      | 98.62018085         | 1.93444E-20 |
| 6   | GeneID:645950    | <i>HNRNPA1P1</i>    | 27491226  | 27492316  | rs34573979  | 27480526  | 1.61E-08       | 2.28E-13      | 94.10282708         | 1.76822E-19 |
| 6   | GeneID:100129192 | <i>MICC</i>         | 30382490  | 30387543  | rs149543464 | 30400763  | 2.63E-07       | 1.50E-14      | 93.9568032          | 1.89926E-19 |
| 6   | GeneID:100189189 | <i>TRNAQ16</i>      | 27487308  | 27487379  | rs34573979  | 27480526  | 1.74E-08       | 2.47E-13      | 93.79062564         | 2.06024E-19 |
| 6   | GeneID:790951    | <i>TRNAS4</i>       | 27499987  | 27500068  | rs13195636  | 27509493  | 2.93E-08       | 1.87E-13      | 93.30050868         | 2.61889E-19 |
| 6   | GeneID:100507444 | <i>PPP1R2P1</i>     | 32844255  | 32847851  | rs115591082 | 32844103  | 5.24E-06       | 1.60E-15      | 92.4549026          | 3.96157E-19 |
| 10  | GeneID:100500866 | <i>MIR3941</i>      | 124176481 | 124176583 | rs79508005  | 124164620 | 2.69E-12       | 4.14E-09      | 91.89289245         | 5.21572E-19 |
| 6   | GeneID:23540     | <i>TRNAS3</i>       | 27473607  | 27473688  | rs34573979  | 27480526  | 1.56E-08       | 1.10E-12      | 91.02606617         | 7.97105E-19 |
| 6   | GeneID:23437     | <i>TRNAS2</i>       | 27463593  | 27463674  | rs58616630  | 27474715  | 1.71E-08       | 1.05E-12      | 90.93131171         | 8.34927E-19 |
| 6   | GeneID:100189292 | <i>TRNAD14</i>      | 27471523  | 27471594  | rs34573979  | 27480526  | 1.64E-08       | 1.15E-12      | 90.82158559         | 8.80972E-19 |
| 6   | GeneID:100189247 | <i>TRNAS19</i>      | 27470818  | 27470899  | rs34573979  | 27480526  | 1.70E-08       | 1.19E-12      | 90.69439002         | 9.37534E-19 |
| 10  | GeneID:59338     | <i>PLEKHA1</i>      | 124134094 | 124191871 | rs117634244 | 124199016 | 5.73E-12       | 7.35E-09      | 89.22825351         | 1.92057E-18 |
| 6   | GeneID:394263    | <i>MUC21</i>        | 30951485  | 30957675  | rs141725002 | 30971976  | 1.79E-02       | 3.64E-18      | 88.35338427         | 2.94592E-18 |
| 6   | GeneID:26695     | <i>OR2UIP</i>       | 29230436  | 29231856  | rs144447022 | 29244219  | 6.18E-09       | 1.28E-11      | 87.97426425         | 3.54584E-18 |
| 6   | GeneID:26694     | <i>OR2U2P</i>       | 29236242  | 29237198  | rs144447022 | 29244219  | 7.17E-09       | 1.48E-11      | 87.3756728          | 4.7512E-18  |
| 6   | GeneID:8348      | <i>HIST1H2BO</i>    | 27861203  | 27861669  | rs13199649  | 27868792  | 4.66E-08       | 2.30E-12      | 87.35609589         | 4.79688E-18 |
| 6   | GeneID:8336      | <i>HIST1H2AM</i>    | 27860477  | 27860963  | rs13199649  | 27868792  | 4.67E-08       | 2.31E-12      | 87.35156672         | 4.80751E-18 |
| 6   | GeneID:8356      | <i>HIST1H3J</i>     | 27858093  | 27858570  | rs13199649  | 27868792  | 4.98E-08       | 2.46E-12      | 87.08946835         | 5.4646E-18  |
| Chr | Gene.id          | Name                | Start     | End       | SNP.id      | SNP.pos   | pval(headache) | pval(hypoPAN) | X <sup>2</sup> ,4df | FCP         |

| 6   | GeneID:100189077 | <i>TRNAS10</i>      | 27446591 | 27446672 | rs7749305   | 27446566 | 1.40E-07       | 9.38E-13      | 86.95168386         | 5.84529E-18 |
|-----|------------------|---------------------|----------|----------|-------------|----------|----------------|---------------|---------------------|-------------|
| 6   | GeneID:100189158 | <i>TRNAD8</i>       | 27447453 | 27447524 | rs7749305   | 27446566 | 1.41E-07       | 9.47E-13      | 86.9139405          | 5.95412E-18 |
| 6   | GeneID:645927    | <i>MCFD2P1</i>      | 27375502 | 27377470 | rs34071253  | 27391802 | 1.07E-08       | 1.34E-11      | 86.7856888          | 6.33928E-18 |
| 6   | GeneID:100147813 | <i>RNU7-26P</i>     | 27865284 | 27865343 | rs61742093  | 27879982 | 4.37E-08       | 3.41E-12      | 86.69975939         | 6.61118E-18 |
| 8   | GeneID:100421823 | <i>LOC100421823</i> | 8011887  | 8074438  | rs2955581   | 8088877  | 2.24E-05       | 7.20E-15      | 86.5410639          | 7.14433E-18 |
| 6   | GeneID:26212     | <i>OR2B6</i>        | 27925019 | 27925960 | rs149583087 | 27912437 | 1.69E-08       | 9.74E-12      | 86.50191337         | 7.28234E-18 |
| 6   | GeneID:442190    | <i>OR2B4P</i>       | 29258373 | 29259527 | rs144447022 | 29244219 | 9.80E-09       | 2.02E-11      | 86.12710554         | 8.74613E-18 |
| 6   | GeneID:346157    | <i>ZNF391</i>       | 27356524 | 27369227 | rs67859638  | 27357978 | 1.21E-08       | 1.66E-11      | 86.10730487         | 8.83117E-18 |
| 6   | GeneID:11119     | <i>BTN3A1</i>       | 26402465 | 26415444 | rs2072803   | 26392515 | 1.17E-10       | 1.83E-09      | 85.97741861         | 9.40983E-18 |
| 6   | GeneID:81406     | <i>OR2W6P</i>       | 27905182 | 27906179 | rs149583087 | 27912437 | 1.95E-08       | 1.12E-11      | 85.93045787         | 9.62825E-18 |
| 6   | GeneID:442175    | <i>RPLP2P1</i>      | 27932953 | 27933234 | rs28360499  | 27945396 | 2.22E-08       | 1.98E-11      | 84.53423567         | 1.9045E-17  |
| 6   | GeneID:3879      | <i>KRT18P1</i>      | 28936847 | 28938244 | rs148696809 | 28934352 | 5.80E-09       | 7.71E-11      | 84.5014265          | 1.93527E-17 |
| 6   | GeneID:10385     | <i>BTN2A2</i>       | 26383324 | 26395102 | rs2072803   | 26392515 | 1.73E-10       | 2.72E-09      | 84.39836566         | 2.03518E-17 |
| 6   | GeneID:100189315 | <i>TRNAM17</i>      | 27870271 | 27870342 | rs13218875  | 27884012 | 3.31E-08       | 1.66E-11      | 84.085962           | 2.37065E-17 |
| 6   | GeneID:81407     | <i>OR2W4P</i>       | 27944929 | 27945851 | rs28360499  | 27945396 | 2.52E-08       | 2.25E-11      | 84.02749814         | 2.43932E-17 |
| 6   | GeneID:100189314 | <i>TRNAG29</i>      | 27870686 | 27870756 | rs13218875  | 27884012 | 3.41E-08       | 1.71E-11      | 83.96894196         | 2.51008E-17 |
| 6   | GeneID:54718     | <i>BTN2A3P</i>      | 26421619 | 26430816 | rs9379875   | 26444732 | 4.74E-10       | 1.30E-09      | 83.86195551         | 2.64471E-17 |
| 6   | GeneID:81697     | <i>OR2B2</i>        | 27878963 | 27880174 | rs13218875  | 27884012 | 3.53E-08       | 1.77E-11      | 83.83143989         | 2.68442E-17 |
| 6   | GeneID:81694     | <i>OR2W2P</i>       | 28001693 | 28002640 | rs13193295  | 28003228 | 2.65E-08       | 2.62E-11      | 83.61867654         | 2.97834E-17 |
| 6   | GeneID:100189111 | <i>TRNAM8</i>       | 28921042 | 28921114 | rs148696809 | 28934352 | 7.63E-09       | 1.01E-10      | 83.40820107         | 3.30072E-17 |
| 6   | GeneID:222698    | <i>NKAPL</i>        | 28227098 | 28228736 | rs17720293  | 28214698 | 1.85E-08       | 4.32E-11      | 83.34424167         | 3.40543E-17 |
| 6   | GeneID:7746      | <i>ZNF193</i>       | 28193029 | 28201265 | rs17720293  | 28214698 | 2.28E-08       | 3.50E-11      | 83.34274051         | 3.40793E-17 |
| 6   | GeneID:100419608 | <i>LOC100419608</i> | 28083427 | 28083998 | rs66886492  | 28089731 | 2.61E-08       | 3.08E-11      | 83.32989143         | 3.42938E-17 |
| 6   | GeneID:81695     | <i>OR2B7P</i>       | 28014213 | 28015147 | rs13193295  | 28003228 | 2.81E-08       | 3.10E-11      | 83.16403502         | 3.71865E-17 |
| 6   | GeneID:140468    | <i>COX11P1</i>      | 28414697 | 28415407 | rs67381177  | 28411941 | 3.40E-08       | 2.89E-11      | 82.92491793         | 4.17915E-17 |
| 6   | GeneID:387032    | <i>ZKSCAN4</i>      | 28212490 | 28220002 | rs17720293  | 28214698 | 2.24E-08       | 4.39E-11      | 82.92347385         | 4.1821E-17  |
| 6   | GeneID:100420941 | <i>LOC100420941</i> | 26478093 | 26478749 | rs13195401  | 26463574 | 7.28E-10       | 1.38E-09      | 82.88848873         | 4.25414E-17 |
| 6   | GeneID:26719     | <i>OR2E1P</i>       | 28423307 | 28423934 | rs67381177  | 28411941 | 3.44E-08       | 2.92E-11      | 82.88842956         | 4.25427E-17 |
| Chr | Gene.id          | Name                | Start    | End      | SNP.id      | SNP.pos  | pval(headache) | pval(hypoPAN) | X <sup>2</sup> ,4df | FCP         |

| 6   | GeneID:100189159 | <i>TRNASI3</i>      | 28180815 | 28180896 | rs13197633 | 28174757 | 3.37E-08       | 3.03E-11      | 82.85204777         | 4.33051E-17 |
|-----|------------------|---------------------|----------|----------|------------|----------|----------------|---------------|---------------------|-------------|
| 6   | GeneID:100419756 | <i>LOC100419756</i> | 28376002 | 28377027 | rs35883476 | 28368508 | 3.09E-08       | 3.30E-11      | 82.85133352         | 4.33202E-17 |
| 6   | GeneID:340192    | <i>IQCB2P</i>       | 27978329 | 27980680 | rs71559067 | 27994416 | 3.19E-08       | 3.24E-11      | 82.8257375          | 4.38649E-17 |
| 6   | GeneID:222696    | <i>ZSCAN23</i>      | 28400432 | 28411279 | rs13201681 | 28394680 | 3.46E-08       | 3.28E-11      | 82.64111646         | 4.80022E-17 |
| 6   | GeneID:222699    | <i>TOB2P1</i>       | 28183116 | 28186707 | rs13197633 | 28174757 | 3.70E-08       | 3.33E-11      | 82.47984963         | 5.1934E-17  |
| 6   | GeneID:80345     | <i>ZSCAN16</i>      | 28092387 | 28097857 | rs66886492 | 28089731 | 3.25E-08       | 4.03E-11      | 82.35099987         | 5.53054E-17 |
| 6   | GeneID:9753      | <i>ZSCAN12</i>      | 28346598 | 28367544 | rs35883476 | 28368508 | 3.71E-08       | 3.56E-11      | 82.33916493         | 5.56259E-17 |
| 6   | GeneID:7211      | <i>TRMEP1</i>       | 28448503 | 28448575 | rs34676049 | 28453618 | 2.74E-08       | 4.98E-11      | 82.26957909         | 5.75478E-17 |
| 6   | GeneID:65944     | <i>OR2B8P</i>       | 28020906 | 28022043 | rs13200214 | 28017250 | 3.71E-08       | 3.74E-11      | 82.24093851         | 5.8358E-17  |
| 6   | GeneID:8344      | <i>HIST1H2BE</i>    | 26184024 | 26184458 | rs67575965 | 26196593 | 5.08E-09       | 2.73E-10      | 82.2388561          | 5.84173E-17 |
| 6   | GeneID:100189344 | <i>TRNAT16</i>      | 28442329 | 28442402 | rs34676049 | 28453618 | 2.76E-08       | 5.02E-11      | 82.23818068         | 5.84366E-17 |
| 6   | GeneID:100189035 | <i>TRNAT5</i>       | 28456770 | 28456843 | rs34676049 | 28453618 | 2.70E-08       | 5.22E-11      | 82.20940875         | 5.92631E-17 |
| 6   | GeneID:7209      | <i>TRNAL47P</i>     | 28446350 | 28446431 | rs34676049 | 28453618 | 2.85E-08       | 5.18E-11      | 82.11286217         | 6.21228E-17 |
| 6   | GeneID:100189118 | <i>TRNAL12</i>      | 28446400 | 28446481 | rs34676049 | 28453618 | 2.85E-08       | 5.18E-11      | 82.11286217         | 6.21228E-17 |
| 6   | GeneID:100189131 | <i>TRNAI6</i>       | 27599200 | 27599293 | rs35715914 | 27592003 | 2.50E-08       | 6.28E-11      | 81.98926792         | 6.59858E-17 |
| 6   | GeneID:100189300 | <i>TRNAT13</i>      | 27586135 | 27586208 | rs35715914 | 27592003 | 2.53E-08       | 6.34E-11      | 81.94941647         | 6.72819E-17 |
| 6   | GeneID:100189352 | <i>TRNAS24</i>      | 27509554 | 27509635 | rs35848276 | 27521096 | 3.03E-08       | 5.42E-11      | 81.90006301         | 6.89223E-17 |
| 6   | GeneID:100189336 | <i>TRNAI20</i>      | 27144994 | 27145067 | rs34569203 | 27153984 | 2.62E-10       | 6.30E-09      | 81.88983321         | 6.92673E-17 |
| 6   | GeneID:94017     | <i>TRNAS1</i>       | 27513468 | 27513549 | rs35848276 | 27521096 | 3.07E-08       | 5.48E-11      | 81.85407746         | 7.04867E-17 |
| 6   | GeneID:100189268 | <i>TRNAQ21</i>      | 27515531 | 27515602 | rs35848276 | 27521096 | 3.08E-08       | 5.50E-11      | 81.8399524          | 7.09743E-17 |
| 6   | GeneID:222701    | <i>ZNF192P2</i>     | 28155716 | 28157189 | rs13195291 | 28169241 | 3.64E-08       | 4.76E-11      | 81.79384808         | 7.25895E-17 |
| 6   | GeneID:651302    | <i>ZNF192P1</i>     | 28129551 | 28137376 | rs35749575 | 28114818 | 3.58E-08       | 4.92E-11      | 81.76053789         | 7.37793E-17 |
| 6   | GeneID:11120     | <i>BTN2A1</i>       | 26458153 | 26476849 | rs9379875  | 26444732 | 7.43E-10       | 2.47E-09      | 81.67876452         | 7.67833E-17 |
| 6   | GeneID:8360      | <i>HIST1H4D</i>     | 26188938 | 26189304 | rs67575965 | 26196593 | 5.99E-09       | 3.22E-10      | 81.57811479         | 8.06492E-17 |
| 6   | GeneID:100189070 | <i>TRNAS9</i>       | 27521192 | 27521273 | rs35848276 | 27521096 | 3.30E-08       | 5.89E-11      | 81.56616024         | 8.11211E-17 |
| 8   | GeneID:286042    | <i>FLJ10661</i>     | 8086092  | 8102387  | rs2955581  | 8088877  | 1.64E-04       | 1.19E-14      | 81.55565091         | 8.15382E-17 |
| 6   | GeneID:100129195 | <i>LOC100129195</i> | 28058336 | 28105071 | rs35749575 | 28114818 | 4.09E-08       | 4.84E-11      | 81.52529896         | 8.2755E-17  |
| 6   | GeneID:100189219 | <i>TRNAY8</i>       | 26595102 | 26595190 | rs34781270 | 26593037 | 8.07E-10       | 2.46E-09      | 81.5195759          | 8.29865E-17 |
| Chr | Gene.id          | Name                | Start    | End      | SNP.id     | SNP.pos  | pval(headache) | pval(hypoPAN) | X <sup>2</sup> ,4df | FCP         |



| 6   | GeneID:221584    | <i>ZSCAN12P1</i>          | 28058929 | 28063493 | rs35952432 | 28074901 | 4.07E-08       | 4.94E-11      | 81.49268467         | 8.40827E-17 |
|-----|------------------|---------------------------|----------|----------|------------|----------|----------------|---------------|---------------------|-------------|
| 6   | GeneID:285819    | <i>LOC285819</i>          | 26472172 | 26482737 | rs13195401 | 26463574 | 1.02E-09       | 1.97E-09      | 81.48939526         | 8.42178E-17 |
| 6   | GeneID:7754      | <i>ZNF204P</i>            | 27325602 | 27343153 | rs67859638 | 27357978 | 1.16E-08       | 1.77E-10      | 81.44457241         | 8.60803E-17 |
| 6   | GeneID:7745      | <i>ZNF192</i>             | 28109716 | 28125236 | rs35749575 | 28114818 | 3.81E-08       | 5.49E-11      | 81.41679022         | 8.72554E-17 |
| 6   | GeneID:696       | <i>BTN1A1</i>             | 26501495 | 26510653 | rs34148261 | 26511744 | 1.28E-09       | 1.65E-09      | 81.39491814         | 8.81917E-17 |
| 6   | GeneID:100189143 | <i>TRNA<sup>T7</sup></i>  | 27130050 | 27130123 | rs13194053 | 27143883 | 4.41E-10       | 5.00E-09      | 81.31154057         | 9.18541E-17 |
| 6   | GeneID:80317     | <i>ZKSCAN3</i>            | 28317691 | 28336954 | rs13214023 | 28332141 | 5.02E-08       | 4.46E-11      | 81.28425987         | 9.30851E-17 |
| 6   | GeneID:100189012 | <i>TRNAR5</i>             | 27529963 | 27530049 | rs35848276 | 27521096 | 3.57E-08       | 6.39E-11      | 81.24452731         | 9.49075E-17 |
| 6   | GeneID:100128240 | <i>LOC100128240</i>       | 27528605 | 27529550 | rs35848276 | 27521096 | 3.57E-08       | 6.39E-11      | 81.24324134         | 9.49671E-17 |
| 6   | GeneID:100189074 | <i>TRNA<sup>Q10</sup></i> | 27763640 | 27763711 | rs35037868 | 27759115 | 7.56E-08       | 3.08E-11      | 81.20616663         | 9.67009E-17 |
| 6   | GeneID:100189526 | <i>TRNAS32P</i>           | 27261671 | 27261744 | rs13207082 | 27251379 | 2.15E-09       | 1.13E-09      | 81.12206061         | 1.00752E-16 |
| 6   | GeneID:8341      | <i>HIST1H2BN</i>          | 27806440 | 27806888 | rs35202262 | 27799514 | 1.38E-07       | 1.77E-11      | 81.11098539         | 1.01298E-16 |
| 6   | GeneID:8330      | <i>HIST1H2AK</i>          | 27805658 | 27806117 | rs35202262 | 27799514 | 1.38E-07       | 1.77E-11      | 81.1100317          | 1.01345E-16 |
| 6   | GeneID:100189002 | <i>TRNAS5</i>             | 27265775 | 27265856 | rs13207082 | 27251379 | 2.16E-09       | 1.13E-09      | 81.10502551         | 1.01593E-16 |
| 6   | GeneID:100189329 | <i>TRNA<sup>Q27</sup></i> | 27263212 | 27263283 | rs13207082 | 27251379 | 2.22E-09       | 1.16E-09      | 80.99645276         | 1.07121E-16 |
| 6   | GeneID:100189162 | <i>TRNAY7</i>             | 26577332 | 26577420 | rs13190739 | 26587373 | 9.73E-10       | 2.77E-09      | 80.91068809         | 1.11699E-16 |
| 6   | GeneID:394255    | <i>RPS10P1</i>            | 26202351 | 26202943 | rs67575965 | 26196593 | 7.07E-09       | 3.81E-10      | 80.91013102         | 1.11729E-16 |
| 6   | GeneID:8343      | <i>HIST1H2BF</i>          | 26199787 | 26200216 | rs67575965 | 26196593 | 7.17E-09       | 3.86E-10      | 80.8588828          | 1.14558E-16 |
| 6   | GeneID:100189372 | <i>TRNA<sup>I22</sup></i> | 26745255 | 26745328 | rs13213200 | 26755915 | 2.38E-10       | 1.16E-08      | 80.85817418         | 1.14598E-16 |
| 6   | GeneID:100189214 | <i>TRNA<sup>Q17</sup></i> | 27759135 | 27759206 | rs35037868 | 27759115 | 8.18E-08       | 3.53E-11      | 80.77258499         | 1.19485E-16 |
| 6   | GeneID:3013      | <i>HIST1H2AD</i>          | 26199012 | 26199471 | rs67575965 | 26196593 | 7.38E-09       | 3.97E-10      | 80.74349059         | 1.21193E-16 |
| 6   | GeneID:64288     | <i>ZNF323</i>             | 28292514 | 28324048 | rs13214023 | 28332141 | 5.49E-08       | 5.45E-11      | 80.70102993         | 1.2373E-16  |
| 6   | GeneID:8351      | <i>HIST1H3D</i>           | 26197012 | 26199464 | rs67575965 | 26196593 | 7.56E-09       | 4.07E-10      | 80.64715251         | 1.27026E-16 |
| 6   | GeneID:7741      | <i>ZNF187</i>             | 28234788 | 28245981 | rs13208096 | 28225311 | 6.43E-08       | 5.03E-11      | 80.54608303         | 1.33446E-16 |
| 6   | GeneID:100189337 | <i>TRNAY12</i>            | 26575798 | 26575887 | rs13190739 | 26587373 | 1.07E-09       | 3.03E-09      | 80.54595345         | 1.33455E-16 |
| 6   | GeneID:100126484 | <i>TRNAM-CAU</i>          | 26735574 | 26735646 | rs35144506 | 26739487 | 5.93E-10       | 5.49E-09      | 80.5321696          | 1.34355E-16 |
| 6   | GeneID:10384     | <i>BTN3A3</i>             | 26440700 | 26453643 | rs9379875  | 26444732 | 6.71E-10       | 4.89E-09      | 80.51499179         | 1.35486E-16 |
| 6   | GeneID:442179    | <i>OR1F12</i>             | 28041026 | 28042002 | rs71559070 | 28038929 | 5.63E-08       | 6.48E-11      | 80.30493295         | 1.50107E-16 |
| Chr | Gene.id          | Name                      | Start    | End      | SNP.id     | SNP.pos  | pval(headache) | pval(hypoPAN) | X <sup>2</sup> ,4df | FCP         |

| 6   | GeneID:100189205 | <i>TRNAS15</i>      | 27640229 | 27640310 | rs13217620  | 27653120 | 3.55E-08       | 1.03E-10      | 80.29625059         | 1.50744E-16 |
|-----|------------------|---------------------|----------|----------|-------------|----------|----------------|---------------|---------------------|-------------|
| 6   | GeneID:84547     | <i>PGBD1</i>        | 28249314 | 28270326 | rs33932084  | 28268824 | 4.40E-08       | 8.45E-11      | 80.26636985         | 1.52958E-16 |
| 6   | GeneID:8362      | <i>HIST1H4K</i>     | 27798952 | 27799305 | rs35202262  | 27799514 | 1.34E-07       | 2.79E-11      | 80.25015909         | 1.54172E-16 |
| 6   | GeneID:100189161 | <i>TRNAV17</i>      | 27648885 | 27648957 | rs13217620  | 27653120 | 3.64E-08       | 1.06E-10      | 80.1889959          | 1.58842E-16 |
| 11  | GeneID:6506      | <i>SLC1A2</i>       | 35272752 | 35441532 | rs10836381  | 35388274 | 7.77E-03       | 5.00E-16      | 80.18047438         | 1.59503E-16 |
| 6   | GeneID:100507241 | <i>LOC100507241</i> | 28046570 | 28048908 | rs35902873  | 28058949 | 6.06E-08       | 6.97E-11      | 80.01138002         | 1.73218E-16 |
| 6   | GeneID:100189428 | <i>TRNAR29</i>      | 27638344 | 27638416 | rs13217620  | 27653120 | 3.82E-08       | 1.11E-10      | 79.99540064         | 1.74574E-16 |
| 6   | GeneID:8363      | <i>HIST1H4J</i>     | 27791903 | 27792258 | rs35202262  | 27799514 | 1.21E-07       | 3.81E-11      | 79.84101329         | 1.88228E-16 |
| 6   | GeneID:7718      | <i>ZNF165</i>       | 28048482 | 28057341 | rs34166054  | 28065801 | 6.34E-08       | 7.29E-11      | 79.83213162         | 1.89046E-16 |
| 6   | GeneID:8367      | <i>HIST1H4E</i>     | 26204873 | 26205249 | rs67575965  | 26196593 | 6.51E-09       | 7.27E-10      | 79.78316429         | 1.93615E-16 |
| 6   | GeneID:100189340 | <i>TRNAT15</i>      | 27652474 | 27652547 | rs13217620  | 27653120 | 4.05E-08       | 1.18E-10      | 79.76601207         | 1.95242E-16 |
| 6   | GeneID:100507141 | <i>LOC100507141</i> | 26864941 | 26865525 | rs77666565  | 26851415 | 1.32E-09       | 3.67E-09      | 79.74061295         | 1.97676E-16 |
| 6   | GeneID:729400    | <i>LOC729400</i>    | 26866104 | 26868093 | rs77666565  | 26851415 | 1.32E-09       | 3.68E-09      | 79.72333647         | 1.99349E-16 |
| 6   | GeneID:100189071 | <i>TRNAI4</i>       | 27655967 | 27656040 | rs13217620  | 27653120 | 4.15E-08       | 1.21E-10      | 79.67254118         | 2.04349E-16 |
| 6   | GeneID:10337     | <i>HIST1H4PS1</i>   | 27774945 | 27775115 | rs13195728  | 27771106 | 1.50E-07       | 3.41E-11      | 79.62291455         | 2.09356E-16 |
| 6   | GeneID:8969      | <i>HIST1H2AG</i>    | 27100817 | 27101314 | rs67330695  | 27103654 | 7.43E-10       | 6.93E-09      | 79.61310249         | 2.10361E-16 |
| 6   | GeneID:85236     | <i>HIST1H2BK</i>    | 27106072 | 27114637 | rs61240102  | 27124904 | 7.30E-10       | 7.07E-09      | 79.61249299         | 2.10423E-16 |
| 6   | GeneID:80864     | <i>EGFL8</i>        | 32132382 | 32136062 | rs192471087 | 32119730 | 1.94E-03       | 2.72E-15      | 79.57043193         | 2.14785E-16 |
| 6   | GeneID:8329      | <i>HIST1H2AI</i>    | 27775977 | 27776445 | rs13195728  | 27771106 | 1.53E-07       | 3.47E-11      | 79.56167123         | 2.15704E-16 |
| 6   | GeneID:8340      | <i>HIST1H2BL</i>    | 27775257 | 27775709 | rs13195728  | 27771106 | 1.54E-07       | 3.49E-11      | 79.53223774         | 2.18823E-16 |
| 6   | GeneID:8970      | <i>HIST1H2BJ</i>    | 27100095 | 27100575 | rs67330695  | 27103654 | 7.66E-10       | 7.14E-09      | 79.49494662         | 2.2284E-16  |
| 6   | GeneID:100189272 | <i>TRNAY10</i>      | 26569086 | 26569176 | rs72844462  | 26563864 | 1.98E-09       | 2.86E-09      | 79.42749913         | 2.30292E-16 |
| 6   | GeneID:352957    | <i>MICF</i>         | 29819964 | 29821829 | rs114853934 | 29812896 | 8.48E-04       | 6.84E-15      | 79.37604032         | 2.36145E-16 |
| 6   | GeneID:8345      | <i>HIST1H2BH</i>    | 26251879 | 26252303 | rs55706012  | 26266311 | 1.36E-07       | 4.37E-11      | 79.32543036         | 2.42046E-16 |
| 6   | GeneID:8355      | <i>HIST1H3G</i>     | 26271146 | 26271612 | rs55706012  | 26266311 | 1.37E-07       | 4.40E-11      | 79.30066543         | 2.44987E-16 |
| 6   | GeneID:8342      | <i>HIST1H2BM</i>    | 27782822 | 27783267 | rs13195728  | 27771106 | 1.63E-07       | 3.71E-11      | 79.29069749         | 2.46181E-16 |
| 6   | GeneID:100189041 | <i>TRNAS7</i>       | 27177628 | 27177709 | rs4713071   | 27187919 | 4.97E-10       | 1.23E-08      | 79.27424841         | 2.48164E-16 |
| 6   | GeneID:100009603 | <i>TRNAA2</i>       | 26572092 | 26572164 | rs72844462  | 26563864 | 2.07E-09       | 2.99E-09      | 79.24864159         | 2.51282E-16 |
| Chr | Gene.id          | Name                | Start    | End      | SNP.id      | SNP.pos  | pval(headache) | pval(hypoPAN) | X <sup>2</sup> ,4df | FCP         |

| 6   | GeneID:8346      | <i>HIST1H2BI</i>    | 26273204 | 26273640 | rs55706012  | 26266311 | 1.39E-07       | 4.46E-11      | 79.24719081         | 2.5146E-16  |
|-----|------------------|---------------------|----------|----------|-------------|----------|----------------|---------------|---------------------|-------------|
| 6   | GeneID:442172    | <i>LOC442172</i>    | 27235885 | 27237008 | rs35982103  | 27243134 | 1.09E-09       | 5.72E-09      | 79.24119902         | 2.52196E-16 |
| 6   | GeneID:8357      | <i>HIST1H3H</i>     | 27777842 | 27778314 | rs13195728  | 27771106 | 1.65E-07       | 3.76E-11      | 79.23952862         | 2.52402E-16 |
| 6   | GeneID:8331      | <i>HIST1H2AJ</i>    | 27782080 | 27782518 | rs13195728  | 27771106 | 1.66E-07       | 3.78E-11      | 79.22097262         | 2.54696E-16 |
| 8   | GeneID:83655     | <i>LINC00208</i>    | 11434044 | 11438850 | rs12549150  | 11422936 | 6.22E-06       | 1.03E-12      | 79.18193294         | 2.59592E-16 |
| 6   | GeneID:100507025 | <i>LOC100507025</i> | 26281278 | 26285763 | rs55706012  | 26266311 | 1.41E-07       | 4.54E-11      | 79.17812225         | 2.60075E-16 |
| 6   | GeneID:100189167 | <i>TRNAR17</i>      | 27181623 | 27181695 | rs4713071   | 27187919 | 5.12E-10       | 1.26E-08      | 79.15730992         | 2.62728E-16 |
| 6   | GeneID:7202      | <i>TRNAI1</i>       | 27241739 | 27241812 | rs35982103  | 27243134 | 1.11E-09       | 5.86E-09      | 79.1467742          | 2.64081E-16 |
| 6   | GeneID:8333      | <i>HIST1H2APS4</i>  | 26272421 | 26272768 | rs55706012  | 26266311 | 1.43E-07       | 4.60E-11      | 79.1213984          | 2.6737E-16  |
| 6   | GeneID:100189368 | <i>TRNAV28</i>      | 27173867 | 27173939 | rs4713071   | 27187919 | 5.18E-10       | 1.28E-08      | 79.11462738         | 2.68254E-16 |
| 6   | GeneID:100189099 | <i>TRNAR10</i>      | 27182952 | 27183024 | rs4713071   | 27187919 | 5.21E-10       | 1.29E-08      | 79.08876493         | 2.71659E-16 |
| 6   | GeneID:100189213 | <i>TRNAI11</i>      | 27242990 | 27243063 | rs35982103  | 27243134 | 1.13E-09       | 5.94E-09      | 79.08628032         | 2.71988E-16 |
| 6   | GeneID:442171    | <i>RPL10P2</i>      | 27179023 | 27179663 | rs4713071   | 27187919 | 5.26E-10       | 1.30E-08      | 79.04939269         | 2.76925E-16 |
| 6   | GeneID:100507547 | <i>LOC100507547</i> | 32120579 | 32122142 | rs192471087 | 32119730 | 2.27E-03       | 3.18E-15      | 78.94378656         | 2.9156E-16  |
| 6   | GeneID:100189157 | <i>TRNAS12</i>      | 27065085 | 27065166 | rs34388707  | 27050396 | 8.80E-10       | 9.16E-09      | 78.71991142         | 3.25191E-16 |
| 6   | GeneID:9374      | <i>PPT2</i>         | 32121229 | 32131458 | rs192471087 | 32119730 | 2.40E-03       | 3.37E-15      | 78.7154636          | 3.25897E-16 |
| 6   | GeneID:100532746 | <i>PPT2-EGFL8</i>   | 32121776 | 32136062 | rs192471087 | 32119730 | 2.40E-03       | 3.37E-15      | 78.71499848         | 3.25971E-16 |
| 6   | GeneID:100189462 | <i>TRNAI28P</i>     | 27251864 | 27251937 | rs35982103  | 27243134 | 1.35E-09       | 6.13E-09      | 78.66439461         | 3.34115E-16 |
| 6   | GeneID:100189345 | <i>TRNAM18</i>      | 27300764 | 27300835 | rs71537559  | 27309779 | 3.24E-08       | 2.62E-10      | 78.61877679         | 3.4163E-16  |
| 6   | GeneID:100189363 | <i>TRNAV27</i>      | 27248049 | 27248121 | rs35982103  | 27243134 | 1.38E-09       | 6.25E-09      | 78.58944831         | 3.4655E-16  |
| 6   | GeneID:729392    | <i>POM121L6P</i>    | 26838446 | 26865940 | rs77666565  | 26851415 | 1.77E-09       | 4.93E-09      | 78.55523785         | 3.52379E-16 |
| 6   | GeneID:100189182 | <i>TRNAK19</i>      | 27302769 | 27302841 | rs71537559  | 27309779 | 3.33E-08       | 2.69E-10      | 78.50801222         | 3.60588E-16 |
| 6   | GeneID:100189172 | <i>TRNAP10</i>      | 27059521 | 27059592 | rs6904071   | 27047256 | 8.75E-10       | 1.03E-08      | 78.4980025          | 3.62352E-16 |
| 6   | GeneID:100189408 | <i>TRNAV31</i>      | 27258405 | 27258477 | rs13207082  | 27251379 | 2.01E-09       | 5.32E-09      | 78.15142159         | 4.29058E-16 |
| 6   | GeneID:7212      | <i>TRNAM2</i>       | 27745664 | 27745735 | rs35037868  | 27759115 | 7.31E-08       | 1.48E-10      | 78.1305794          | 4.3344E-16  |
| 6   | GeneID:100507173 | <i>LOC100507173</i> | 27661814 | 27678001 | rs13217620  | 27653120 | 6.23E-08       | 1.82E-10      | 78.04009077         | 4.52989E-16 |
| 6   | GeneID:100129755 | <i>RSL24D1P1</i>    | 27748462 | 27748890 | rs35037868  | 27759115 | 7.50E-08       | 1.52E-10      | 78.02426121         | 4.56498E-16 |
| 6   | GeneID:791231    | <i>TRNAV8</i>       | 27618707 | 27618779 | rs144969912 | 27616843 | 2.89E-08       | 3.98E-10      | 78.00835668         | 4.60051E-16 |
| Chr | Gene.id          | Name                | Start    | End      | SNP.id      | SNP.pos  | pval(headache) | pval(hypoPAN) | X <sup>2</sup> ,4df | FCP         |

| 6   | GeneID:100189301 | <i>TRNAL28</i>      | 27573417 | 27573524 | rs34105070  | 27560805 | 3.65E-08       | 3.39E-10      | 77.86225307         | 4.94013E-16 |
|-----|------------------|---------------------|----------|----------|-------------|----------|----------------|---------------|---------------------|-------------|
| 6   | GeneID:387046    | <i>RPL8P1</i>       | 27620370 | 27620512 | rs144969912 | 27616843 | 3.02E-08       | 4.17E-10      | 77.82984485         | 5.01879E-16 |
| 17  | GeneID:644256    | <i>DND1P2</i>       | 44336419 | 44337979 | rs117629202 | 44344596 | 1.01E-15       | 1.27E-02      | 77.79664949         | 5.10067E-16 |
| 6   | GeneID:353009    | <i>3.8-1.4</i>      | 29833692 | 29834864 | rs62389319  | 29847388 | 1.35E-03       | 9.52E-15      | 77.79242125         | 5.11119E-16 |
| 17  | GeneID:644253    | <i>MAPK8IPP</i>     | 44320972 | 44322410 | rs111535660 | 44314148 | 7.46E-16       | 1.88E-02      | 77.61617799         | 5.56971E-16 |
| 6   | GeneID:100189038 | <i>TRNAL8</i>       | 27570348 | 27570454 | rs34105070  | 27560805 | 3.95E-08       | 3.67E-10      | 77.54370207         | 5.76999E-16 |
| 6   | GeneID:100189390 | <i>TRNAK31</i>      | 27543846 | 27543918 | rs10484399  | 27534528 | 5.29E-08       | 2.76E-10      | 77.53264593         | 5.80117E-16 |
| 11  | GeneID:960       | <i>CD44</i>         | 35160417 | 35253949 | rs76276019  | 35239888 | 1.43E-02       | 1.06E-15      | 77.45699169         | 6.01908E-16 |
| 6   | GeneID:29777     | <i>ABT1</i>         | 26597171 | 26600278 | rs34781270  | 26593037 | 8.44E-10       | 1.83E-08      | 77.41550682         | 6.14203E-16 |
| 6   | GeneID:100189101 | <i>TRNAV15</i>      | 27696327 | 27696399 | rs34409918  | 27685348 | 1.15E-07       | 1.35E-10      | 77.39310137         | 6.20947E-16 |
| 6   | GeneID:387317    | <i>VNIR11P</i>      | 27051071 | 27051995 | rs6904071   | 27047256 | 1.02E-09       | 1.57E-08      | 77.34208748         | 6.3658E-16  |
| 6   | GeneID:100189297 | <i>TRNAM15</i>      | 27560600 | 27560671 | rs34105070  | 27560805 | 4.16E-08       | 3.86E-10      | 77.33889989         | 6.37569E-16 |
| 6   | GeneID:79692     | <i>ZNF322</i>       | 26634611 | 26659980 | rs149123117 | 26670618 | 7.23E-10       | 2.26E-08      | 77.30300543         | 6.48822E-16 |
| 6   | GeneID:387316    | <i>VNIR10P</i>      | 27292695 | 27293631 | rs56401801  | 27301512 | 4.43E-08       | 3.78E-10      | 77.25868446         | 6.6299E-16  |
| 6   | GeneID:100189200 | <i>TRNAD9</i>       | 27551236 | 27551307 | rs34105070  | 27560805 | 4.26E-08       | 3.96E-10      | 77.24061023         | 6.68856E-16 |
| 6   | GeneID:100189053 | <i>TRNAK8</i>       | 27559593 | 27559665 | rs34105070  | 27560805 | 4.29E-08       | 3.98E-10      | 77.21691354         | 6.76625E-16 |
| 6   | GeneID:100189164 | <i>TRNAL16</i>      | 27688898 | 27688980 | rs34409918  | 27685348 | 1.22E-07       | 1.43E-10      | 77.18258841         | 6.8804E-16  |
| 6   | GeneID:100189374 | <i>TRNAT18</i>      | 27694473 | 27694546 | rs34409918  | 27685348 | 1.23E-07       | 1.45E-10      | 77.13072243         | 7.05654E-16 |
| 6   | GeneID:83954     | <i>FKSG83</i>       | 27292578 | 27293742 | rs56401801  | 27301512 | 4.58E-08       | 3.90E-10      | 77.12637058         | 7.07152E-16 |
| 6   | GeneID:100189095 | <i>TRNAI5</i>       | 27636362 | 27636435 | rs56405707  | 27640246 | 4.12E-08       | 4.44E-10      | 77.08202467         | 7.22601E-16 |
| 6   | GeneID:11118     | <i>BTN3A2</i>       | 26365398 | 26378548 | rs2072803   | 26392515 | 1.58E-10       | 1.21E-07      | 76.98831138         | 7.56368E-16 |
| 6   | GeneID:8364      | <i>HIST1H4C</i>     | 26104176 | 26104565 | rs2237228   | 26104630 | 5.85E-08       | 3.50E-10      | 76.85268211         | 8.08051E-16 |
| 6   | GeneID:394254    | <i>GPR89P</i>       | 27704354 | 27706293 | rs13202291  | 27698857 | 1.60E-07       | 1.30E-10      | 76.82036394         | 8.20878E-16 |
| 6   | GeneID:387036    | <i>GUSBP2</i>       | 26839266 | 26924333 | rs77666565  | 26851415 | 2.51E-09       | 8.36E-09      | 76.80431783         | 8.27321E-16 |
| 17  | GeneID:100132570 | <i>LOC100132570</i> | 44344293 | 44347172 | rs117629202 | 44344596 | 1.38E-15       | 1.73E-02      | 76.54288482         | 9.39725E-16 |
| 6   | GeneID:8334      | <i>HIST1H2AC</i>    | 26124373 | 26124918 | rs13200797  | 26122957 | 7.26E-08       | 3.37E-10      | 76.50160434         | 9.58818E-16 |
| 6   | GeneID:8347      | <i>HIST1H2BC</i>    | 26123695 | 26124132 | rs13200797  | 26122957 | 7.28E-08       | 3.38E-10      | 76.48848707         | 9.64966E-16 |
| 6   | GeneID:3077      | <i>HFE</i>          | 26087509 | 26095469 | rs71557316  | 26072981 | 4.78E-08       | 5.29E-10      | 76.43504736         | 9.90423E-16 |
| Chr | Gene.id          | Name                | Start    | End      | SNP.id      | SNP.pos  | pval(headache) | pval(hypoPAN) | X <sup>2</sup> ,4df | FCP         |

| 6   | GeneID:94026     | <i>POM121L2</i>     | 27276842 | 27280011 | rs56114371  | 27274834 | 2.66E-08       | 9.85E-10      | 76.36481813         | 1.0249E-15  |
|-----|------------------|---------------------|----------|----------|-------------|----------|----------------|---------------|---------------------|-------------|
| 6   | GeneID:100379623 | <i>LOC100379623</i> | 26164261 | 26168404 | rs17598658  | 26175866 | 8.29E-08       | 3.23E-10      | 76.31475282         | 1.05021E-15 |
| 6   | GeneID:387320    | <i>VN1R14P</i>      | 26631313 | 26631964 | rs67777156  | 26633711 | 1.99E-09       | 1.58E-08      | 75.99116658         | 1.22954E-15 |
| 6   | GeneID:3017      | <i>HIST1H2BD</i>    | 26158349 | 26171577 | rs17598658  | 26175866 | 1.06E-07       | 4.13E-10      | 75.33739384         | 1.69064E-15 |
| 6   | GeneID:85303     | <i>HIST1H2APS2</i>  | 25882154 | 25882644 | rs13208859  | 25894609 | 4.48E-08       | 1.07E-09      | 75.15206084         | 1.85035E-15 |
| 17  | GeneID:644354    | <i>LOC644354</i>    | 43578301 | 43578645 | rs189777036 | 43574229 | 1.73E-15       | 2.86E-02      | 75.0882999          | 1.90872E-15 |
| 6   | GeneID:10246     | <i>SLC17A2</i>      | 25912982 | 25930946 | rs35169013  | 25918027 | 4.09E-08       | 1.22E-09      | 75.06714309         | 1.92848E-15 |
| 6   | GeneID:100652981 | <i>LOC100652981</i> | 26854360 | 26854727 | rs77666565  | 26851415 | 1.36E-09       | 3.69E-08      | 75.05993199         | 1.93527E-15 |
| 17  | GeneID:55073     | <i>LRRC37A4</i>     | 43583249 | 43597889 | rs189777036 | 43574229 | 1.46E-15       | 3.73E-02      | 74.89222403         | 2.09997E-15 |
| 8   | GeneID:640       | <i>BLK</i>          | 11351521 | 11422108 | rs12549150  | 11422936 | 1.65E-05       | 3.82E-12      | 74.60762715         | 2.41214E-15 |
| 6   | GeneID:10786     | <i>SLC17A3</i>      | 25845328 | 25874471 | rs6913795   | 25848025 | 5.33E-08       | 1.33E-09      | 74.37318102         | 2.70383E-15 |
| 6   | GeneID:8335      | <i>HIST1H2AB</i>    | 26033320 | 26033796 | rs3752417   | 26045905 | 3.79E-08       | 2.02E-09      | 74.21714265         | 2.91726E-15 |
| 6   | GeneID:3006      | <i>HIST1H1C</i>     | 26055968 | 26056699 | rs3752417   | 26045905 | 3.96E-08       | 1.95E-09      | 74.20190483         | 2.93898E-15 |
| 6   | GeneID:8358      | <i>HIST1H3B</i>     | 26031817 | 26032288 | rs3752417   | 26045905 | 3.87E-08       | 2.06E-09      | 74.14132277         | 3.02696E-15 |
| 6   | GeneID:6568      | <i>SLC17A1</i>      | 25783125 | 25832287 | rs9467607   | 25809477 | 3.82E-08       | 2.31E-09      | 73.93606086         | 3.34508E-15 |
| 8   | GeneID:9258      | <i>MFHAS1</i>       | 8641999  | 8751131  | rs7013471   | 8687325  | 8.85E-05       | 1.21E-12      | 73.54358354         | 4.04931E-15 |
| 6   | GeneID:8352      | <i>HIST1H3C</i>     | 26045639 | 26046097 | rs3752417   | 26045905 | 3.84E-08       | 2.97E-09      | 73.41908965         | 4.30228E-15 |
| 6   | GeneID:10341     | <i>HIST1H2APS5</i>  | 26044128 | 26044778 | rs3752417   | 26045905 | 3.85E-08       | 2.98E-09      | 73.40736564         | 4.3269E-15  |
| 6   | GeneID:100270746 | <i>LOC100270746</i> | 26987145 | 26988085 | rs13217285  | 26999845 | 4.70E-09       | 2.45E-08      | 73.40587539         | 4.33004E-15 |
| 6   | GeneID:3018      | <i>HIST1H2BB</i>    | 26043455 | 26043885 | rs3752417   | 26045905 | 3.94E-08       | 3.05E-09      | 73.31347735         | 4.52922E-15 |
| 6   | GeneID:100189028 | <i>TRNAI2</i>       | 26988125 | 26988218 | rs13217285  | 26999845 | 4.86E-09       | 2.53E-08      | 73.27108554         | 4.62364E-15 |
| 17  | GeneID:9842      | <i>PLEKHM1</i>      | 43513266 | 43568146 | rs189777036 | 43574229 | 3.43E-15       | 3.98E-02      | 73.06042555         | 5.12284E-15 |
| 6   | GeneID:387321    | <i>VN1R12P</i>      | 27001125 | 27002122 | rs35741362  | 27007687 | 4.07E-09       | 3.36E-08      | 73.05815502         | 5.12851E-15 |
| 6   | GeneID:10338     | <i>HIST1H1PS2</i>   | 26016335 | 26017069 | rs10484435  | 26031811 | 7.15E-08       | 1.99E-09      | 72.97847872         | 5.33128E-15 |
| 6   | GeneID:3024      | <i>HIST1H1A</i>     | 26017260 | 26018040 | rs10484435  | 26031811 | 7.42E-08       | 2.06E-09      | 72.83240842         | 5.72405E-15 |
| 6   | GeneID:100131289 | <i>LOC100131289</i> | 27729523 | 27730966 | rs35501037  | 27739566 | 1.70E-07       | 9.06E-10      | 72.81917596         | 5.76103E-15 |
| 6   | GeneID:8366      | <i>HIST1H4B</i>     | 26027124 | 26027480 | rs10484435  | 26031811 | 7.48E-08       | 2.08E-09      | 72.79749726         | 5.82212E-15 |
| 6   | GeneID:221527    | <i>ZBTB12</i>       | 31867394 | 31869769 | rs115062572 | 31862876 | 1.46E-02       | 1.10E-14      | 72.73488804         | 6.00224E-15 |
| Chr | Gene.id          | Name                | Start    | End      | SNP.id      | SNP.pos  | pval(headache) | pval(hypoPAN) | X <sup>2</sup> ,4df | FCP         |

| 6   | GeneID:8350      | <i>HIST1H3A</i>     | 26020718 | 26021186 | rs10484435  | 26031811 | 7.65E-08       | 2.13E-09      | 72.7111107          | 6.07209E-15 |
|-----|------------------|---------------------|----------|----------|-------------|----------|----------------|---------------|---------------------|-------------|
| 6   | GeneID:8359      | <i>HIST1H4A</i>     | 26021907 | 26022278 | rs10484435  | 26031811 | 7.66E-08       | 2.13E-09      | 72.70531909         | 6.08923E-15 |
| 6   | GeneID:791230    | <i>TRNAV7</i>       | 27721179 | 27721251 | rs17693963  | 27710165 | 1.55E-07       | 1.10E-09      | 72.61841511         | 6.35225E-15 |
| 6   | GeneID:10475     | <i>TRIM38</i>       | 25963071 | 25985358 | rs13203673  | 25979122 | 7.55E-08       | 2.30E-09      | 72.58020918         | 6.47145E-15 |
| 6   | GeneID:100189067 | <i>TRNAL10</i>      | 27198334 | 27198416 | rs4713071   | 27187919 | 5.29E-10       | 3.87E-07      | 72.24975746         | 7.60028E-15 |
| 17  | GeneID:9884      | <i>LRRC37A</i>      | 44372497 | 44415160 | rs2458218   | 44361383 | 6.20E-15       | 3.40E-02      | 72.19211396         | 7.81645E-15 |
| 6   | GeneID:10050     | <i>SLC17A4</i>      | 25754927 | 25781403 | rs13200921  | 25790378 | 3.74E-08       | 7.56E-09      | 71.60596751         | 1.03955E-14 |
| 8   | GeneID:137075    | <i>CLDN23</i>       | 8559666  | 8561617  | rs1109618   | 8571364  | 5.89E-05       | 5.23E-12      | 71.43558538         | 1.12937E-14 |
| 6   | GeneID:100189310 | <i>TRNAI17</i>      | 27205350 | 27205423 | rs35589403  | 27219491 | 9.44E-10       | 3.84E-07      | 71.10871208         | 1.32397E-14 |
| 6   | GeneID:10590     | <i>SCGN</i>         | 25652429 | 25702011 | rs35436081  | 25700342 | 6.86E-08       | 5.57E-09      | 71.00429062         | 1.39294E-14 |
| 6   | GeneID:10279     | <i>PRSSI6</i>       | 27215502 | 27224399 | rs35589403  | 27219491 | 1.09E-09       | 3.94E-07      | 70.76620882         | 1.56391E-14 |
| 6   | GeneID:3010      | <i>HIST1H1T</i>     | 26107640 | 26108364 | rs2237228   | 26104630 | 8.76E-08       | 5.99E-09      | 70.36780148         | 1.8982E-14  |
| 6   | GeneID:100189014 | <i>TRNAV12</i>      | 27203288 | 27203360 | rs13212921  | 27205422 | 1.91E-09       | 3.73E-07      | 69.75199792         | 2.56065E-14 |
| 6   | GeneID:58530     | <i>LY6G6D</i>       | 31683133 | 31685581 | rs148571474 | 31672712 | 1.03E-02       | 7.97E-14      | 69.4733411          | 2.93204E-14 |
| 6   | GeneID:79136     | <i>LY6G6E</i>       | 31679753 | 31681842 | rs148571474 | 31672712 | 1.05E-02       | 8.12E-14      | 69.40261298         | 3.03458E-14 |
| 17  | GeneID:100423004 | <i>MIR4315-1</i>    | 43552729 | 43552801 | rs148269941 | 43540472 | 4.35E-14       | 2.06E-02      | 69.30272625         | 3.18552E-14 |
| 6   | GeneID:221613    | <i>HIST1H2AA</i>    | 25726291 | 25726790 | rs34493019  | 25714959 | 1.72E-07       | 5.36E-09      | 69.24491686         | 3.27628E-14 |
| 6   | GeneID:255626    | <i>HIST1H2BA</i>    | 25727137 | 25727573 | rs34493019  | 25714959 | 1.75E-07       | 5.47E-09      | 69.16351259         | 3.40849E-14 |
| 6   | GeneID:100616230 | <i>MIR4646</i>      | 31668806 | 31668868 | rs148571474 | 31672712 | 1.18E-02       | 9.12E-14      | 68.93675252         | 3.80553E-14 |
| 6   | GeneID:259215    | <i>LY6G6F</i>       | 31674684 | 31678372 | rs148571474 | 31672712 | 1.28E-02       | 9.94E-14      | 68.59072053         | 4.50227E-14 |
| 6   | GeneID:7920      | <i>ABHD16A</i>      | 31654726 | 31671137 | rs148571474 | 31672712 | 1.29E-02       | 1.00E-13      | 68.55457508         | 4.58203E-14 |
| 6   | GeneID:7231      | <i>TRNAR2</i>       | 26537726 | 26537798 | rs66941101  | 26530376 | 5.18E-10       | 2.83E-06      | 68.31505735         | 5.14745E-14 |
| 6   | GeneID:100189227 | <i>TRNAV21</i>      | 26538282 | 26538354 | rs66941101  | 26530376 | 5.21E-10       | 2.84E-06      | 68.29066969         | 5.20879E-14 |
| 17  | GeneID:4905      | <i>NSF</i>          | 44668035 | 44834830 | rs1378358   | 44787312 | 1.04E-13       | 1.89E-02      | 67.72021834         | 6.87179E-14 |
| 6   | GeneID:100189288 | <i>TRNAL26</i>      | 26521436 | 26521518 | rs66941101  | 26530376 | 5.88E-10       | 3.48E-06      | 67.64696618         | 7.12066E-14 |
| 6   | GeneID:100189319 | <i>TRNAT14</i>      | 26533145 | 26533218 | rs66941101  | 26530376 | 6.04E-10       | 3.51E-06      | 67.57656537         | 7.36832E-14 |
| 19  | GeneID:100507004 | <i>LOC100507004</i> | 4800220  | 4801278  | rs115654559 | 4797674  | 2.77E-02       | 7.93E-14      | 67.50487334         | 7.62936E-14 |
| 6   | GeneID:3139      | <i>HLA-L</i>        | 30227339 | 30234728 | rs188226252 | 30236078 | 2.40E-02       | 1.04E-13      | 67.25031481         | 8.63319E-14 |
| Chr | Gene.id          | Name                | Start    | End      | SNP.id      | SNP.pos  | pval(headache) | pval(hypoPAN) | X <sup>2</sup> ,4df | FCP         |

| 6   | GeneID:10473     | <i>HMGN4</i>        | 26538572  | 26547165  | rs66941101  | 26530376  | 7.01E-10       | 3.83E-06      | 67.10208659         | 9.27744E-14 |
|-----|------------------|---------------------|-----------|-----------|-------------|-----------|----------------|---------------|---------------------|-------------|
| 6   | GeneID:80741     | <i>LY6G5C</i>       | 31644461  | 31648150  | rs114733011 | 31631531  | 8.54E-03       | 3.22E-13      | 67.05192598         | 9.50616E-14 |
| 6   | GeneID:493812    | <i>HCG11</i>        | 26521934  | 26527621  | rs66941101  | 26530376  | 7.02E-10       | 4.15E-06      | 66.93923993         | 1.00407E-13 |
| 6   | GeneID:100189308 | <i>TRNAA29</i>      | 26553731  | 26553802  | rs34246779  | 26549212  | 1.07E-09       | 2.77E-06      | 66.89614931         | 1.0253E-13  |
| 6   | GeneID:100189223 | <i>TRNAP13</i>      | 26555498  | 26555569  | rs34246779  | 26549212  | 1.10E-09       | 2.84E-06      | 66.80093787         | 1.0738E-13  |
| 6   | GeneID:100189110 | <i>TRNAK14</i>      | 26556774  | 26556846  | rs34246779  | 26549212  | 1.11E-09       | 2.86E-06      | 66.77554168         | 1.08712E-13 |
| 6   | GeneID:100189153 | <i>TRNAI9</i>       | 26554350  | 26554423  | rs34246779  | 26549212  | 1.13E-09       | 2.91E-06      | 66.70367207         | 1.12572E-13 |
| 8   | GeneID:83648     | <i>FAM167A</i>      | 11278973  | 11324276  | rs11775149  | 11335242  | 3.34E-04       | 1.02E-11      | 66.61575546         | 1.17481E-13 |
| 6   | GeneID:100189369 | <i>TRNAA37</i>      | 26682715  | 26682787  | rs149123117 | 26670618  | 3.78E-10       | 9.50E-06      | 66.52260412         | 1.22915E-13 |
| 6   | GeneID:352996    | <i>P5-04</i>        | 29910314  | 29910426  | rs2524005   | 29899677  | 3.23E-04       | 1.12E-11      | 66.50836557         | 1.23767E-13 |
| 6   | GeneID:3105      | <i>HLA-A</i>        | 29910247  | 29913661  | rs2524005   | 29899677  | 3.23E-04       | 1.12E-11      | 66.50378866         | 1.24042E-13 |
| 6   | GeneID:387322    | <i>VNIR13P</i>      | 27028149  | 27029046  | rs35608615  | 27040402  | 2.60E-09       | 1.48E-06      | 66.38930653         | 1.3113E-13  |
| 6   | GeneID:353003    | <i>HCG4P5</i>       | 29908689  | 29909578  | rs2524005   | 29899677  | 3.36E-04       | 1.17E-11      | 66.34179656         | 1.34189E-13 |
| 6   | GeneID:352965    | <i>HLA-U</i>        | 29901541  | 29902657  | rs2524005   | 29899677  | 3.42E-04       | 1.19E-11      | 66.27643922         | 1.38514E-13 |
| 6   | GeneID:100126501 | <i>TRNAA-AGC</i>    | 26796006  | 26796078  | rs7454868   | 26799828  | 3.57E-10       | 1.21E-05      | 66.14675366         | 1.47513E-13 |
| 6   | GeneID:352995    | <i>P5.8</i>         | 29903015  | 29904157  | rs2524005   | 29899677  | 3.59E-04       | 1.25E-11      | 66.08099057         | 1.52297E-13 |
| 6   | GeneID:100189391 | <i>TRNAM20</i>      | 26766444  | 26766516  | rs13213200  | 26755915  | 2.73E-10       | 1.68E-05      | 66.02992674         | 1.56118E-13 |
| 6   | GeneID:404024    | <i>TRIM26P1</i>     | 30206078  | 30210056  | rs191662147 | 30211196  | 2.79E-02       | 1.77E-13      | 65.8848972          | 1.67502E-13 |
| 6   | GeneID:100419971 | <i>LOC100419971</i> | 25679007  | 25679651  | rs13191296  | 25684606  | 4.57E-07       | 1.22E-08      | 65.64115328         | 1.88532E-13 |
| 6   | GeneID:100189358 | <i>TRNAA36</i>      | 26673590  | 26673662  | rs149123117 | 26670618  | 4.92E-10       | 1.24E-05      | 65.4632486          | 2.05529E-13 |
| 6   | GeneID:100189354 | <i>TRNAM19</i>      | 26758550  | 26758622  | rs13213200  | 26755915  | 3.16E-10       | 1.95E-05      | 65.44680247         | 2.07176E-13 |
| 10  | GeneID:5654      | <i>HTRA1</i>        | 124221041 | 124274424 | rs2223089   | 124210160 | 2.31E-11       | 2.87E-04      | 65.29164109         | 2.23373E-13 |
| 6   | GeneID:100507100 | <i>LOC100507100</i> | 26681354  | 26688069  | rs149123117 | 26670618  | 5.23E-10       | 1.32E-05      | 65.21835492         | 2.31458E-13 |
| 10  | GeneID:387715    | <i>ARMS2</i>        | 124214179 | 124216868 | rs78438709  | 124201071 | 3.62E-12       | 1.91E-03      | 65.2068932          | 2.32748E-13 |
| 6   | GeneID:7932      | <i>OR2H2</i>        | 29555683  | 29556745  | rs115440940 | 29562188  | 7.16E-03       | 1.13E-12      | 64.89359753         | 2.7095E-13  |
| 8   | GeneID:79660     | <i>PPP1R3B</i>      | 8993764   | 9009152   | rs330943    | 9021026   | 9.14E-08       | 8.97E-08      | 64.86832971         | 2.74291E-13 |
| 6   | GeneID:692092    | <i>SNORD32B</i>     | 29550029  | 29550105  | rs115440940 | 29562188  | 7.32E-03       | 1.16E-12      | 64.8068531          | 2.82593E-13 |
| 6   | GeneID:387043    | <i>RPL13AP</i>      | 29550285  | 29550802  | rs115440940 | 29562188  | 7.32E-03       | 1.16E-12      | 64.80657806         | 2.82631E-13 |
| Chr | Gene.id          | Name                | Start     | End       | SNP.id      | SNP.pos   | pval(headache) | pval(hypoPAN) | X <sup>2</sup> ,4df | FCP         |

| 6   | GeneID:100189156 | <i>TRNA<sup>A</sup>20</i> | 26771290  | 26771362  | rs34244947  | 26761745  | 7.29E-10       | 1.27E-05      | 64.63383982         | 3.0733E-13  |
|-----|------------------|---------------------------|-----------|-----------|-------------|-----------|----------------|---------------|---------------------|-------------|
| 6   | GeneID:100130756 | <i>UQCRHP1</i>            | 31578860  | 31579133  | rs2736188   | 31565648  | 1.07E-02       | 8.80E-13      | 64.58897804         | 3.1409E-13  |
| 8   | GeneID:157285    | <i>SGK223</i>             | 8175258   | 8239257   | rs7005904   | 8218597   | 1.53E-03       | 6.30E-12      | 64.54656573         | 3.20617E-13 |
| 8   | GeneID:100419209 | <i>LOC100419209</i>       | 10332392  | 10356247  | rs4841356   | 10334694  | 2.36E-06       | 4.67E-09      | 64.27553442         | 3.65652E-13 |
| 6   | GeneID:3109      | <i>HLA-DMB</i>            | 32902406  | 32908847  | rs73396802  | 32915797  | 1.55E-03       | 8.26E-12      | 63.97763184         | 4.22474E-13 |
| 8   | GeneID:4482      | <i>MSRA</i>               | 9911830   | 10286401  | rs7818437   | 10209623  | 1.78E-05       | 7.39E-10      | 63.92782745         | 4.328E-13   |
| 6   | GeneID:353002    | <i>HCG4P4</i>             | 29922982  | 29923410  | rs116174003 | 29928557  | 1.83E-03       | 7.20E-12      | 63.91908354         | 4.34639E-13 |
| 6   | GeneID:3138      | <i>HLA-K</i>              | 29894436  | 29897616  | rs2524005   | 29899677  | 3.34E-04       | 3.96E-11      | 63.91532117         | 4.35432E-13 |
| 6   | GeneID:352966    | <i>HLA-W</i>              | 29923611  | 29926835  | rs116174003 | 29928557  | 1.84E-03       | 7.23E-12      | 63.90494364         | 4.37629E-13 |
| 6   | GeneID:352994    | <i>P5-05</i>              | 29894219  | 29894350  | rs2524005   | 29899677  | 3.24E-04       | 4.11E-11      | 63.90161452         | 4.38336E-13 |
| 6   | GeneID:80868     | <i>HCG4B</i>              | 29892369  | 29893428  | rs2524005   | 29899677  | 3.31E-04       | 4.20E-11      | 63.81052308         | 4.58127E-13 |
| 6   | GeneID:353004    | <i>HCG4P7</i>             | 29853887  | 29854784  | rs114222883 | 29854585  | 7.54E-04       | 1.87E-11      | 63.78693636         | 4.63396E-13 |
| 6   | GeneID:2550      | <i>GABBR1</i>             | 29570005  | 29600962  | rs115440940 | 29562188  | 1.08E-02       | 1.71E-12      | 63.23608924         | 6.05223E-13 |
| 4   | GeneID:7098      | <i>TLR3</i>               | 186990309 | 187006252 | rs28811953  | 186980866 | 2.88E-02       | 6.45E-13      | 63.23234352         | 6.06323E-13 |
| 6   | GeneID:352991    | <i>P5-09</i>              | 29855513  | 29855662  | rs114222883 | 29854585  | 7.46E-04       | 2.63E-11      | 63.12062935         | 6.40056E-13 |
| 6   | GeneID:3136      | <i>HLA-H</i>              | 29855383  | 29858856  | rs114222883 | 29854585  | 7.46E-04       | 2.63E-11      | 63.12042121         | 6.40121E-13 |
| 17  | GeneID:7473      | <i>WNT3</i>               | 44841686  | 44896082  | rs199533    | 44828931  | 8.09E-13       | 2.71E-02      | 62.90652739         | 7.10035E-13 |
| 12  | GeneID:6231      | <i>RPS26</i>              | 56435686  | 56438007  | rs1702877   | 56427808  | 9.88E-05       | 3.10E-10      | 62.23434919         | 9.83377E-13 |
| 12  | GeneID:488       | <i>ATP2A2</i>             | 110719032 | 110788898 | rs73206853  | 110708746 | 1.46E-10       | 2.36E-04      | 61.99254631         | 1.10558E-12 |
| 12  | GeneID:8759      | <i>ADAMI</i>              | 112336867 | 112339706 | rs12296574  | 112322777 | 2.78E-02       | 1.31E-12      | 61.88947271         | 1.16217E-12 |
| 8   | GeneID:83650     | <i>SLC35G5</i>            | 11188495  | 11189695  | rs7837036   | 11175489  | 1.33E-03       | 3.22E-11      | 61.56797334         | 1.35798E-12 |
| 12  | GeneID:64375     | <i>IKZF4</i>              | 56414689  | 56432219  | rs1702877   | 56427808  | 1.18E-04       | 3.70E-10      | 61.52226919         | 1.38837E-12 |
| 6   | GeneID:55604     | <i>LRRC16A</i>            | 25279656  | 25620758  | rs927985    | 25412811  | 2.27E-06       | 1.99E-08      | 61.45589985         | 1.43372E-12 |
| 12  | GeneID:28981     | <i>IFT81</i>              | 110562140 | 110656600 | rs60013768  | 110576095 | 4.66E-10       | 1.04E-04      | 61.31034672         | 1.53841E-12 |
| 6   | GeneID:80863     | <i>PRRT1</i>              | 32116140  | 32119720  | rs192471087 | 32119730  | 2.26E-03       | 2.27E-11      | 61.20139777         | 1.62174E-12 |
| 12  | GeneID:6821      | <i>SUOX</i>               | 56391043  | 56399309  | rs1701704   | 56412487  | 1.79E-04       | 2.91E-10      | 61.17571769         | 1.64203E-12 |
| 8   | GeneID:100505734 | <i>LOC100505734</i>       | 11173368  | 11182938  | rs7837036   | 11175489  | 1.62E-03       | 4.20E-11      | 60.63344364         | 2.13497E-12 |
| 12  | GeneID:100131294 | <i>LOC100131294</i>       | 56373755  | 56374851  | rs773109    | 56374695  | 2.24E-04       | 3.20E-10      | 60.53157031         | 2.24288E-12 |
| Chr | Gene.id          | Name                      | Start     | End       | SNP.id      | SNP.pos   | pval(headache) | pval(hypoPAN) | X <sup>2</sup> ,4df | FCP         |



| 8   | GeneID:100420053 | <i>LOC100420053</i> | 10194293  | 10195166  | rs7818437   | 10209623  | 2.36E-06       | 3.47E-08      | 60.26503891         | 2.55169E-12 |
|-----|------------------|---------------------|-----------|-----------|-------------|-----------|----------------|---------------|---------------------|-------------|
| 12  | GeneID:400073    | <i>C12orf76</i>     | 110478983 | 110505500 | rs67974983  | 110519237 | 2.15E-09       | 3.85E-05      | 60.24382763         | 2.57801E-12 |
| 12  | GeneID:2065      | <i>ERBB3</i>        | 56473809  | 56497291  | rs2292239   | 56482180  | 2.89E-04       | 3.23E-10      | 60.00077276         | 2.89978E-12 |
| 8   | GeneID:83656     | <i>C8orf12</i>      | 11225911  | 11296166  | rs12156009  | 11285219  | 3.04E-03       | 3.22E-11      | 59.9111223          | 3.02833E-12 |
| 8   | GeneID:66036     | <i>MTMR9</i>        | 11142000  | 11185655  | rs10098488  | 11130977  | 1.63E-03       | 6.40E-11      | 59.78201185         | 3.22354E-12 |
| 8   | GeneID:613211    | <i>DEFB134</i>      | 11851489  | 11853760  | rs117672255 | 11867580  | 4.15E-03       | 2.85E-11      | 59.53070345         | 3.64027E-12 |
| 8   | GeneID:645960    | <i>LOC645960</i>    | 8819254   | 8819633   | rs7821807   | 8805612   | 3.98E-06       | 3.13E-08      | 59.42943084         | 3.82305E-12 |
| 12  | GeneID:5869      | <i>RAB5B</i>        | 56367862  | 56388490  | rs773109    | 56374695  | 3.21E-04       | 4.05E-10      | 59.33841287         | 3.99512E-12 |
| 1   | GeneID:54507     | <i>ADAMTSL4</i>     | 150521898 | 150533413 | rs6693567   | 150510660 | 3.90E-11       | 4.09E-03      | 58.93062346         | 4.86613E-12 |
| 8   | GeneID:286043    | <i>MRPS18CP2</i>    | 8791228   | 8791520   | rs878504    | 8783506   | 1.39E-06       | 1.23E-07      | 58.78818228         | 5.21312E-12 |
| 1   | GeneID:100422997 | <i>MIR4257</i>      | 150524405 | 150524490 | rs6693567   | 150510660 | 3.05E-11       | 6.01E-03      | 58.65249522         | 5.56661E-12 |
| 12  | GeneID:1017      | <i>CDK2</i>         | 56360556  | 56366568  | rs773109    | 56374695  | 2.73E-04       | 6.85E-10      | 58.61498702         | 5.66849E-12 |
| 4   | GeneID:4299      | <i>AFF1</i>         | 87856154  | 88062206  | rs342458    | 88060025  | 3.17E-07       | 7.72E-07      | 58.07585682         | 7.35627E-12 |
| 8   | GeneID:613209    | <i>DEFB135</i>      | 11839830  | 11842099  | rs79321779  | 11849367  | 2.41E-02       | 1.45E-11      | 57.36064676         | 1.03935E-11 |
| 8   | GeneID:392193    | <i>RPL19P13</i>     | 11113499  | 11114187  | rs958648    | 11103895  | 7.03E-04       | 5.64E-10      | 57.11212823         | 1.17194E-11 |
| 12  | GeneID:6490      | <i>PMEL</i>         | 56347889  | 56360496  | rs773109    | 56374695  | 3.26E-04       | 1.37E-09      | 56.86646843         | 1.3196E-11  |
| 12  | GeneID:79600     | <i>TCTN1</i>        | 111051832 | 111086935 | rs146921795 | 111044793 | 6.38E-09       | 7.53E-05      | 56.72963724         | 1.40975E-11 |
| 17  | GeneID:147040    | <i>KCTD11</i>       | 7255208   | 7258263   | rs3809831   | 7257669   | 4.70E-02       | 1.04E-11      | 56.69969923         | 1.43029E-11 |
| 12  | GeneID:84329     | <i>HVCN1</i>        | 111086491 | 111127617 | rs7961345   | 111081598 | 8.12E-09       | 7.26E-05      | 56.31958215         | 1.71847E-11 |
| 8   | GeneID:157739    | <i>TDH</i>          | 11197146  | 11225961  | rs17797894  | 11212081  | 1.91E-03       | 3.49E-10      | 56.07154967         | 1.9371E-11  |
| 11  | GeneID:100507164 | <i>LOC100507164</i> | 35231590  | 35236568  | rs76276019  | 35239888  | 5.07E-03       | 1.98E-10      | 55.25583974         | 2.87168E-11 |
| 12  | GeneID:100653008 | <i>LOC100653008</i> | 56494149  | 56511615  | rs2292239   | 56482180  | 2.54E-04       | 4.06E-09      | 55.20180808         | 2.94754E-11 |
| 8   | GeneID:100616350 | <i>MIR4660</i>      | 8905955   | 8906028   | rs2953805   | 8914757   | 2.63E-05       | 3.96E-08      | 55.18242076         | 2.97524E-11 |
| 12  | GeneID:144712    | <i>HMGA1P3</i>      | 110866403 | 110868198 | rs147356273 | 110876462 | 2.81E-09       | 3.82E-04      | 55.11658635         | 3.07127E-11 |
| 12  | GeneID:160760    | <i>PPTC7</i>        | 110972237 | 111021064 | rs148331092 | 111018167 | 4.98E-09       | 3.82E-04      | 53.97814936         | 5.31842E-11 |
| 12  | GeneID:51434     | <i>ANAPC7</i>       | 110810705 | 110841535 | rs140441196 | 110802707 | 5.02E-09       | 3.83E-04      | 53.95439415         | 5.37968E-11 |
| 12  | GeneID:100129882 | <i>RPL31P49</i>     | 110898765 | 110899206 | rs148167533 | 110909778 | 3.67E-09       | 5.43E-04      | 53.88513693         | 5.56234E-11 |
| 2   | GeneID:6772      | <i>STAT1</i>        | 191833762 | 191878976 | rs148933924 | 191827528 | 1.47E-02       | 1.59E-10      | 53.56983404         | 6.47541E-11 |
| Chr | Gene.id          | Name                | Start     | End       | SNP.id      | SNP.pos   | pval(headache) | pval(hypoPAN) | X <sup>2</sup> ,4df | FCP         |

| 18  | GeneID:5771      | <i>PTPN2</i>        | 12785477  | 12884334  | rs72872144  | 12889046  | 1.05E-02       | 2.53E-10      | 53.30441806         | 7.35906E-11 |
|-----|------------------|---------------------|-----------|-----------|-------------|-----------|----------------|---------------|---------------------|-------------|
| 12  | GeneID:51184     | <i>GPN3</i>         | 110890291 | 110906526 | rs147356273 | 110876462 | 3.39E-09       | 7.90E-04      | 53.29238537         | 7.40186E-11 |
| 12  | GeneID:10094     | <i>ARPC3</i>        | 110872706 | 110888158 | rs147356273 | 110876462 | 3.18E-09       | 1.21E-03      | 52.56558828         | 1.05055E-10 |
| 12  | GeneID:29902     | <i>C12orf24</i>     | 110906232 | 110928192 | rs118053970 | 110932820 | 4.73E-09       | 8.67E-04      | 52.44102172         | 1.11551E-10 |
| 12  | GeneID:144715    | <i>RAD9B</i>        | 110940005 | 110969891 | rs118053970 | 110932820 | 5.04E-09       | 8.66E-04      | 52.31383092         | 1.18598E-10 |
| 8   | GeneID:1508      | <i>CTSB</i>         | 11700033  | 11725646  | rs1293298   | 11712443  | 4.96E-04       | 9.07E-09      | 52.2541455          | 1.22056E-10 |
| 13  | GeneID:432369    | <i>ATP5EP2</i>      | 28519343  | 28519710  | rs9579134   | 28508988  | 4.55E-03       | 1.00E-09      | 52.22572217         | 1.23738E-10 |
| 6   | GeneID:100188987 | <i>TRNAH3</i>       | 27125906  | 27125977  | rs67540232  | 27140866  | 4.78E-10       | 1.00E-02      | 52.12760504         | 1.29725E-10 |
| 8   | GeneID:100421446 | <i>LOC100421446</i> | 11856339  | 11857014  | rs117672255 | 11867580  | 3.92E-03       | 1.40E-09      | 51.85251006         | 1.48097E-10 |
| 1   | GeneID:23248     | <i>RPRD2</i>        | 150336990 | 150449042 | rs698915    | 150388318 | 2.45E-10       | 2.27E-02      | 51.82515889         | 1.5006E-10  |
| 3   | GeneID:1237      | <i>CCR8</i>         | 39371197  | 39375171  | rs77200706  | 39384057  | 4.39E-03       | 1.34E-09      | 51.70906078         | 1.58686E-10 |
| 6   | GeneID:100422934 | <i>MIR3143</i>      | 27115405  | 27115467  | rs61240102  | 27124904  | 6.22E-10       | 9.52E-03      | 51.7041345          | 1.59062E-10 |
| 6   | GeneID:85235     | <i>HIST1H2AH</i>    | 27114908  | 27115346  | rs61240102  | 27124904  | 6.22E-10       | 9.52E-03      | 51.70394676         | 1.59077E-10 |
| 12  | GeneID:51699     | <i>VPS29</i>        | 110929330 | 110939916 | rs118053970 | 110932820 | 3.96E-09       | 1.50E-03      | 51.69282895         | 1.5993E-10  |
| 6   | GeneID:100189196 | <i>TRNAV20</i>      | 27118022  | 27118094  | rs61240102  | 27124904  | 6.31E-10       | 9.66E-03      | 51.64553072         | 1.63613E-10 |
| 8   | GeneID:286046    | <i>XKR6</i>         | 10753654  | 11058875  | rs17722940  | 10898459  | 1.23E-03       | 5.10E-09      | 51.58508265         | 1.68444E-10 |
| 6   | GeneID:8294      | <i>HIST1H4I</i>     | 27107088  | 27107457  | rs67330695  | 27103654  | 6.42E-10       | 1.06E-02      | 51.42840431         | 1.81638E-10 |
| 8   | GeneID:90459     | <i>ERII</i>         | 8860314   | 8890849   | rs2956244   | 8885166   | 1.68E-04       | 5.39E-08      | 50.85163961         | 2.39737E-10 |
| 8   | GeneID:402333    | <i>OR7E160P</i>     | 11855115  | 11892149  | rs117672255 | 11867580  | 5.35E-03       | 2.01E-09      | 50.51120892         | 2.82392E-10 |
| 8   | GeneID:2222      | <i>FDFT1</i>        | 11660190  | 11696818  | rs1293296   | 11711157  | 1.06E-03       | 1.32E-08      | 49.98988391         | 3.62847E-10 |
| 8   | GeneID:2626      | <i>GATA4</i>        | 11561717  | 11617509  | rs2409814   | 11606152  | 7.72E-03       | 1.91E-09      | 49.88020152         | 3.82493E-10 |
| 4   | GeneID:645481    | <i>LOC645481</i>    | 26113487  | 26115450  | rs7673206   | 26126838  | 3.78E-02       | 4.16E-10      | 49.74971745         | 4.07253E-10 |
| 13  | GeneID:100132234 | <i>LOC100132234</i> | 28527669  | 28529500  | rs9512935   | 28515327  | 2.01E-02       | 8.51E-10      | 49.58082604         | 4.41691E-10 |
| 6   | GeneID:352993    | <i>HCP5P6</i>       | 29883530  | 29885892  | rs2524005   | 29899677  | 2.56E-04       | 7.56E-08      | 49.33333936         | 4.97475E-10 |
| 12  | GeneID:5501      | <i>PPP1CC</i>       | 111157613 | 111180783 | rs73194035  | 111165793 | 4.46E-08       | 4.73E-04      | 49.16232304         | 5.40079E-10 |
| 11  | GeneID:3992      | <i>FADS1</i>        | 61567097  | 61584529  | rs61897793  | 61599347  | 4.36E-04       | 6.36E-08      | 48.61569246         | 7.0225E-10  |
| 3   | GeneID:645715    | <i>EEF1A1P24</i>    | 39400036  | 39401410  | rs73826410  | 39403292  | 1.81E-03       | 2.08E-08      | 48.00665262         | 9.40775E-10 |
| 6   | GeneID:353014    | <i>HCG4P9</i>       | 29766201  | 29767903  | rs143525179 | 29751998  | 7.75E-06       | 5.48E-06      | 47.76523252         | 1.05635E-09 |
| Chr | Gene.id          | Name                | Start     | End       | SNP.id      | SNP.pos   | pval(headache) | pval(hypoPAN) | X <sup>2</sup> ,4df | FCP         |

| 8   | GeneID:100271154 | <i>RPL17P29</i>   | 11032519  | 11033125  | rs4840551   | 11029039  | 2.01E-03       | 2.16E-08      | 47.72633318         | 1.07625E-09 |
|-----|------------------|-------------------|-----------|-----------|-------------|-----------|----------------|---------------|---------------------|-------------|
| 11  | GeneID:100302263 | <i>MIR1908</i>    | 61582633  | 61582712  | rs968567    | 61595564  | 1.03E-03       | 4.28E-08      | 47.68495973         | 1.09784E-09 |
| 12  | GeneID:642493    | <i>RPL29P25</i>   | 111279361 | 111279808 | rs71458365  | 111274102 | 1.53E-05       | 3.22E-06      | 47.46546491         | 1.21977E-09 |
| 6   | GeneID:221547    | <i>RANP1</i>      | 30453662  | 30454724  | rs115485852 | 30469193  | 3.58E-02       | 1.42E-09      | 47.40291004         | 1.25693E-09 |
| 19  | GeneID:100271529 | <i>RPL39P38</i>   | 18395976  | 18396355  | rs75374192  | 18385125  | 4.95E-02       | 1.07E-09      | 47.31614938         | 1.31035E-09 |
| 11  | GeneID:9415      | <i>FADS2</i>      | 61595713  | 61634825  | rs61897793  | 61599347  | 9.20E-04       | 6.08E-08      | 47.21476344         | 1.37566E-09 |
| 19  | GeneID:100422833 | <i>MIR3188</i>    | 18392887  | 18392971  | rs75374192  | 18385125  | 4.90E-02       | 1.21E-09      | 47.09351099         | 1.45804E-09 |
| 4   | GeneID:4790      | <i>NFKB1</i>      | 103422486 | 103538459 | rs3774968   | 103531112 | 2.47E-02       | 2.43E-09      | 47.07446687         | 1.47141E-09 |
| 6   | GeneID:353008    | <i>3.8-1.3</i>    | 29878012  | 29879177  | rs1632908   | 29893403  | 6.35E-04       | 1.08E-07      | 46.81407262         | 1.66713E-09 |
| 6   | GeneID:3133      | <i>HLA-E</i>      | 30457183  | 30461982  | rs115485852 | 30469193  | 4.25E-02       | 1.69E-09      | 46.71288325         | 1.75001E-09 |
| 6   | GeneID:100421582 | <i>PAIP1P1</i>    | 30154575  | 30156383  | rs188837807 | 30155864  | 1.41E-03       | 5.11E-08      | 46.71164502         | 1.75105E-09 |
| 6   | GeneID:7726      | <i>TRIM26</i>     | 30152232  | 30181271  | rs188837807 | 30155864  | 1.82E-03       | 4.38E-08      | 46.50423624         | 1.93412E-09 |
| 6   | GeneID:554223    | <i>LOC554223</i>  | 29759683  | 29765584  | rs143525179 | 29751998  | 1.07E-05       | 7.55E-06      | 46.48051725         | 1.95624E-09 |
| 19  | GeneID:55527     | <i>FEM1A</i>      | 4791728   | 4795571   | rs115654559 | 4797674   | 3.16E-02       | 2.73E-09      | 46.34464358         | 2.08789E-09 |
| 1   | GeneID:80222     | <i>TARS2</i>      | 150459920 | 150479756 | rs7549396   | 150464603 | 3.32E-09       | 2.72E-02      | 46.25491416         | 2.17964E-09 |
| 18  | GeneID:10666     | <i>CD226</i>      | 67530192  | 67624232  | rs74523488  | 67532869  | 3.94E-03       | 2.44E-08      | 46.12897386         | 2.31525E-09 |
| 3   | GeneID:344697    | <i>HNRNPA1P21</i> | 39376477  | 39377368  | rs77200706  | 39384057  | 3.86E-03       | 2.95E-08      | 45.79492858         | 2.71712E-09 |
| 12  | GeneID:5036      | <i>PA2G4</i>      | 56498103  | 56507694  | rs798829    | 56485269  | 3.46E-04       | 3.62E-07      | 45.60057896         | 2.98224E-09 |
| 6   | GeneID:353016    | <i>HCP5P13</i>    | 29760911  | 29762023  | rs143525179 | 29751998  | 1.01E-05       | 1.43E-05      | 45.31607991         | 3.41757E-09 |
| 11  | GeneID:693196    | <i>MIR611</i>     | 61559967  | 61560033  | rs61896141  | 61556039  | 1.73E-03       | 9.04E-08      | 45.15789827         | 3.68648E-09 |
| 6   | GeneID:352962    | <i>HLA-V</i>      | 29759530  | 29760527  | rs143525179 | 29751998  | 1.07E-05       | 1.51E-05      | 45.09707494         | 3.79541E-09 |
| 6   | GeneID:54435     | <i>HCG4</i>       | 29758808  | 29760850  | rs143525179 | 29751998  | 1.07E-05       | 1.51E-05      | 45.09375306         | 3.80145E-09 |
| 10  | GeneID:118663    | <i>BTBD16</i>     | 124030821 | 124097676 | rs56163147  | 124109797 | 2.36E-07       | 7.13E-04      | 45.01208324         | 3.95303E-09 |
| 11  | GeneID:2237      | <i>FEN1</i>       | 61560109  | 61564716  | rs61896141  | 61556039  | 1.80E-03       | 9.42E-08      | 44.99383205         | 3.98772E-09 |
| 12  | GeneID:84260     | <i>TCHP</i>       | 110338079 | 110355874 | rs116940627 | 110336546 | 4.59E-06       | 3.76E-05      | 44.96176584         | 4.0494E-09  |
| 11  | GeneID:745       | <i>C11orf9</i>    | 61520121  | 61555989  | rs61896068  | 61513400  | 8.45E-04       | 2.06E-07      | 44.94235257         | 4.08721E-09 |
| 11  | GeneID:746       | <i>C11orf10</i>   | 61556602  | 61560085  | rs61896141  | 61556039  | 1.90E-03       | 9.93E-08      | 44.78297489         | 4.41122E-09 |
| 13  | GeneID:3651      | <i>PDX1</i>       | 28494168  | 28500451  | rs7982864   | 28500496  | 3.70E-03       | 5.51E-08      | 44.62652067         | 4.7542E-09  |
| Chr | Gene.id          | Name              | Start     | End       | SNP.id      | SNP.pos   | pval(headache) | pval(hypoPAN) | X <sup>2</sup> ,4df | FCP         |

| 6   | GeneID:100131814 | <i>LINC00271</i>    | 135818939 | 136011976 | rs9376121   | 135965357 | 3.87E-02       | 5.56E-09      | 44.51774415         | 5.00822E-09 |
|-----|------------------|---------------------|-----------|-----------|-------------|-----------|----------------|---------------|---------------------|-------------|
| 8   | GeneID:693182    | <i>MIR597</i>       | 9599182   | 9599278   | rs35169606  | 9604066   | 9.97E-04       | 2.26E-07      | 44.42402964         | 5.2379E-09  |
| 9   | GeneID:7464      | <i>CORO2A</i>       | 100883257 | 100954956 | rs12551475  | 100923751 | 2.10E-03       | 1.10E-07      | 44.36738103         | 5.38181E-09 |
| 16  | GeneID:9114      | <i>ATP6V0D1</i>     | 67471917  | 67515089  | rs72790338  | 67504682  | 1.23E-02       | 1.91E-08      | 44.34050817         | 5.45145E-09 |
| 6   | GeneID:100422429 | <i>LOC100422429</i> | 30929178  | 30929755  | rs143764990 | 30943138  | 2.56E-02       | 1.02E-08      | 44.13050235         | 6.02756E-09 |
| 6   | GeneID:100420530 | <i>LOC100420530</i> | 30931992  | 30933937  | rs143764990 | 30943138  | 2.56E-02       | 1.02E-08      | 44.1215765          | 6.05335E-09 |
| 16  | GeneID:29100     | <i>TMEM208</i>      | 67261016  | 67263182  | rs55691975  | 67250992  | 2.30E-02       | 1.37E-08      | 43.75240882         | 7.22219E-09 |
| 4   | GeneID:260422    | <i>LOC260422</i>    | 87834081  | 87836070  | rs2705620   | 87835616  | 6.05E-04       | 5.61E-07      | 43.60705727         | 7.74194E-09 |
| 3   | GeneID:56983     | <i>POGLUT1</i>      | 119187785 | 119213555 | rs73187899  | 119228515 | 3.87E-02       | 8.77E-09      | 43.60674032         | 7.74311E-09 |
| 16  | GeneID:181       | <i>AGRP</i>         | 67516474  | 67517716  | rs72790338  | 67504682  | 6.88E-03       | 5.92E-08      | 43.24266789         | 9.21493E-09 |
| 8   | GeneID:100128174 | <i>LOC100128174</i> | 11901012  | 11907134  | rs117378333 | 11892737  | 9.98E-03       | 4.09E-08      | 43.24194847         | 9.2181E-09  |
| 8   | GeneID:693183    | <i>MIR598</i>       | 10892716  | 10892812  | rs17722940  | 10898459  | 5.23E-04       | 7.84E-07      | 43.23067984         | 9.26788E-09 |
| 6   | GeneID:135656    | <i>DPCR1</i>        | 30908777  | 30921998  | rs138678612 | 30932223  | 4.97E-02       | 9.21E-09      | 43.00880143         | 1.03045E-08 |
| 3   | GeneID:100302112 | <i>MIR1284</i>      | 71591121  | 71591240  | rs7610856   | 71579022  | 2.84E-07       | 1.64E-03      | 42.97549286         | 1.04697E-08 |
| 12  | GeneID:6171      | <i>RPL41</i>        | 56510374  | 56511616  | rs4759228   | 56508409  | 5.38E-04       | 8.80E-07      | 42.94134944         | 1.06419E-08 |
| 4   | GeneID:643974    | <i>RPL6P13</i>      | 87791318  | 87792586  | rs11722905  | 87791982  | 9.71E-04       | 4.99E-07      | 42.89715898         | 1.0869E-08  |
| 3   | GeneID:51300     | <i>TIMMDC1</i>      | 119217368 | 119243128 | rs73187899  | 119228515 | 4.69E-02       | 1.06E-08      | 42.84102071         | 1.11644E-08 |
| 6   | GeneID:100048904 | <i>DDX39BP1</i>     | 29874324  | 29875226  | rs114298287 | 29865311  | 7.12E-04       | 7.16E-07      | 42.79487695         | 1.14132E-08 |
| 11  | GeneID:100302280 | <i>MIR1237</i>      | 64136074  | 64136175  | rs138662412 | 64125119  | 1.56E-02       | 3.30E-08      | 42.76857416         | 1.15575E-08 |
| 6   | GeneID:6824      | <i>ETFIP1</i>       | 29999490  | 30001654  | rs114315683 | 30012624  | 3.35E-04       | 1.59E-06      | 42.70040717         | 1.194E-08   |
| 6   | GeneID:352964    | <i>HLA-T</i>        | 29864220  | 29866724  | rs114222883 | 29854585  | 7.28E-04       | 7.68E-07      | 42.60831551         | 1.24769E-08 |
| 6   | GeneID:285830    | <i>HLA-F-AS1</i>    | 29694378  | 29716826  | rs183103224 | 29690291  | 4.70E-03       | 1.21E-07      | 42.56846819         | 1.27166E-08 |
| 6   | GeneID:4280      | <i>MICE</i>         | 29709234  | 29716880  | rs62391801  | 29694443  | 6.49E-03       | 9.30E-08      | 42.45863094         | 1.34014E-08 |
| 7   | GeneID:79783     | <i>C7orf10</i>      | 40174575  | 40900366  | rs12532479  | 40427634  | 3.28E-08       | 1.86E-02      | 42.43247172         | 1.35699E-08 |
| 16  | GeneID:29800     | <i>ZDHHC1</i>       | 67428322  | 67450339  | rs189527310 | 67447829  | 4.50E-02       | 1.37E-08      | 42.41691414         | 1.36711E-08 |
| 4   | GeneID:57563     | <i>KLHL8</i>        | 88082214  | 88141674  | rs1466364   | 88068599  | 3.16E-07       | 1.98E-03      | 42.38476721         | 1.38825E-08 |
| 6   | GeneID:100419974 | <i>HMGB1P17</i>     | 135957248 | 135957851 | rs9376121   | 135965357 | 1.38E-02       | 4.69E-08      | 42.32143776         | 1.43087E-08 |
| 12  | GeneID:84872     | <i>ZC3H10</i>       | 56512030  | 56516278  | rs4759228   | 56508409  | 6.44E-04       | 1.05E-06      | 42.22483641         | 1.49841E-08 |
| Chr | Gene.id          | Name                | Start     | End       | SNP.id      | SNP.pos   | pval(headache) | pval(hypoPAN) | X <sup>2</sup> ,4df | FCP         |

| 1   | GeneID:9047      | <i>SH2D2A</i>       | 156776035 | 156786640 | rs2234883   | 156787110 | 2.25E-03       | 3.02E-07      | 42.21685141         | 1.50413E-08 |
|-----|------------------|---------------------|-----------|-----------|-------------|-----------|----------------|---------------|---------------------|-------------|
| 16  | GeneID:26231     | <i>LRRC29</i>       | 67241042  | 67260901  | rs55691975  | 67250992  | 3.64E-02       | 2.18E-08      | 41.90734556         | 1.74358E-08 |
| 11  | GeneID:283234    | <i>CCDC88B</i>      | 64107690  | 64125006  | rs138662412 | 64125119  | 2.92E-02       | 2.81E-08      | 41.84419676         | 1.79693E-08 |
| 6   | GeneID:3008      | <i>HIST1H1E</i>     | 26156559  | 26157343  | rs7749823   | 26158079  | 1.47E-04       | 5.95E-06      | 41.71767399         | 1.90875E-08 |
| 16  | GeneID:29109     | <i>FHOD1</i>        | 67263292  | 67281425  | rs55691975  | 67250992  | 3.90E-02       | 2.33E-08      | 41.64083607         | 1.98002E-08 |
| 1   | GeneID:1893      | <i>ECM1</i>         | 150480487 | 150486265 | rs12031973  | 150485566 | 3.61E-08       | 2.71E-02      | 41.49330066         | 2.1244E-08  |
| 6   | GeneID:100507399 | <i>HCG8</i>         | 29978606  | 29980440  | rs141548494 | 29983301  | 4.59E-04       | 2.29E-06      | 41.35178177         | 2.27275E-08 |
| 12  | GeneID:88455     | <i>ANKRD13A</i>     | 110437235 | 110477237 | rs12312565  | 110449173 | 2.87E-05       | 3.68E-05      | 41.33536959         | 2.29061E-08 |
| 11  | GeneID:8986      | <i>RPS6KA4</i>      | 64126625  | 64139687  | rs138662412 | 64125119  | 2.81E-02       | 3.78E-08      | 41.3284034          | 2.29823E-08 |
| 4   | GeneID:132989    | <i>C4orf36</i>      | 87797358  | 87813575  | rs11722905  | 87791982  | 1.57E-03       | 6.88E-07      | 41.29397227         | 2.33628E-08 |
| 16  | GeneID:51673     | <i>TPPP3</i>        | 67423712  | 67427421  | rs143082214 | 67442216  | 4.74E-02       | 2.80E-08      | 40.87818611         | 2.84853E-08 |
| 11  | GeneID:100129473 | <i>LOC100129473</i> | 61534400  | 61534987  | rs10792318  | 61531443  | 2.25E-03       | 6.40E-07      | 40.72032288         | 3.07113E-08 |
| 12  | GeneID:51228     | <i>GLTP</i>         | 110288748 | 110318293 | rs73202468  | 110295897 | 2.38E-05       | 7.41E-05      | 40.31211218         | 3.73053E-08 |
| 6   | GeneID:11074     | <i>TRIM31</i>       | 30070674  | 30080867  | rs114071505 | 30060631  | 7.34E-03       | 2.80E-07      | 40.00716423         | 4.31368E-08 |
| 8   | GeneID:8658      | <i>TNKS</i>         | 9413445   | 9639856   | rs35169606  | 9604066   | 6.22E-03       | 3.31E-07      | 40.00253939         | 4.32319E-08 |
| 1   | GeneID:4914      | <i>NTRK1</i>        | 156785542 | 156851642 | rs2234883   | 156787110 | 3.47E-03       | 6.71E-07      | 39.75579135         | 4.86213E-08 |
| 1   | GeneID:5546      | <i>PRCC</i>         | 156737274 | 156770609 | rs2735657   | 156780306 | 6.02E-03       | 4.08E-07      | 39.6498692          | 5.11357E-08 |
| 6   | GeneID:10255     | <i>HCG9</i>         | 29942892  | 29946180  | rs116174003 | 29928557  | 1.71E-03       | 1.45E-06      | 39.63848411         | 5.14135E-08 |
| 6   | GeneID:352967    | <i>MICG</i>         | 29780167  | 29780469  | rs114181339 | 29784983  | 8.68E-04       | 3.22E-06      | 39.39220395         | 5.7807E-08  |
| 6   | GeneID:4279      | <i>MICD</i>         | 29938149  | 29943522  | rs116174003 | 29928557  | 1.83E-03       | 1.56E-06      | 39.34948954         | 5.89939E-08 |
| 6   | GeneID:80862     | <i>ZNRD1-AS1</i>    | 29968788  | 30028961  | rs141548494 | 29983301  | 8.58E-04       | 3.48E-06      | 39.25840593         | 6.16067E-08 |
| 16  | GeneID:146206    | <i>RLTPR</i>        | 67679030  | 67691472  | rs73597575  | 67677001  | 1.49E-02       | 2.06E-07      | 39.20925663         | 6.30642E-08 |
| 4   | GeneID:442777    | <i>LOC442777</i>    | 87870690  | 87871257  | rs2705616   | 87862396  | 1.66E-02       | 1.87E-07      | 39.17384128         | 6.41357E-08 |
| 16  | GeneID:6236      | <i>RRAD</i>         | 66955582  | 66959439  | rs3848284   | 66947383  | 1.03E-02       | 3.10E-07      | 39.11783844         | 6.58673E-08 |
| 6   | GeneID:2794      | <i>GNL1</i>         | 30509154  | 30525371  | rs116099574 | 30517414  | 3.52E-02       | 9.52E-08      | 39.02664944         | 6.87871E-08 |
| 1   | GeneID:2029      | <i>ENSA</i>         | 150594599 | 150602098 | rs138520356 | 150586501 | 5.90E-06       | 5.70E-04      | 39.02109893         | 6.89689E-08 |
| 22  | GeneID:5594      | <i>MAPK1</i>        | 22113946  | 22221970  | rs3859841   | 22232671  | 6.41E-07       | 5.68E-03      | 38.86159768         | 7.44041E-08 |
| 6   | GeneID:346171    | <i>ZFP57</i>        | 29640169  | 29644931  | rs138358844 | 29659400  | 7.55E-03       | 4.85E-07      | 38.84894993         | 7.48529E-08 |
| Chr | Gene.id          | Name                | Start     | End       | SNP.id      | SNP.pos   | pval(headache) | pval(hypoPAN) | X <sup>2</sup> ,4df | FCP         |

| 6   | GeneID:100126314 | <i>MIR877</i>       | 30552109  | 30552194  | rs151218088 | 30540762  | 1.45E-02       | 2.63E-07      | 38.77532851         | 7.75197E-08 |
|-----|------------------|---------------------|-----------|-----------|-------------|-----------|----------------|---------------|---------------------|-------------|
| 6   | GeneID:5758      | <i>PTMAP1</i>       | 30601227  | 30603024  | rs114148005 | 30587406  | 1.97E-02       | 1.93E-07      | 38.76847355         | 7.77727E-08 |
| 6   | GeneID:442191    | <i>OR14J1</i>       | 29274467  | 29275432  | rs150254595 | 29278406  | 6.51E-04       | 5.90E-06      | 38.75376263         | 7.83186E-08 |
| 2   | GeneID:3899      | <i>AFF3</i>         | 100163715 | 100759037 | rs4851239   | 100489966 | 3.39E-05       | 1.16E-04      | 38.71810589         | 7.96577E-08 |
| 1   | GeneID:84072     | <i>HORMAD1</i>      | 150670535 | 150693364 | rs17600020  | 150671887 | 4.08E-05       | 9.61E-05      | 38.71128665         | 7.99164E-08 |
| 1   | GeneID:11313     | <i>LYPLA2</i>       | 24117646  | 24122029  | rs12041159  | 24127660  | 1.61E-04       | 2.50E-05      | 38.66311844         | 8.17676E-08 |
| 6   | GeneID:28973     | <i>MRPS18B</i>      | 30585486  | 30594174  | rs114148005 | 30587406  | 2.07E-02       | 2.03E-07      | 38.57141195         | 8.54111E-08 |
| 6   | GeneID:353013    | <i>RPL7AP7</i>      | 29770910  | 29771797  | rs114181339 | 29784983  | 9.28E-04       | 4.69E-06      | 38.50664474         | 8.80815E-08 |
| 16  | GeneID:51647     | <i>FAM96B</i>       | 66965958  | 66968320  | rs185206552 | 66952572  | 1.75E-02       | 2.63E-07      | 38.39043538         | 9.30832E-08 |
| 1   | GeneID:2582      | <i>GALE</i>         | 24122089  | 24127294  | rs12041159  | 24127660  | 1.74E-04       | 2.67E-05      | 38.37897994         | 9.35914E-08 |
| 6   | GeneID:79969     | <i>ATAT1</i>        | 30594613  | 30614598  | rs114148005 | 30587406  | 2.24E-02       | 2.19E-07      | 38.26801667         | 9.86588E-08 |
| 6   | GeneID:352963    | <i>HLA-P</i>        | 29767821  | 29770856  | rs114181339 | 29784983  | 9.88E-04       | 4.99E-06      | 38.25601525         | 9.92231E-08 |
| 6   | GeneID:3135      | <i>HLA-G</i>        | 29794756  | 29798899  | rs114853934 | 29812896  | 7.26E-04       | 7.08E-06      | 38.17105887         | 1.0331E-07  |
| 6   | GeneID:353005    | <i>HCG4P8</i>       | 29793906  | 29794891  | rs114181339 | 29784983  | 8.33E-04       | 6.18E-06      | 38.16874312         | 1.03424E-07 |
| 12  | GeneID:23344     | <i>ESYT1</i>        | 56521986  | 56538460  | rs4759228   | 56508409  | 9.15E-04       | 5.64E-06      | 38.16423252         | 1.03646E-07 |
| 16  | GeneID:1014      | <i>CDH16</i>        | 66942025  | 66952887  | rs3848284   | 66947383  | 1.32E-02       | 3.95E-07      | 38.1486107          | 1.04418E-07 |
| 6   | GeneID:353000    | <i>HCGVIII-2</i>    | 29801426  | 29802705  | rs114853934 | 29812896  | 7.38E-04       | 7.12E-06      | 38.12926066         | 1.05382E-07 |
| 3   | GeneID:55254     | <i>TMEM39A</i>      | 119149701 | 119182471 | rs17203118  | 119152795 | 4.27E-02       | 1.25E-07      | 38.09263869         | 1.07232E-07 |
| 6   | GeneID:5514      | <i>PPP1R10</i>      | 30568182  | 30585020  | rs114148005 | 30587406  | 2.27E-02       | 2.52E-07      | 37.95964646         | 1.14224E-07 |
| 12  | GeneID:9815      | <i>GIT2</i>         | 110367607 | 110434194 | rs12312565  | 110449173 | 3.41E-05       | 1.70E-04      | 37.93398991         | 1.15625E-07 |
| 1   | GeneID:100509213 | <i>LOC100509213</i> | 24114238  | 24120044  | rs12041159  | 24127660  | 2.00E-04       | 2.90E-05      | 37.93009955         | 1.15839E-07 |
| 4   | GeneID:100616463 | <i>MIR4452</i>      | 87463635  | 87463705  | rs56164000  | 87458247  | 1.70E-03       | 3.50E-06      | 37.87811504         | 1.18734E-07 |
| 6   | GeneID:100189348 | <i>TRNAI21</i>      | 28505367  | 28505460  | rs115709379 | 28518299  | 7.76E-03       | 7.74E-07      | 37.86153401         | 1.19673E-07 |
| 6   | GeneID:352989    | <i>P5-11</i>        | 29795606  | 29795751  | rs114181339 | 29784983  | 9.10E-04       | 6.75E-06      | 37.81580177         | 1.22301E-07 |
| 6   | GeneID:100189034 | <i>TRNAR7</i>       | 28510891  | 28510963  | rs115709379 | 28518299  | 7.85E-03       | 7.83E-07      | 37.81552177         | 1.22317E-07 |
| 2   | GeneID:2744      | <i>GLS</i>          | 191745547 | 191829776 | rs148933924 | 191827528 | 1.30E-02       | 4.94E-07      | 37.72194961         | 1.27874E-07 |
| 16  | GeneID:10664     | <i>CTCF</i>         | 67596310  | 67673088  | rs73597575  | 67677001  | 2.65E-02       | 2.57E-07      | 37.60979205         | 1.34868E-07 |
| 4   | GeneID:100506746 | <i>LOC100506746</i> | 87846046  | 87856002  | rs2705620   | 87835616  | 5.77E-04       | 1.19E-05      | 37.5929706          | 1.3595E-07  |
| Chr | Gene.id          | Name                | Start     | End       | SNP.id      | SNP.pos   | pval(headache) | pval(hypoPAN) | X <sup>2</sup> ,4df | FCP         |

| 1   | GeneID:1513      | <i>CTSK</i>         | 150768684 | 150780917 | rs150253674 | 150788065 | 1.49E-05       | 4.67E-04      | 37.56119689         | 1.38016E-07 |
|-----|------------------|---------------------|-----------|-----------|-------------|-----------|----------------|---------------|---------------------|-------------|
| 6   | GeneID:100048907 | <i>ZDHHC20P1</i>    | 29675918  | 29676324  | rs183103224 | 29690291  | 2.97E-03       | 2.37E-06      | 37.54559414         | 1.39042E-07 |
| 12  | GeneID:59341     | <i>TRPV4</i>        | 110220892 | 110271212 | rs76219614  | 110272635 | 1.17E-04       | 6.02E-05      | 37.54512053         | 1.39073E-07 |
| 2   | GeneID:87178     | <i>PNPT1</i>        | 55861198  | 55921011  | rs62165233  | 55911454  | 2.85E-03       | 2.60E-06      | 37.43420214         | 1.46592E-07 |
| 8   | GeneID:100420404 | <i>LOC100420404</i> | 9311804   | 9314336   | rs7824444   | 9317065   | 1.06E-03       | 7.19E-06      | 37.38676285         | 1.4993E-07  |
| 16  | GeneID:23491     | <i>CES3</i>         | 66995132  | 67009052  | rs71649613  | 67006541  | 4.94E-02       | 1.58E-07      | 37.34260454         | 1.53105E-07 |
| 1   | GeneID:3155      | <i>HMGCL</i>        | 24128367  | 24151949  | rs12041159  | 24127660  | 2.38E-04       | 3.53E-05      | 37.1875494          | 1.64795E-07 |
| 16  | GeneID:124460    | <i>SNX20</i>        | 50700211  | 50715264  | rs35581802  | 50710646  | 2.35E-02       | 3.64E-07      | 37.15545122         | 1.67324E-07 |
| 6   | GeneID:80742     | <i>PRR3</i>         | 30524486  | 30532473  | rs151218088 | 30540762  | 1.53E-02       | 5.65E-07      | 37.1312748          | 1.69254E-07 |
| 1   | GeneID:57095     | <i>PITHD1</i>       | 24104876  | 24114722  | rs12041159  | 24127660  | 2.50E-04       | 3.64E-05      | 37.02818856         | 1.77738E-07 |
| 6   | GeneID:23        | <i>ABCF1</i>        | 30539170  | 30559309  | rs151218088 | 30540762  | 2.25E-02       | 4.08E-07      | 37.01497699         | 1.78855E-07 |
| 6   | GeneID:100189128 | <i>TRNAA18</i>      | 26687485  | 26687557  | rs9467835   | 26678512  | 7.11E-06       | 1.35E-03      | 36.93136116         | 1.86091E-07 |
| 2   | GeneID:100132762 | <i>LOC100132762</i> | 162424958 | 162426866 | rs140568161 | 162413257 | 1.69E-03       | 5.69E-06      | 36.92055928         | 1.87047E-07 |
| 6   | GeneID:353020    | <i>HCG4P11</i>      | 29688955  | 29689944  | rs183103224 | 29690291  | 3.60E-03       | 2.97E-06      | 36.70535939         | 2.07145E-07 |
| 6   | GeneID:6148      | <i>RPL23API</i>     | 29694409  | 29694931  | rs183103224 | 29690291  | 3.65E-03       | 3.01E-06      | 36.65561463         | 2.12088E-07 |
| 6   | GeneID:3134      | <i>HLA-F</i>        | 29691117  | 29695073  | rs183103224 | 29690291  | 3.65E-03       | 3.01E-06      | 36.6524545          | 2.12406E-07 |
| 22  | GeneID:100286925 | <i>LOC100286925</i> | 22292609  | 22297806  | rs5995257   | 22285987  | 8.76E-07       | 1.37E-02      | 36.47475946         | 2.31075E-07 |
| 17  | GeneID:23533     | <i>PIK3R5</i>       | 8782233   | 8869024   | rs61759573  | 8813578   | 3.49E-03       | 4.06E-06      | 36.14314858         | 2.70397E-07 |
| 2   | GeneID:9855      | <i>FARP2</i>        | 242295664 | 242434256 | rs886815    | 242396426 | 4.67E-02       | 3.84E-07      | 35.6755902          | 3.37423E-07 |
| 6   | GeneID:100189303 | <i>TRNAM16</i>      | 26701712  | 26701784  | rs2451729   | 26705859  | 5.23E-06       | 3.43E-03      | 35.6695956          | 3.38382E-07 |
| 1   | GeneID:55204     | <i>GOLPH3L</i>      | 150618701 | 150669672 | rs79726307  | 150622075 | 4.06E-05       | 4.44E-04      | 35.66143633         | 3.39691E-07 |
| 22  | GeneID:9647      | <i>PPM1F</i>        | 22273792  | 22307250  | rs5995257   | 22285987  | 1.49E-06       | 1.23E-02      | 35.62654756         | 3.45349E-07 |
| 1   | GeneID:3645      | <i>INSRR</i>        | 156810665 | 156828712 | rs6689750   | 156798725 | 5.67E-03       | 3.66E-06      | 35.37939643         | 3.88208E-07 |
| 12  | GeneID:100616454 | <i>MIR4497</i>      | 110271153 | 110271241 | rs76219614  | 110272635 | 6.01E-05       | 3.46E-04      | 35.37507929         | 3.89001E-07 |
| 8   | GeneID:94137     | <i>RP1L1</i>        | 10463859  | 10512617  | rs4395858   | 10521021  | 6.92E-04       | 3.37E-05      | 35.14797511         | 4.33131E-07 |
| 3   | GeneID:100506815 | <i>FOXP1-IT1</i>    | 71619425  | 71623608  | rs62244889  | 71609007  | 1.04E-05       | 2.35E-03      | 35.06022403         | 4.51489E-07 |
| 12  | GeneID:246329    | <i>STAC3</i>        | 57637242  | 57644969  | rs116973701 | 57629608  | 2.38E-06       | 1.06E-02      | 34.99236106         | 4.66216E-07 |
| 5   | GeneID:134505    | <i>LOC134505</i>    | 102368017 | 102368765 | rs30718     | 102354355 | 2.95E-03       | 9.20E-06      | 34.84419968         | 5.00054E-07 |
| Chr | Gene.id          | Name                | Start     | End       | SNP.id      | SNP.pos   | pval(headache) | pval(hypoPAN) | X <sup>2</sup> ,4df | FCP         |

| 9   | GeneID:3440      | <i>IFNA2</i>     | 21384254  | 21385396  | rs594544    | 21372123  | 2.76E-03       | 9.84E-06      | 34.8396974          | 5.0112E-07  |
|-----|------------------|------------------|-----------|-----------|-------------|-----------|----------------|---------------|---------------------|-------------|
| 12  | GeneID:6601      | <i>SMARCC2</i>   | 56555636  | 56583351  | rs150823486 | 56570811  | 1.55E-03       | 1.76E-05      | 34.83879583         | 5.01334E-07 |
| 4   | GeneID:5783      | <i>PTPN13</i>    | 87515468  | 87736329  | rs72665770  | 87513053  | 1.57E-03       | 1.87E-05      | 34.6962536          | 5.36285E-07 |
| 4   | GeneID:345274    | <i>SLC10A6</i>   | 87744621  | 87770416  | rs17751003  | 87771621  | 1.70E-02       | 1.73E-06      | 34.68963188         | 5.37967E-07 |
| 6   | GeneID:100189033 | <i>TRNA45</i>    | 28697092  | 28697163  | rs148076211 | 28708629  | 2.35E-03       | 1.26E-05      | 34.67245114         | 5.42354E-07 |
| 6   | GeneID:100189178 | <i>TRNAV18</i>   | 28703206  | 28703277  | rs148076211 | 28708629  | 2.36E-03       | 1.26E-05      | 34.66476633         | 5.44328E-07 |
| 6   | GeneID:442181    | <i>RPSAP2</i>    | 28699714  | 28700751  | rs148076211 | 28708629  | 2.36E-03       | 1.26E-05      | 34.65572912         | 5.46658E-07 |
| 1   | GeneID:405       | <i>ARNT</i>      | 150782181 | 150849244 | rs150253674 | 150788065 | 3.59E-05       | 8.44E-04      | 34.62353622         | 5.55041E-07 |
| 6   | GeneID:100189433 | <i>TRNAT21</i>   | 28693795  | 28693868  | rs148076211 | 28708629  | 2.50E-03       | 1.34E-05      | 34.42578773         | 6.09416E-07 |
| 6   | GeneID:100189472 | <i>TRNAF15P</i>  | 28694855  | 28694927  | rs148076211 | 28708629  | 2.50E-03       | 1.34E-05      | 34.42578773         | 6.09416E-07 |
| 16  | GeneID:442901    | <i>MIR328</i>    | 67236224  | 67236298  | rs55691975  | 67250992  | 3.01E-02       | 1.32E-06      | 34.07804148         | 7.18225E-07 |
| 2   | GeneID:645834    | <i>KRT8P15</i>   | 203704809 | 203706580 | rs72932780  | 203695826 | 8.01E-05       | 5.04E-04      | 34.05205884         | 7.27092E-07 |
| 6   | GeneID:100189411 | <i>TRNAA41</i>   | 26705606  | 26705678  | rs2451729   | 26705859  | 4.93E-06       | 8.18E-03      | 34.05006784         | 7.27776E-07 |
| 6   | GeneID:80352     | <i>RNF39</i>     | 30038043  | 30043628  | rs115985474 | 30055179  | 7.79E-03       | 5.21E-06      | 34.04119533         | 7.30832E-07 |
| 9   | GeneID:3461      | <i>IFNA11P</i>   | 21398613  | 21399138  | rs649053    | 21387418  | 4.45E-03       | 9.22E-06      | 34.02080153         | 7.37905E-07 |
| 6   | GeneID:100189092 | <i>TRNAA12</i>   | 28687481  | 28687552  | rs114950784 | 28696844  | 3.48E-03       | 1.24E-05      | 33.92485996         | 7.72103E-07 |
| 1   | GeneID:2517      | <i>FUCA1</i>     | 24171567  | 24194859  | rs61778163  | 24202985  | 4.44E-03       | 9.87E-06      | 33.88584395         | 7.86458E-07 |
| 18  | GeneID:220164    | <i>DOK6</i>      | 67068284  | 67516323  | rs34143434  | 67336322  | 3.17E-02       | 1.44E-06      | 33.80980745         | 8.15203E-07 |
| 12  | GeneID:6472      | <i>SHMT2</i>     | 57623356  | 57628718  | rs116973701 | 57629608  | 2.70E-06       | 1.74E-02      | 33.75048354         | 8.38354E-07 |
| 12  | GeneID:56901     | <i>NDUFA4L2</i>  | 57628686  | 57634545  | rs116973701 | 57629608  | 2.70E-06       | 1.74E-02      | 33.7491493          | 8.38882E-07 |
| 8   | GeneID:203074    | <i>PRSS55</i>    | 10383056  | 10411676  | rs4841381   | 10418221  | 3.32E-03       | 1.45E-05      | 33.69712781         | 8.59736E-07 |
| 16  | GeneID:79767     | <i>ELMO3</i>     | 67233028  | 67237927  | rs55691975  | 67250992  | 3.31E-02       | 1.46E-06      | 33.6948098          | 8.60677E-07 |
| 6   | GeneID:4340      | <i>MOG</i>       | 29624758  | 29640149  | rs62392957  | 29649219  | 1.02E-02       | 4.95E-06      | 33.60108185         | 8.99603E-07 |
| 9   | GeneID:3447      | <i>IFNA13</i>    | 21367371  | 21368075  | rs594544    | 21372123  | 3.41E-03       | 1.58E-05      | 33.4773289          | 9.53699E-07 |
| 16  | GeneID:653319    | <i>KIAA0895L</i> | 67209505  | 67217883  | rs77960079  | 67232523  | 3.85E-02       | 1.54E-06      | 33.28012469         | 1.04668E-06 |
| 8   | GeneID:606553    | <i>C8orf49</i>   | 11618765  | 11620309  | rs2409814   | 11606152  | 9.33E-03       | 6.36E-06      | 33.27919245         | 1.04714E-06 |
| 9   | GeneID:56262     | <i>LRRC8A</i>    | 131644391 | 131680318 | rs188368517 | 131638853 | 8.45E-03       | 7.06E-06      | 33.26823071         | 1.05257E-06 |
| 22  | GeneID:7008      | <i>TEF</i>       | 41763392  | 41795330  | rs11090046  | 41769083  | 4.59E-02       | 1.32E-06      | 33.24229813         | 1.06552E-06 |
| Chr | Gene.id          | Name             | Start     | End       | SNP.id      | SNP.pos   | pval(headache) | pval(hypoPAN) | X <sup>2</sup> ,4df | FCP         |



|    |                  |                     |           |           |             |           |          |          |             |             |
|----|------------------|---------------------|-----------|-----------|-------------|-----------|----------|----------|-------------|-------------|
| 1  | GeneID:6924      | <i>TCEB3</i>        | 24069856  | 24088549  | rs2076346   | 24083649  | 2.95E-03 | 2.09E-05 | 33.20324793 | 1.08532E-06 |
| 9  | GeneID:883       | <i>CCBL1</i>        | 131595392 | 131644354 | rs188368517 | 131638853 | 9.46E-03 | 6.70E-06 | 33.14693952 | 1.11453E-06 |
| 17 | GeneID:339168    | <i>TMEM95</i>       | 7258497   | 7260538   | rs3809831   | 7257669   | 4.70E-02 | 1.37E-06 | 33.11025323 | 1.13398E-06 |
| 5  | GeneID:5066      | <i>PAM</i>          | 102201527 | 102366809 | rs30718     | 102354355 | 8.94E-03 | 7.25E-06 | 33.10323096 | 1.13774E-06 |
| 16 | GeneID:1874      | <i>E2F4</i>         | 67226068  | 67232821  | rs77960079  | 67232523  | 4.03E-02 | 1.61E-06 | 33.102312   | 1.13823E-06 |
| 16 | GeneID:283849    | <i>EXOC3L1</i>      | 67218282  | 67224107  | rs77960079  | 67232523  | 4.09E-02 | 1.63E-06 | 33.04488747 | 1.16947E-06 |
| 11 | GeneID:441601    | <i>LOC441601</i>    | 50238999  | 50257633  | rs72907375  | 50256111  | 8.45E-06 | 7.97E-03 | 33.0269068  | 1.17942E-06 |
| 12 | GeneID:341333    | <i>LOC341333</i>    | 68429547  | 68430554  | rs117555625 | 68423869  | 1.47E-02 | 4.64E-06 | 33.00307319 | 1.19275E-06 |
| 8  | GeneID:100422982 | <i>MIR4286</i>      | 10524488  | 10524580  | rs4395858   | 10521021  | 1.88E-04 | 4.02E-04 | 32.79437637 | 1.31604E-06 |
| 8  | GeneID:728938    | <i>SUB1P1</i>       | 11647461  | 11648594  | rs2740444   | 11648789  | 3.69E-03 | 2.05E-05 | 32.7940873  | 1.31622E-06 |
| 2  | GeneID:55759     | <i>WDR12</i>        | 203745323 | 203776949 | rs35212307  | 203765756 | 6.01E-05 | 1.29E-03 | 32.74902333 | 1.34447E-06 |
| 11 | GeneID:4607      | <i>MYBPC3</i>       | 47352957  | 47374253  | rs79187134  | 47346465  | 1.45E-03 | 5.78E-05 | 32.59126313 | 1.44822E-06 |
| 12 | GeneID:4637      | <i>MYL6</i>         | 56552045  | 56555366  | rs7960225   | 56564811  | 1.24E-02 | 6.90E-06 | 32.5546313  | 1.47342E-06 |
| 8  | GeneID:5747      | <i>PTK2</i>         | 141668481 | 142011412 | rs4961285   | 141700074 | 3.99E-02 | 2.22E-06 | 32.48138194 | 1.52515E-06 |
| 3  | GeneID:27086     | <i>FOXP1</i>        | 71004736  | 71633140  | rs7610856   | 71579022  | 5.40E-06 | 1.80E-02 | 32.29490371 | 1.66514E-06 |
| 16 | GeneID:1506      | <i>CTRL</i>         | 67963473  | 67965778  | rs148240639 | 67954932  | 4.86E-02 | 2.08E-06 | 32.21601692 | 1.72815E-06 |
| 16 | GeneID:80262     | <i>C16orf70</i>     | 67143915  | 67182442  | rs191091369 | 67139616  | 3.20E-02 | 3.22E-06 | 32.18003584 | 1.75767E-06 |
| 1  | GeneID:100270904 | <i>RPS3AP11</i>     | 42957386  | 42958184  | rs11805616  | 42966550  | 1.82E-05 | 5.68E-03 | 32.16596988 | 1.76934E-06 |
| 4  | GeneID:133308    | <i>SLC9B2</i>       | 103946652 | 103998170 | rs7688014   | 103975060 | 4.98E-06 | 2.15E-02 | 32.10210523 | 1.82334E-06 |
| 6  | GeneID:6992      | <i>PPP1R11</i>      | 30034932  | 30038110  | rs189720814 | 30049788  | 4.50E-02 | 2.39E-06 | 32.09528133 | 1.82921E-06 |
| 6  | GeneID:26529     | <i>OR12D2</i>       | 29364416  | 29365448  | rs3128852   | 29364135  | 4.93E-04 | 2.22E-04 | 32.05055816 | 1.86812E-06 |
| 6  | GeneID:729177    | <i>LOC729177</i>    | 22134831  | 22147422  | rs9295536   | 22131929  | 2.69E-05 | 4.09E-03 | 32.0466838  | 1.87153E-06 |
| 6  | GeneID:100131607 | <i>LOC100131607</i> | 34664094  | 34665247  | rs2814949   | 34656722  | 3.89E-02 | 2.86E-06 | 32.02075259 | 1.89451E-06 |
| 4  | GeneID:100128183 | <i>PABPC1P7</i>     | 103817886 | 103819829 | rs10012413  | 103817531 | 4.99E-05 | 2.35E-03 | 31.91521505 | 1.99097E-06 |
| 16 | GeneID:65057     | <i>ACD</i>          | 67691415  | 67694718  | rs73597575  | 67677001  | 1.31E-02 | 9.09E-06 | 31.88112372 | 2.02316E-06 |
| 12 | GeneID:140465    | <i>MYL6B</i>        | 56546204  | 56551771  | rs7960225   | 56564811  | 1.48E-02 | 8.25E-06 | 31.83912488 | 2.06353E-06 |

Chr, chromosome number; Gene.id, Gene ID; Name, Gene; Start, start point of the gene; End, end point of the gene; SNP.id, top SNP associated with the gene; SNP.pos, position of the top SNP; pval(headache), p-value of the gene in headache dataset; pval(hypoPAN), p-value of the gene in hypothyroidism dataset

**Supplementary Table S11.** Genes overlapping headache and hyperthyroidism at  $p < 0.05$  and Fisher combined p-value ( $p_{\text{FCP}} < 2.09 \times 10^{-6}$ ).

| Chr | Gene.id          | Name                | Start    | End      | SNP.id      | SNP.pos  | pval(headache) | pval(hyperPAN) | X <sup>2</sup> ,4df | FCP         |
|-----|------------------|---------------------|----------|----------|-------------|----------|----------------|----------------|---------------------|-------------|
| 6   | GeneID:3117      | <i>HLA-DQA1</i>     | 32605183 | 32611429 | rs9272729   | 32609594 | 4.50E-05       | 2.12E-103      | 492.8471481         | 2.3607E-105 |
| 6   | GeneID:3119      | <i>HLA-DQB1</i>     | 32627657 | 32634466 | rs1130389   | 32632627 | 1.09E-05       | 1.16E-102      | 492.2771185         | 3.1356E-105 |
| 6   | GeneID:100131609 | <i>HNRNPA1P2</i>    | 32293175 | 32294298 | rs116667074 | 32285362 | 7.28E-06       | 3.36E-100      | 481.7524418         | 5.9208E-103 |
| 6   | GeneID:10665     | <i>C6orf10</i>      | 32260475 | 32339656 | rs116667074 | 32285362 | 1.46E-05       | 6.76E-100      | 478.9579529         | 2.3806E-102 |
| 6   | GeneID:3127      | <i>HLA-DRB5</i>     | 32485151 | 32498006 | rs115250958 | 32509842 | 3.77E-05       | 1.74E-99       | 475.1804575         | 1.5614E-101 |
| 6   | GeneID:3128      | <i>HLA-DRB6</i>     | 32520490 | 32527779 | rs115250958 | 32509842 | 3.81E-05       | 1.76E-99       | 475.1275133         | 1.6032E-101 |
| 6   | GeneID:721       | <i>C4B</i>          | 31982572 | 32003195 | rs433061    | 32014828 | 1.16E-07       | 2.26E-92       | 453.9823452         | 5.9828E-97  |
| 6   | GeneID:100302242 | <i>MIR1236</i>      | 31924616 | 31924717 | rs1270942   | 31918860 | 1.43E-07       | 2.35E-92       | 453.4845579         | 7.66519E-97 |
| 6   | GeneID:7936      | <i>RDBP</i>         | 31919864 | 31926864 | rs1270942   | 31918860 | 1.48E-07       | 2.44E-92       | 453.3431535         | 8.2242E-97  |
| 6   | GeneID:6499      | <i>SKIV2L</i>       | 31926581 | 31937532 | rs1270942   | 31918860 | 1.75E-07       | 2.88E-92       | 452.6725223         | 1.14836E-96 |
| 6   | GeneID:629       | <i>CFB</i>          | 31913721 | 31919861 | rs1270942   | 31918860 | 1.76E-07       | 2.90E-92       | 452.649674          | 1.1615E-96  |
| 6   | GeneID:1589      | <i>CYP21A2</i>      | 32006093 | 32009447 | rs433061    | 32014828 | 1.77E-07       | 3.46E-92       | 452.287627          | 1.39088E-96 |
| 6   | GeneID:7148      | <i>TNXB</i>         | 32008932 | 32077151 | rs1269852   | 32080191 | 3.04E-07       | 3.88E-92       | 450.9781215         | 2.66927E-96 |
| 6   | GeneID:717       | <i>C2</i>           | 31868776 | 31913449 | rs1270942   | 31918860 | 2.79E-07       | 4.59E-92       | 450.8075242         | 2.90585E-96 |
| 6   | GeneID:1388      | <i>ATF6B</i>        | 32083045 | 32096017 | rs1269852   | 32080191 | 1.64E-07       | 1.98E-91       | 448.9452753         | 7.34287E-96 |
| 6   | GeneID:4758      | <i>NEU1</i>         | 31826829 | 31830709 | rs501942    | 31840477 | 5.11E-07       | 4.58E-89       | 435.7903894         | 5.12337E-93 |
| 6   | GeneID:80736     | <i>SLC44A4</i>      | 31830969 | 31846823 | rs501942    | 31840477 | 4.53E-07       | 6.18E-89       | 435.429764          | 6.13065E-93 |
| 6   | GeneID:10919     | <i>EHMT2</i>        | 31847536 | 31865464 | rs501942    | 31840477 | 4.78E-07       | 6.52E-89       | 435.2195593         | 6.8068E-93  |
| 6   | GeneID:80740     | <i>LY6G6C</i>       | 31686425 | 31689510 | rs3131383   | 31704294 | 1.48E-07       | 6.60E-88       | 432.9394231         | 2.11737E-92 |
| 6   | GeneID:80739     | <i>C6orf25</i>      | 31691121 | 31694487 | rs3101018   | 31705864 | 1.77E-07       | 1.02E-87       | 431.714517          | 3.89545E-92 |
| 6   | GeneID:23564     | <i>DDAH2</i>        | 31694817 | 31698039 | rs3132445   | 31712196 | 2.03E-07       | 1.17E-87       | 431.1510321         | 5.15647E-92 |
| 6   | GeneID:1192      | <i>CLIC1</i>        | 31698358 | 31704341 | rs3130484   | 31715882 | 2.25E-07       | 1.44E-87       | 430.5394497         | 6.99105E-92 |
| 6   | GeneID:401251    | <i>C6orf26</i>      | 31730773 | 31732627 | rs3130484   | 31715882 | 2.01E-07       | 2.15E-87       | 429.9588817         | 9.33313E-92 |
| 6   | GeneID:80737     | <i>C6orf27</i>      | 31733371 | 31745108 | rs3117573   | 31718396 | 2.15E-07       | 2.17E-87       | 429.808335          | 1.00593E-91 |
| 6   | GeneID:100532732 | <i>MSH5-C6orf26</i> | 31707725 | 31732627 | rs3130484   | 31715882 | 3.09E-07       | 1.98E-87       | 429.2596351         | 1.32179E-91 |
| Chr | Gene.id          | Name                | Start    | End      | SNP.id      | SNP.pos  | pval(headache) | pval(hyperPAN) | X <sup>2</sup> ,4df | FCP         |

| 6   | GeneID:5491      | <i>PPIAP9</i>          | 31486754 | 31488108 | rs3130614   | 31476458 | 2.59E-07       | 6.94E-80       | 394.8727358         | 3.5653E-84  |
|-----|------------------|------------------------|----------|----------|-------------|----------|----------------|----------------|---------------------|-------------|
| 6   | GeneID:4277      | <i>MICB</i>            | 31465855 | 31478901 | rs3130614   | 31476458 | 4.11E-07       | 1.10E-79       | 393.0203999         | 8.95971E-84 |
| 6   | GeneID:4049      | <i>LTA</i>             | 31539876 | 31542098 | rs1800628   | 31546850 | 1.76E-07       | 3.22E-79       | 392.5761084         | 1.11759E-83 |
| 6   | GeneID:259197    | <i>NCR3</i>            | 31556660 | 31560762 | rs1800628   | 31546850 | 1.79E-07       | 3.29E-79       | 392.4994788         | 1.16101E-83 |
| 6   | GeneID:7124      | <i>TNF</i>             | 31543350 | 31546112 | rs1800628   | 31546850 | 1.86E-07       | 3.40E-79       | 392.3582939         | 1.24549E-83 |
| 6   | GeneID:7940      | <i>LST1</i>            | 31553956 | 31556686 | rs1800628   | 31546850 | 1.90E-07       | 3.49E-79       | 392.2631839         | 1.30583E-83 |
| 6   | GeneID:4050      | <i>LTB</i>             | 31548335 | 31550202 | rs1800628   | 31546850 | 1.92E-07       | 3.51E-79       | 392.2306421         | 1.32715E-83 |
| 6   | GeneID:100287329 | <i>LOC100287329</i>    | 31527348 | 31540474 | rs1800628   | 31546850 | 2.48E-07       | 4.54E-79       | 391.2025318         | 2.21328E-83 |
| 6   | GeneID:692233    | <i>SNORD117</i>        | 31504151 | 31504226 | rs9267488   | 31514247 | 6.99E-07       | 4.67E-78       | 384.4690171         | 6.30519E-82 |
| 6   | GeneID:692199    | <i>SNORD84</i>         | 31508878 | 31508955 | rs9267488   | 31514247 | 8.34E-07       | 5.57E-78       | 383.7621677         | 8.96177E-82 |
| 6   | GeneID:534       | <i>ATP6V1G2</i>        | 31512228 | 31514625 | rs9267488   | 31514247 | 8.95E-07       | 5.98E-78       | 383.4793061         | 1.03157E-81 |
| 6   | GeneID:100532737 | <i>ATP6V1G2-DDX39B</i> | 31497996 | 31514625 | rs9267488   | 31514247 | 1.00E-06       | 6.68E-78       | 383.0320507         | 1.28859E-81 |
| 6   | GeneID:4795      | <i>NFKBIL1</i>         | 31514628 | 31526606 | rs9267488   | 31514247 | 1.10E-06       | 7.34E-78       | 382.6604054         | 1.55023E-81 |
| 6   | GeneID:3106      | <i>HLA-B</i>           | 31321649 | 31324989 | rs2523593   | 31326703 | 1.14E-06       | 2.20E-74       | 366.5735009         | 4.62455E-78 |
| 6   | GeneID:729816    | <i>DHFRP2</i>          | 31331244 | 31334742 | rs2523593   | 31326703 | 1.22E-06       | 2.34E-74       | 366.320963          | 5.24336E-78 |
| 6   | GeneID:100507444 | <i>PPP1R2P1</i>        | 32844255 | 32847851 | rs115591082 | 32844103 | 5.24E-06       | 7.06E-74       | 361.1907275         | 6.72256E-77 |
| 6   | GeneID:5698      | <i>PSMB9</i>           | 32821938 | 32827628 | rs45506201  | 32808299 | 5.28E-06       | 1.06E-73       | 360.3571513         | 1.01753E-76 |
| 6   | GeneID:6890      | <i>TAP1</i>            | 32812986 | 32821748 | rs45506201  | 32808299 | 9.10E-06       | 1.83E-73       | 358.177551          | 3.0076E-76  |
| 6   | GeneID:100507463 | <i>LOC100507463</i>    | 32811863 | 32814277 | rs45506201  | 32808299 | 9.66E-06       | 1.95E-73       | 357.9399602         | 3.38474E-76 |
| 6   | GeneID:5696      | <i>PSMB8</i>           | 32808494 | 32812712 | rs45506201  | 32808299 | 1.03E-05       | 2.09E-73       | 357.6643812         | 3.88181E-76 |
| 6   | GeneID:6891      | <i>TAP2</i>            | 32789610 | 32806547 | rs45506201  | 32808299 | 1.35E-05       | 2.72E-73       | 356.595641          | 6.60413E-76 |
| 6   | GeneID:29113     | <i>C6orf15</i>         | 31079000 | 31080332 | rs2233980   | 31079644 | 9.56E-07       | 1.04E-65       | 326.9783188         | 1.63568E-69 |
| 6   | GeneID:1041      | <i>CDSN</i>            | 31082865 | 31088252 | rs2233980   | 31079644 | 1.09E-06       | 1.19E-65       | 326.4386051         | 2.13886E-69 |
| 6   | GeneID:170679    | <i>PSORS1C1</i>        | 31082608 | 31107869 | rs2233980   | 31079644 | 1.44E-06       | 1.56E-65       | 325.3446746         | 3.68364E-69 |
| 6   | GeneID:170680    | <i>PSORS1C2</i>        | 31105311 | 31107127 | rs3130557   | 31094703 | 2.78E-06       | 1.02E-65       | 324.8818322         | 4.63625E-69 |
| 6   | GeneID:54535     | <i>CCHCR1</i>          | 31110216 | 31126015 | rs3132541   | 31098734 | 4.22E-06       | 1.09E-65       | 323.9139866         | 7.49971E-69 |
| 6   | GeneID:3108      | <i>HLA-DMA</i>         | 32916391 | 32920899 | rs73396802  | 32915797 | 1.41E-03       | 1.27E-57       | 275.1501612         | 2.47507E-58 |
| 6   | GeneID:6046      | <i>BRD2</i>            | 32936437 | 32949282 | rs57651384  | 32923849 | 1.52E-03       | 1.31E-57       | 274.9329354         | 2.75687E-58 |
| Chr | Gene.id          | Name                   | Start    | End      | SNP.id      | SNP.pos  | pval(headache) | pval(hyperPAN) | X <sup>2</sup> ,4df | FCP         |

| 6   | GeneID:3109      | <i>HLA-DMB</i>  | 32902406 | 32908847 | rs73396802  | 32915797 | 1.55E-03       | 2.22E-57       | 273.8410297         | 4.74029E-58 |
|-----|------------------|-----------------|----------|----------|-------------|----------|----------------|----------------|---------------------|-------------|
| 6   | GeneID:720       | <i>C4A</i>      | 31949834 | 31970457 | rs6941112   | 31946614 | 2.32E-04       | 1.22E-50       | 246.5989953         | 3.51704E-52 |
| 6   | GeneID:1797      | <i>DOM3Z</i>    | 31937588 | 31940032 | rs6941112   | 31946614 | 2.56E-04       | 1.34E-50       | 246.2035578         | 4.27912E-52 |
| 6   | GeneID:8859      | <i>STK19</i>    | 31938952 | 31949223 | rs6941112   | 31946614 | 2.56E-04       | 1.34E-50       | 246.2035578         | 4.27912E-52 |
| 6   | GeneID:3112      | <i>HLA-DOB</i>  | 32780540 | 32784825 | rs241437    | 32797684 | 4.26E-03       | 1.12E-47       | 227.1240215         | 5.49144E-48 |
| 6   | GeneID:100129192 | <i>MICC</i>     | 30382490 | 30387543 | rs149543464 | 30400763 | 2.63E-07       | 8.55E-43       | 224.0300348         | 2.54467E-47 |
| 6   | GeneID:3879      | <i>KRT18P1</i>  | 28936847 | 28938244 | rs148696809 | 28934352 | 5.80E-09       | 5.15E-32       | 182.0172361         | 2.74972E-38 |
| 6   | GeneID:100189111 | <i>TRNAM8</i>   | 28921042 | 28921114 | rs148696809 | 28934352 | 7.63E-09       | 6.77E-32       | 180.924014          | 4.72161E-38 |
| 6   | GeneID:26695     | <i>OR2U1P</i>   | 29230436 | 29231856 | rs144447022 | 29244219 | 6.18E-09       | 2.29E-31       | 178.9081197         | 1.27945E-37 |
| 6   | GeneID:26694     | <i>OR2U2P</i>   | 29236242 | 29237198 | rs144447022 | 29244219 | 7.17E-09       | 2.66E-31       | 178.3095379         | 1.72014E-37 |
| 6   | GeneID:442190    | <i>OR2B4P</i>   | 29258373 | 29259527 | rs144447022 | 29244219 | 9.80E-09       | 3.63E-31       | 177.0609619         | 3.18913E-37 |
| 6   | GeneID:100189035 | <i>TRNAT5</i>   | 28456770 | 28456843 | rs34676049  | 28453618 | 2.70E-08       | 6.43E-29       | 164.6823526         | 1.44724E-34 |
| 6   | GeneID:7211      | <i>TRMEP1</i>   | 28448503 | 28448575 | rs34676049  | 28453618 | 2.74E-08       | 6.54E-29       | 164.6190632         | 1.4932E-34  |
| 6   | GeneID:100189344 | <i>TRNAT16</i>  | 28442329 | 28442402 | rs34676049  | 28453618 | 2.76E-08       | 6.59E-29       | 164.5876642         | 1.51655E-34 |
| 6   | GeneID:7209      | <i>TRNAL47P</i> | 28446350 | 28446431 | rs34676049  | 28453618 | 2.85E-08       | 6.80E-29       | 164.462346          | 1.6134E-34  |
| 6   | GeneID:100189118 | <i>TRNAL12</i>  | 28446400 | 28446481 | rs34676049  | 28453618 | 2.85E-08       | 6.80E-29       | 164.462346          | 1.6134E-34  |
| 6   | GeneID:222698    | <i>NKAPL</i>    | 28227098 | 28228736 | rs17720293  | 28214698 | 1.85E-08       | 4.39E-28       | 161.6028597         | 6.62439E-34 |
| 6   | GeneID:3304      | <i>HSPA1B</i>   | 31795512 | 31798031 | rs1043618   | 31783507 | 6.14E-04       | 3.14E-32       | 159.8703493         | 1.55859E-33 |
| 6   | GeneID:84547     | <i>PGBD1</i>    | 28249314 | 28270326 | rs33932084  | 28268824 | 4.40E-08       | 5.59E-28       | 159.3789637         | 1.98662E-33 |
| 6   | GeneID:7741      | <i>ZNF187</i>   | 28234788 | 28245981 | rs13208096  | 28225311 | 6.43E-08       | 3.91E-28       | 159.3408229         | 2.02439E-33 |
| 6   | GeneID:3305      | <i>HSPA1L</i>   | 31777396 | 31782835 | rs1043618   | 31783507 | 7.84E-04       | 4.01E-32       | 158.8917802         | 2.52692E-33 |
| 6   | GeneID:3303      | <i>HSPA1A</i>   | 31783291 | 31785719 | rs1043618   | 31783507 | 8.06E-04       | 4.12E-32       | 158.7801093         | 2.67017E-33 |
| 6   | GeneID:64288     | <i>ZNF323</i>   | 28292514 | 28324048 | rs13214023  | 28332141 | 5.49E-08       | 7.61E-28       | 158.3204635         | 3.35048E-33 |
| 6   | GeneID:57819     | <i>LSM2</i>     | 31765173 | 31774743 | rs1043618   | 31783507 | 9.25E-04       | 4.73E-32       | 158.2279906         | 3.50701E-33 |
| 6   | GeneID:7746      | <i>ZNF193</i>   | 28193029 | 28201265 | rs17720293  | 28214698 | 2.28E-08       | 1.95E-27       | 158.1948607         | 3.56485E-33 |
| 6   | GeneID:387032    | <i>ZKSCAN4</i>  | 28212490 | 28220002 | rs17720293  | 28214698 | 2.24E-08       | 1.99E-27       | 158.1849703         | 3.5823E-33  |
| 6   | GeneID:26719     | <i>OR2E1P</i>   | 28423307 | 28423934 | rs67381177  | 28411941 | 3.44E-08       | 1.31E-27       | 158.1720726         | 3.60519E-33 |
| 6   | GeneID:100189159 | <i>TRNAS13</i>  | 28180815 | 28180896 | rs13197633  | 28174757 | 3.37E-08       | 1.69E-27       | 157.7041654         | 4.54215E-33 |
| Chr | Gene.id          | Name            | Start    | End      | SNP.id      | SNP.pos  | pval(headache) | pval(hyperPAN) | X <sup>2</sup> ,4df | FCP         |

| 6   | GeneID:222699    | <i>TOB2P1</i>       | 28183116 | 28186707 | rs13197633  | 28174757 | 3.70E-08       | 1.85E-27       | 157.3319748         | 5.45844E-33 |
|-----|------------------|---------------------|----------|----------|-------------|----------|----------------|----------------|---------------------|-------------|
| 6   | GeneID:9753      | <i>ZSCAN12</i>      | 28346598 | 28367544 | rs35883476  | 28368508 | 3.71E-08       | 2.28E-27       | 156.9088988         | 6.72642E-33 |
| 6   | GeneID:100419756 | <i>LOC100419756</i> | 28376002 | 28377027 | rs35883476  | 28368508 | 3.09E-08       | 2.76E-27       | 156.8922258         | 6.78201E-33 |
| 6   | GeneID:140468    | <i>COX11P1</i>      | 28414697 | 28415407 | rs67381177  | 28411941 | 3.40E-08       | 2.79E-27       | 156.6814076         | 7.52594E-33 |
| 6   | GeneID:222696    | <i>ZSCAN23</i>      | 28400432 | 28411279 | rs13201681  | 28394680 | 3.46E-08       | 3.16E-27       | 156.3975991         | 8.65788E-33 |
| 6   | GeneID:80317     | <i>ZKSCAN3</i>      | 28317691 | 28336954 | rs13214023  | 28332141 | 5.02E-08       | 2.68E-27       | 155.9845713         | 1.06161E-32 |
| 6   | GeneID:222701    | <i>ZNF192P2</i>     | 28155716 | 28157189 | rs13195291  | 28169241 | 3.64E-08       | 1.34E-25       | 148.7992996         | 3.68139E-31 |
| 6   | GeneID:651302    | <i>ZNF192P1</i>     | 28129551 | 28137376 | rs35749575  | 28114818 | 3.58E-08       | 1.39E-25       | 148.765986          | 3.7424E-31  |
| 6   | GeneID:100419608 | <i>LOC100419608</i> | 28083427 | 28083998 | rs66886492  | 28089731 | 2.61E-08       | 1.93E-25       | 148.7384049         | 3.79367E-31 |
| 6   | GeneID:100189315 | <i>TRNAM17</i>      | 27870271 | 27870342 | rs13218875  | 27884012 | 3.31E-08       | 1.62E-25       | 148.6137362         | 4.03433E-31 |
| 6   | GeneID:100189314 | <i>TRNAG29</i>      | 27870686 | 27870756 | rs13218875  | 27884012 | 3.41E-08       | 1.67E-25       | 148.4967279         | 4.27408E-31 |
| 6   | GeneID:26212     | <i>OR2B6</i>        | 27925019 | 27925960 | rs149583087 | 27912437 | 1.69E-08       | 3.49E-25       | 148.4234477         | 4.43142E-31 |
| 6   | GeneID:81697     | <i>OR2B2</i>        | 27878963 | 27880174 | rs13218875  | 27884012 | 3.53E-08       | 1.73E-25       | 148.3592279         | 4.57407E-31 |
| 6   | GeneID:7745      | <i>ZNF192</i>       | 28109716 | 28125236 | rs35749575  | 28114818 | 3.81E-08       | 1.71E-25       | 148.2262665         | 4.88417E-31 |
| 6   | GeneID:100147813 | <i>RNU7-26P</i>     | 27865284 | 27865343 | rs61742093  | 27879982 | 4.37E-08       | 1.50E-25       | 148.2035874         | 4.93913E-31 |
| 6   | GeneID:81694     | <i>OR2W2P</i>       | 28001693 | 28002640 | rs13193295  | 28003228 | 2.65E-08       | 2.85E-25       | 147.9207943         | 5.67858E-31 |
| 6   | GeneID:81406     | <i>OR2W6P</i>       | 27905182 | 27906179 | rs149583087 | 27912437 | 1.95E-08       | 4.02E-25       | 147.8519873         | 5.87464E-31 |
| 6   | GeneID:80345     | <i>ZSCAN16</i>      | 28092387 | 28097857 | rs66886492  | 28089731 | 3.25E-08       | 2.57E-25       | 147.7239854         | 6.25757E-31 |
| 6   | GeneID:442175    | <i>RPLP2P1</i>      | 27932953 | 27933234 | rs28360499  | 27945396 | 2.22E-08       | 4.36E-25       | 147.427854          | 7.24186E-31 |
| 6   | GeneID:340192    | <i>IQCB2P</i>       | 27978329 | 27980680 | rs71559067  | 27994416 | 3.19E-08       | 3.41E-25       | 147.1952496         | 8.12237E-31 |
| 6   | GeneID:221584    | <i>ZSCAN12P1</i>    | 28058929 | 28063493 | rs35952432  | 28074901 | 4.07E-08       | 2.89E-25       | 147.0412489         | 8.76345E-31 |
| 6   | GeneID:81695     | <i>OR2B7P</i>       | 28014213 | 28015147 | rs13193295  | 28003228 | 2.81E-08       | 4.25E-25       | 147.007402          | 8.91099E-31 |
| 6   | GeneID:100129195 | <i>LOC100129195</i> | 28058336 | 28105071 | rs35749575  | 28114818 | 4.09E-08       | 3.00E-25       | 146.9547775         | 9.14534E-31 |
| 6   | GeneID:81407     | <i>OR2W4P</i>       | 27944929 | 27945851 | rs28360499  | 27945396 | 2.52E-08       | 4.95E-25       | 146.9211175         | 9.29846E-31 |
| 6   | GeneID:65944     | <i>OR2B8P</i>       | 28020906 | 28022043 | rs13200214  | 28017250 | 3.71E-08       | 4.98E-25       | 146.1412625         | 1.36607E-30 |
| 6   | GeneID:442179    | <i>OR1F12</i>       | 28041026 | 28042002 | rs71559070  | 28038929 | 5.63E-08       | 3.84E-25       | 145.8234729         | 1.5979E-30  |
| 6   | GeneID:8348      | <i>HIST1H2BO</i>    | 27861203 | 27861669 | rs13199649  | 27868792 | 4.66E-08       | 4.99E-25       | 145.6770201         | 1.71759E-30 |
| 6   | GeneID:8336      | <i>HIST1H2AM</i>    | 27860477 | 27860963 | rs13199649  | 27868792 | 4.67E-08       | 4.99E-25       | 145.6724928         | 1.72143E-30 |
| Chr | Gene.id          | Name                | Start    | End      | SNP.id      | SNP.pos  | pval(headache) | pval(hyperPAN) | X <sup>2</sup> ,4df | FCP         |

| 6   | GeneID:100507241 | <i>LOC100507241</i> | 28046570 | 28048908 | rs35902873 | 28058949 | 6.06E-08       | 4.20E-25       | 145.4985104         | 1.87567E-30 |
|-----|------------------|---------------------|----------|----------|------------|----------|----------------|----------------|---------------------|-------------|
| 6   | GeneID:8356      | <i>HIST1H3J</i>     | 27858093 | 27858570 | rs13199649 | 27868792 | 4.98E-08       | 5.33E-25       | 145.410396          | 1.95899E-30 |
| 6   | GeneID:7718      | <i>ZNF165</i>       | 28048482 | 28057341 | rs34166054 | 28065801 | 6.34E-08       | 4.39E-25       | 145.3181574         | 2.05017E-30 |
| 6   | GeneID:100189131 | <i>TRNAI6</i>       | 27599200 | 27599293 | rs35715914 | 27592003 | 2.50E-08       | 2.82E-24       | 143.4570362         | 5.1334E-30  |
| 6   | GeneID:100189300 | <i>TRNAT13</i>      | 27586135 | 27586208 | rs35715914 | 27592003 | 2.53E-08       | 2.85E-24       | 143.4171827         | 5.23528E-30 |
| 6   | GeneID:10340     | <i>HIST1H2BPS2</i>  | 27831840 | 27832179 | rs45509595 | 27840926 | 8.08E-08       | 1.08E-24       | 143.0375362         | 6.31312E-30 |
| 6   | GeneID:8332      | <i>HIST1H2AL</i>    | 27833107 | 27833576 | rs45509595 | 27840926 | 8.22E-08       | 1.10E-24       | 142.9712725         | 6.52281E-30 |
| 6   | GeneID:3009      | <i>HIST1H1B</i>     | 27834570 | 27835359 | rs45509595 | 27840926 | 8.37E-08       | 1.11E-24       | 142.9002058         | 6.75544E-30 |
| 6   | GeneID:8368      | <i>HIST1H4L</i>     | 27840926 | 27841289 | rs45509595 | 27840926 | 8.63E-08       | 1.15E-24       | 142.7775351         | 7.17668E-30 |
| 6   | GeneID:8354      | <i>HIST1H3I</i>     | 27839623 | 27840099 | rs45509595 | 27840926 | 8.90E-08       | 1.19E-24       | 142.6530588         | 7.63097E-30 |
| 6   | GeneID:100189205 | <i>TRNASI5</i>      | 27640229 | 27640310 | rs13217620 | 27653120 | 3.55E-08       | 3.67E-24       | 142.232912          | 9.3875E-30  |
| 6   | GeneID:100189161 | <i>TRNAV17</i>      | 27648885 | 27648957 | rs13217620 | 27653120 | 3.64E-08       | 3.77E-24       | 142.1256677         | 9.89725E-30 |
| 6   | GeneID:100189428 | <i>TRNAR29</i>      | 27638344 | 27638416 | rs13217620 | 27653120 | 3.82E-08       | 3.96E-24       | 141.932075          | 1.08885E-29 |
| 6   | GeneID:100189340 | <i>TRNAT15</i>      | 27652474 | 27652547 | rs13217620 | 27653120 | 4.05E-08       | 4.19E-24       | 141.7026757         | 1.21924E-29 |
| 6   | GeneID:100189071 | <i>TRNAI4</i>       | 27655967 | 27656040 | rs13217620 | 27653120 | 4.15E-08       | 4.29E-24       | 141.6092069         | 1.27674E-29 |
| 6   | GeneID:7738      | <i>ZNF184</i>       | 27418521 | 27440897 | rs35716472 | 27406607 | 9.90E-09       | 2.19E-23       | 141.2095389         | 1.55482E-29 |
| 6   | GeneID:100189352 | <i>TRNAS24</i>      | 27509554 | 27509635 | rs35848276 | 27521096 | 3.03E-08       | 8.16E-24       | 140.9498883         | 1.76715E-29 |
| 6   | GeneID:94017     | <i>TRNAS1</i>       | 27513468 | 27513549 | rs35848276 | 27521096 | 3.07E-08       | 8.25E-24       | 140.9039049         | 1.80767E-29 |
| 6   | GeneID:100189268 | <i>TRNAQ21</i>      | 27515531 | 27515602 | rs35848276 | 27521096 | 3.08E-08       | 8.28E-24       | 140.8897772         | 1.82031E-29 |
| 6   | GeneID:100189070 | <i>TRNAS9</i>       | 27521192 | 27521273 | rs35848276 | 27521096 | 3.30E-08       | 8.87E-24       | 140.6159875         | 2.08336E-29 |
| 6   | GeneID:100189012 | <i>TRNAR5</i>       | 27529963 | 27530049 | rs35848276 | 27521096 | 3.57E-08       | 9.61E-24       | 140.294354          | 2.44133E-29 |
| 6   | GeneID:100128240 | <i>LOC100128240</i> | 27528605 | 27529550 | rs35848276 | 27521096 | 3.57E-08       | 9.61E-24       | 140.293067          | 2.44288E-29 |
| 6   | GeneID:100507173 | <i>LOC100507173</i> | 27661814 | 27678001 | rs13217620 | 27653120 | 6.23E-08       | 6.45E-24       | 139.9767566         | 2.8551E-29  |
| 6   | GeneID:100189067 | <i>TRNAL10</i>      | 27198334 | 27198416 | rs4713071  | 27187919 | 5.29E-10       | 8.66E-22       | 139.7182869         | 3.24306E-29 |
| 6   | GeneID:100189041 | <i>TRNAS7</i>       | 27177628 | 27177709 | rs4713071  | 27187919 | 4.97E-10       | 9.56E-22       | 139.6416656         | 3.3679E-29  |
| 6   | GeneID:7212      | <i>TRNAM2</i>       | 27745664 | 27745735 | rs35037868 | 27759115 | 7.31E-08       | 6.63E-24       | 139.6042868         | 3.43053E-29 |
| 6   | GeneID:100189167 | <i>TRNAR17</i>      | 27181623 | 27181695 | rs4713071  | 27187919 | 5.12E-10       | 9.84E-22       | 139.524717          | 3.56775E-29 |
| 6   | GeneID:100129755 | <i>RSL24DIP1</i>    | 27748462 | 27748890 | rs35037868 | 27759115 | 7.50E-08       | 6.81E-24       | 139.4979661         | 3.61511E-29 |
| Chr | Gene.id          | Name                | Start    | End      | SNP.id     | SNP.pos  | pval(headache) | pval(hyperPAN) | X <sup>2</sup> ,4df | FCP         |

| 6   | GeneID:100189368 | <i>TRNAV28</i>   | 27173867 | 27173939 | rs4713071  | 27187919 | 5.18E-10       | 9.95E-22       | 139.4820314         | 3.64362E-29 |
|-----|------------------|------------------|----------|----------|------------|----------|----------------|----------------|---------------------|-------------|
| 6   | GeneID:100189074 | <i>TRNAQ10</i>   | 27763640 | 27763711 | rs35037868 | 27759115 | 7.56E-08       | 6.86E-24       | 139.4697483         | 3.66575E-29 |
| 6   | GeneID:100189099 | <i>TRNAR10</i>   | 27182952 | 27183024 | rs4713071  | 27187919 | 5.21E-10       | 1.00E-21       | 139.4561683         | 3.69037E-29 |
| 6   | GeneID:442171    | <i>RPL10P2</i>   | 27179023 | 27179663 | rs4713071  | 27187919 | 5.26E-10       | 1.01E-21       | 139.4168067         | 3.76267E-29 |
| 6   | GeneID:100189214 | <i>TRNAQ17</i>   | 27759135 | 27759206 | rs35037868 | 27759115 | 8.18E-08       | 7.42E-24       | 139.1523664         | 4.28653E-29 |
| 6   | GeneID:100189101 | <i>TRNAV15</i>   | 27696327 | 27696399 | rs34409918 | 27685348 | 1.15E-07       | 9.37E-24       | 137.9972595         | 7.5747E-29  |
| 6   | GeneID:100189164 | <i>TRNAL16</i>   | 27688898 | 27688980 | rs34409918 | 27685348 | 1.22E-07       | 9.88E-24       | 137.7867344         | 8.40285E-29 |
| 6   | GeneID:100189374 | <i>TRNAT18</i>   | 27694473 | 27694546 | rs34409918 | 27685348 | 1.23E-07       | 1.00E-23       | 137.7348705         | 8.62041E-29 |
| 6   | GeneID:394254    | <i>GPR89P</i>    | 27704354 | 27706293 | rs13202291 | 27698857 | 1.60E-07       | 9.03E-24       | 137.4245137         | 1.00451E-28 |
| 6   | GeneID:100189310 | <i>TRNAI17</i>   | 27205350 | 27205423 | rs35589403 | 27219491 | 9.44E-10       | 1.61E-21       | 137.3190874         | 1.05808E-28 |
| 6   | GeneID:645927    | <i>MCFD2P1</i>   | 27375502 | 27377470 | rs34071253 | 27391802 | 1.07E-08       | 1.50E-22       | 137.2157192         | 1.11338E-28 |
| 6   | GeneID:10279     | <i>PRSSI6</i>    | 27215502 | 27224399 | rs35589403 | 27219491 | 1.09E-09       | 1.86E-21       | 136.7456028         | 1.40365E-28 |
| 6   | GeneID:442172    | <i>LOC442172</i> | 27235885 | 27237008 | rs35982103 | 27243134 | 1.09E-09       | 1.92E-21       | 136.6811013         | 1.44898E-28 |
| 6   | GeneID:7202      | <i>TRNAI1</i>    | 27241739 | 27241812 | rs35982103 | 27243134 | 1.11E-09       | 1.97E-21       | 136.5866695         | 1.518E-28   |
| 6   | GeneID:346157    | <i>ZNF391</i>    | 27356524 | 27369227 | rs67859638 | 27357978 | 1.21E-08       | 1.86E-22       | 136.5373525         | 1.55535E-28 |
| 6   | GeneID:100189213 | <i>TRNAI11</i>   | 27242990 | 27243063 | rs35982103 | 27243134 | 1.13E-09       | 2.00E-21       | 136.526175          | 1.56394E-28 |
| 6   | GeneID:7754      | <i>ZNF204P</i>   | 27325602 | 27343153 | rs67859638 | 27357978 | 1.16E-08       | 2.08E-22       | 136.3869608         | 1.67499E-28 |
| 6   | GeneID:100189014 | <i>TRNAV12</i>   | 27203288 | 27203360 | rs13212921 | 27205422 | 1.91E-09       | 1.56E-21       | 135.9623779         | 2.06479E-28 |
| 6   | GeneID:100287272 | <i>USP8P1</i>    | 31243351 | 31246528 | rs9264490  | 31232578 | 5.11E-05       | 8.93E-26       | 135.1205135         | 3.12626E-28 |
| 6   | GeneID:100189345 | <i>TRNAM18</i>   | 27300764 | 27300835 | rs71537559 | 27309779 | 3.24E-08       | 2.08E-22       | 134.3427711         | 4.58606E-28 |
| 6   | GeneID:100189336 | <i>TRNAI20</i>   | 27144994 | 27145067 | rs34569203 | 27153984 | 2.62E-10       | 2.64E-20       | 134.2835347         | 4.72187E-28 |
| 6   | GeneID:100189182 | <i>TRNAK19</i>   | 27302769 | 27302841 | rs71537559 | 27309779 | 3.33E-08       | 2.14E-22       | 134.2320019         | 4.84329E-28 |
| 6   | GeneID:8363      | <i>HIST1H4J</i>  | 27791903 | 27792258 | rs35202262 | 27799514 | 1.21E-07       | 6.72E-23       | 133.9672912         | 5.51794E-28 |
| 6   | GeneID:3107      | <i>HLA-C</i>     | 31236529 | 31239855 | rs1793890  | 31222056 | 6.16E-05       | 1.38E-25       | 133.8794583         | 5.76194E-28 |
| 6   | GeneID:387317    | <i>VNIR11P</i>   | 27051071 | 27051995 | rs6904071  | 27047256 | 1.02E-09       | 8.39E-21       | 133.853817          | 5.83519E-28 |
| 6   | GeneID:100189157 | <i>TRNAS12</i>   | 27065085 | 27065166 | rs34388707 | 27050396 | 8.80E-10       | 1.02E-20       | 133.7640259         | 6.0991E-28  |
| 6   | GeneID:100189301 | <i>TRNAL28</i>   | 27573417 | 27573524 | rs34105070 | 27560805 | 3.65E-08       | 2.49E-22       | 133.7389824         | 6.17481E-28 |
| 6   | GeneID:8362      | <i>HIST1H4K</i>  | 27798952 | 27799305 | rs35202262 | 27799514 | 1.34E-07       | 6.86E-23       | 133.7124981         | 6.2559E-28  |
| Chr | Gene.id          | Name             | Start    | End      | SNP.id     | SNP.pos  | pval(headache) | pval(hyperPAN) | X <sup>2</sup> ,4df | FCP         |

| 6   | GeneID:100189143 | <i>TRNAT7</i>     | 27130050 | 27130123 | rs13194053  | 27143883 | 4.41E-10       | 2.10E-20       | 133.7052474         | 6.27829E-28 |
|-----|------------------|-------------------|----------|----------|-------------|----------|----------------|----------------|---------------------|-------------|
| 6   | GeneID:791231    | <i>TRNAV8</i>     | 27618707 | 27618779 | rs144969912 | 27616843 | 2.89E-08       | 3.29E-22       | 133.654709          | 6.43656E-28 |
| 6   | GeneID:8341      | <i>HIST1H2BN</i>  | 27806440 | 27806888 | rs35202262  | 27799514 | 1.38E-07       | 7.19E-23       | 133.5672351         | 6.71998E-28 |
| 6   | GeneID:8330      | <i>HIST1H2AK</i>  | 27805658 | 27806117 | rs35202262  | 27799514 | 1.38E-07       | 7.19E-23       | 133.5662836         | 6.72313E-28 |
| 6   | GeneID:100189172 | <i>TRNAP10</i>    | 27059521 | 27059592 | rs6904071   | 27047256 | 8.75E-10       | 1.15E-20       | 133.5421123         | 6.80367E-28 |
| 6   | GeneID:387046    | <i>RPL8P1</i>     | 27620370 | 27620512 | rs144969912 | 27616843 | 3.02E-08       | 3.44E-22       | 133.4761947         | 7.02822E-28 |
| 6   | GeneID:100189038 | <i>TRNAL8</i>     | 27570348 | 27570454 | rs34105070  | 27560805 | 3.95E-08       | 2.70E-22       | 133.4204299         | 7.22397E-28 |
| 6   | GeneID:100189297 | <i>TRNAM15</i>    | 27560600 | 27560671 | rs34105070  | 27560805 | 4.16E-08       | 2.84E-22       | 133.2156259         | 7.99082E-28 |
| 6   | GeneID:790951    | <i>TRNAS4</i>     | 27499987 | 27500068 | rs13195636  | 27509493 | 2.93E-08       | 5.08E-22       | 132.7506296         | 1.00477E-27 |
| 6   | GeneID:100189095 | <i>TRNAI5</i>     | 27636362 | 27636435 | rs56405707  | 27640246 | 4.12E-08       | 3.66E-22       | 132.7283732         | 1.01585E-27 |
| 6   | GeneID:8969      | <i>HIST1H2AG</i>  | 27100817 | 27101314 | rs67330695  | 27103654 | 7.43E-10       | 2.12E-20       | 132.6407316         | 1.06066E-27 |
| 6   | GeneID:85236     | <i>HIST1H2BK</i>  | 27106072 | 27114637 | rs61240102  | 27124904 | 7.30E-10       | 2.16E-20       | 132.6401219         | 1.06098E-27 |
| 6   | GeneID:8970      | <i>HIST1H2BJ</i>  | 27100095 | 27100575 | rs67330695  | 27103654 | 7.66E-10       | 2.18E-20       | 132.5225826         | 1.12422E-27 |
| 6   | GeneID:387322    | <i>VNIRI3P</i>    | 27028149 | 27029046 | rs35608615  | 27040402 | 2.60E-09       | 8.84E-21       | 131.8859587         | 1.53827E-27 |
| 6   | GeneID:100189462 | <i>TRNAI28P</i>   | 27251864 | 27251937 | rs35982103  | 27243134 | 1.35E-09       | 1.81E-20       | 131.7612361         | 1.63573E-27 |
| 6   | GeneID:100189363 | <i>TRNAV27</i>    | 27248049 | 27248121 | rs35982103  | 27243134 | 1.38E-09       | 1.84E-20       | 131.6862912         | 1.69724E-27 |
| 6   | GeneID:100189219 | <i>TRNAY8</i>     | 26595102 | 26595190 | rs34781270  | 26593037 | 8.07E-10       | 3.29E-20       | 131.596669          | 1.77383E-27 |
| 6   | GeneID:100189200 | <i>TRNAD9</i>     | 27551236 | 27551307 | rs34105070  | 27560805 | 4.26E-08       | 6.39E-22       | 131.546418          | 1.81828E-27 |
| 6   | GeneID:100189053 | <i>TRNAK8</i>     | 27559593 | 27559665 | rs34105070  | 27560805 | 4.29E-08       | 6.42E-22       | 131.522724          | 1.83962E-27 |
| 6   | GeneID:11119     | <i>BTN3A1</i>     | 26402465 | 26415444 | rs2072803   | 26392515 | 1.17E-10       | 2.43E-19       | 131.4647085         | 1.89294E-27 |
| 6   | GeneID:100189408 | <i>TRNAV31</i>    | 27258405 | 27258477 | rs13207082  | 27251379 | 2.01E-09       | 1.57E-20       | 131.2482653         | 2.10588E-27 |
| 6   | GeneID:100189390 | <i>TRNAK31</i>    | 27543846 | 27543918 | rs10484399  | 27534528 | 5.29E-08       | 5.99E-22       | 131.2419683         | 2.11242E-27 |
| 6   | GeneID:29777     | <i>ABT1</i>       | 26597171 | 26600278 | rs34781270  | 26593037 | 8.44E-10       | 3.88E-20       | 131.1773656         | 2.18071E-27 |
| 6   | GeneID:10337     | <i>HIST1H4PS1</i> | 27774945 | 27775115 | rs13195728  | 27771106 | 1.50E-07       | 2.26E-22       | 131.1069551         | 2.25765E-27 |
| 6   | GeneID:8329      | <i>HIST1H2AI</i>  | 27775977 | 27776445 | rs13195728  | 27771106 | 1.53E-07       | 2.29E-22       | 131.0457083         | 2.32679E-27 |
| 6   | GeneID:8340      | <i>HIST1H2BL</i>  | 27775257 | 27775709 | rs13195728  | 27771106 | 1.54E-07       | 2.31E-22       | 131.0162737         | 2.36076E-27 |
| 6   | GeneID:645950    | <i>HNRNPA1P1</i>  | 27491226 | 27492316 | rs34573979  | 27480526 | 1.61E-08       | 2.21E-21       | 131.0063992         | 2.37227E-27 |
| 6   | GeneID:100189162 | <i>TRNAY7</i>     | 26577332 | 26577420 | rs13190739  | 26587373 | 9.73E-10       | 3.70E-20       | 130.9877844         | 2.39412E-27 |
| Chr | Gene.id          | Name              | Start    | End      | SNP.id      | SNP.pos  | pval(headache) | pval(hyperPAN) | X <sup>2</sup> ,4df | FCP         |



| 6   | GeneID:100189526 | <i>TRNAS32P</i>     | 27261671 | 27261744 | rs13207082  | 27251379 | 2.15E-09       | 1.68E-20       | 130.977748          | 2.40598E-27 |
|-----|------------------|---------------------|----------|----------|-------------|----------|----------------|----------------|---------------------|-------------|
| 6   | GeneID:387316    | <i>VNIR10P</i>      | 27292695 | 27293631 | rs56401801  | 27301512 | 4.43E-08       | 8.29E-22       | 130.9488136         | 2.44051E-27 |
| 6   | GeneID:54718     | <i>BTN2A3P</i>      | 26421619 | 26430816 | rs9379875   | 26444732 | 4.74E-10       | 7.98E-20       | 130.8890807         | 2.51337E-27 |
| 6   | GeneID:100189329 | <i>TRNAQ27</i>      | 27263212 | 27263283 | rs13207082  | 27251379 | 2.22E-09       | 1.74E-20       | 130.8521378         | 2.55952E-27 |
| 6   | GeneID:100189002 | <i>TRNAS5</i>       | 27265775 | 27265856 | rs13207082  | 27251379 | 2.16E-09       | 1.80E-20       | 130.8317557         | 2.58534E-27 |
| 6   | GeneID:83954     | <i>FKSG83</i>       | 27292578 | 27293742 | rs56401801  | 27301512 | 4.58E-08       | 8.57E-22       | 130.8165001         | 2.60483E-27 |
| 6   | GeneID:8342      | <i>HIST1H2BM</i>    | 27782822 | 27783267 | rs13195728  | 27771106 | 1.63E-07       | 2.45E-22       | 130.774732          | 2.65897E-27 |
| 6   | GeneID:79692     | <i>ZNF322</i>       | 26634611 | 26659980 | rs149123117 | 26670618 | 7.23E-10       | 5.68E-20       | 130.7248012         | 2.72516E-27 |
| 6   | GeneID:8357      | <i>HIST1H3H</i>     | 27777842 | 27778314 | rs13195728  | 27771106 | 1.65E-07       | 2.49E-22       | 130.7235653         | 2.72682E-27 |
| 6   | GeneID:8331      | <i>HIST1H2AJ</i>    | 27782080 | 27782518 | rs13195728  | 27771106 | 1.66E-07       | 2.50E-22       | 130.7050113         | 2.75185E-27 |
| 6   | GeneID:100189189 | <i>TRNAQ16</i>      | 27487308 | 27487379 | rs34573979  | 27480526 | 1.74E-08       | 2.39E-21       | 130.6942031         | 2.76654E-27 |
| 6   | GeneID:100189337 | <i>TRNAY12</i>      | 26575798 | 26575887 | rs13190739  | 26587373 | 1.07E-09       | 4.06E-20       | 130.6230442         | 2.8652E-27  |
| 6   | GeneID:791230    | <i>TRNAV7</i>       | 27721179 | 27721251 | rs17693963  | 27710165 | 1.55E-07       | 2.89E-22       | 130.5543215         | 2.96383E-27 |
| 6   | GeneID:100131289 | <i>LOC100131289</i> | 27729523 | 27730966 | rs35501037  | 27739566 | 1.70E-07       | 2.67E-22       | 130.5238055         | 3.00871E-27 |
| 6   | GeneID:100270746 | <i>LOC100270746</i> | 26987145 | 26988085 | rs13217285  | 26999845 | 4.70E-09       | 1.15E-20       | 130.1831331         | 3.55826E-27 |
| 6   | GeneID:100189028 | <i>TRNAI2</i>       | 26988125 | 26988218 | rs13217285  | 26999845 | 4.86E-09       | 1.19E-20       | 130.0483416         | 3.80246E-27 |
| 6   | GeneID:100189372 | <i>TRNAI22</i>      | 26745255 | 26745328 | rs13213200  | 26755915 | 2.38E-10       | 2.46E-19       | 130.0174634         | 3.86072E-27 |
| 6   | GeneID:10385     | <i>BTN2A2</i>       | 26383324 | 26395102 | rs2072803   | 26392515 | 1.73E-10       | 3.61E-19       | 129.8856555         | 4.11961E-27 |
| 6   | GeneID:387321    | <i>VNIR12P</i>      | 27001125 | 27002122 | rs35741362  | 27007687 | 4.07E-09       | 1.57E-20       | 129.8354145         | 4.2228E-27  |
| 6   | GeneID:100126484 | <i>TRNAM-CAU</i>    | 26735574 | 26735646 | rs35144506  | 26739487 | 5.93E-10       | 1.16E-19       | 129.6914549         | 4.533E-27   |
| 6   | GeneID:696       | <i>BTN1A1</i>       | 26501495 | 26510653 | rs34148261  | 26511744 | 1.28E-09       | 5.62E-20       | 129.5992307         | 4.7436E-27  |
| 6   | GeneID:100189272 | <i>TRNAY10</i>      | 26569086 | 26569176 | rs72844462  | 26563864 | 1.98E-09       | 3.82E-20       | 129.5045956         | 4.96987E-27 |
| 6   | GeneID:100009603 | <i>TRNA42</i>       | 26572092 | 26572164 | rs72844462  | 26563864 | 2.07E-09       | 4.00E-20       | 129.3257357         | 5.42742E-27 |
| 6   | GeneID:387320    | <i>VNIR14P</i>      | 26631313 | 26631964 | rs67777156  | 26633711 | 1.99E-09       | 4.67E-20       | 129.0867765         | 6.10508E-27 |
| 6   | GeneID:10384     | <i>BTN3A3</i>       | 26440700 | 26453643 | rs9379875   | 26444732 | 6.71E-10       | 1.53E-19       | 128.8917373         | 6.72043E-27 |
| 6   | GeneID:100652981 | <i>LOC100652981</i> | 26854360 | 26854727 | rs77666565  | 26851415 | 1.36E-09       | 1.51E-19       | 127.5025973         | 1.33171E-26 |
| 6   | GeneID:100420941 | <i>LOC100420941</i> | 26478093 | 26478749 | rs13195401  | 26463574 | 7.28E-10       | 2.94E-19       | 127.4212788         | 1.38611E-26 |
| 6   | GeneID:729392    | <i>POM121L6P</i>    | 26838446 | 26865940 | rs77666565  | 26851415 | 1.77E-09       | 1.96E-19       | 126.4497651         | 2.23607E-26 |
| Chr | Gene.id          | Name                | Start    | End      | SNP.id      | SNP.pos  | pval(headache) | pval(hyperPAN) | X <sup>2</sup> ,4df | FCP         |

| 6   | GeneID:387036    | <i>GUSBP2</i>     | 26839266 | 26924333 | rs77666565 | 26851415 | 2.51E-09       | 1.46E-19       | 126.3452953         | 2.35406E-26 |
|-----|------------------|-------------------|----------|----------|------------|----------|----------------|----------------|---------------------|-------------|
| 6   | GeneID:11120     | <i>BTN2A1</i>     | 26458153 | 26476849 | rs9379875  | 26444732 | 7.43E-10       | 5.28E-19       | 126.211557          | 2.51423E-26 |
| 6   | GeneID:94026     | <i>POM121L2</i>   | 27276842 | 27280011 | rs56114371 | 27274834 | 2.66E-08       | 1.57E-20       | 126.091542          | 2.66723E-26 |
| 6   | GeneID:352996    | <i>P5-04</i>      | 29910314 | 29910426 | rs2524005  | 29899677 | 3.23E-04       | 1.31E-24       | 126.0580137         | 2.71161E-26 |
| 6   | GeneID:3105      | <i>HLA-A</i>      | 29910247 | 29913661 | rs2524005  | 29899677 | 3.23E-04       | 1.31E-24       | 126.053422          | 2.71774E-26 |
| 6   | GeneID:352994    | <i>P5-05</i>      | 29894219 | 29894350 | rs2524005  | 29899677 | 3.24E-04       | 1.32E-24       | 126.0435682         | 2.73096E-26 |
| 6   | GeneID:285819    | <i>LOC285819</i>  | 26472172 | 26482737 | rs13195401 | 26463574 | 1.02E-09       | 4.21E-19       | 126.0221804         | 2.75986E-26 |
| 6   | GeneID:80868     | <i>HCG4B</i>      | 29892369 | 29893428 | rs2524005  | 29899677 | 3.31E-04       | 1.35E-24       | 125.9524776         | 2.85618E-26 |
| 6   | GeneID:3138      | <i>HLA-K</i>      | 29894436 | 29897616 | rs2524005  | 29899677 | 3.34E-04       | 1.36E-24       | 125.9224376         | 2.89872E-26 |
| 6   | GeneID:353003    | <i>HCG4P5</i>     | 29908689 | 29909578 | rs2524005  | 29899677 | 3.36E-04       | 1.37E-24       | 125.8914393         | 2.94329E-26 |
| 6   | GeneID:352965    | <i>HLA-U</i>      | 29901541 | 29902657 | rs2524005  | 29899677 | 3.42E-04       | 1.39E-24       | 125.8260977         | 3.03948E-26 |
| 6   | GeneID:352995    | <i>P5.8</i>       | 29903015 | 29904157 | rs2524005  | 29899677 | 3.59E-04       | 1.46E-24       | 125.6306466         | 3.34639E-26 |
| 6   | GeneID:23540     | <i>TRNAS3</i>     | 27473607 | 27473688 | rs34573979 | 27480526 | 1.56E-08       | 4.28E-20       | 125.1454114         | 4.24903E-26 |
| 6   | GeneID:100189292 | <i>TRNAD14</i>    | 27471523 | 27471594 | rs34573979 | 27480526 | 1.64E-08       | 4.50E-20       | 124.9409287         | 4.69887E-26 |
| 6   | GeneID:100189247 | <i>TRNAS19</i>    | 27470818 | 27470899 | rs34573979 | 27480526 | 1.70E-08       | 4.65E-20       | 124.8137313         | 5.00241E-26 |
| 6   | GeneID:23437     | <i>TRNAS2</i>     | 27463593 | 27463674 | rs58616630 | 27474715 | 1.71E-08       | 4.96E-20       | 124.6663749         | 5.37863E-26 |
| 6   | GeneID:100189077 | <i>TRNAS10</i>    | 27446591 | 27446672 | rs7749305  | 27446566 | 1.40E-07       | 5.96E-20       | 120.0963523         | 5.09426E-25 |
| 6   | GeneID:100189158 | <i>TRNAD8</i>     | 27447453 | 27447524 | rs7749305  | 27446566 | 1.41E-07       | 6.01E-20       | 120.0586113         | 5.1897E-25  |
| 6   | GeneID:100189288 | <i>TRNAL26</i>    | 26521436 | 26521518 | rs66941101 | 26530376 | 5.88E-10       | 7.08E-17       | 116.880848          | 2.47587E-24 |
| 6   | GeneID:7231      | <i>TRNAR2</i>     | 26537726 | 26537798 | rs66941101 | 26530376 | 5.18E-10       | 8.13E-17       | 116.8600286         | 2.50134E-24 |
| 6   | GeneID:100189227 | <i>TRNAV21</i>    | 26538282 | 26538354 | rs66941101 | 26530376 | 5.21E-10       | 8.18E-17       | 116.8356394         | 2.53151E-24 |
| 6   | GeneID:100189319 | <i>TRNAT14</i>    | 26533145 | 26533218 | rs66941101 | 26530376 | 6.04E-10       | 9.74E-17       | 116.191704          | 3.47415E-24 |
| 6   | GeneID:493812    | <i>HCG11</i>      | 26521934 | 26527621 | rs66941101 | 26530376 | 7.02E-10       | 8.45E-17       | 116.1731198         | 3.50604E-24 |
| 6   | GeneID:100189223 | <i>TRNAPI3</i>    | 26555498 | 26555569 | rs34246779 | 26549212 | 1.10E-09       | 5.64E-17       | 116.086537          | 3.65847E-24 |
| 6   | GeneID:100189110 | <i>TRNAK14</i>    | 26556774 | 26556846 | rs34246779 | 26549212 | 1.11E-09       | 5.67E-17       | 116.0611405         | 3.70442E-24 |
| 6   | GeneID:100189391 | <i>TRNAM20</i>    | 26766444 | 26766516 | rs13213200 | 26755915 | 2.73E-10       | 2.36E-16       | 116.0086179         | 3.8013E-24  |
| 6   | GeneID:100289545 | <i>HIST1H3PS1</i> | 26322104 | 26343616 | rs9393703  | 26356951 | 7.53E-10       | 8.62E-17       | 115.9924178         | 3.83169E-24 |
| 6   | GeneID:100189153 | <i>TRNAI9</i>     | 26554350 | 26554423 | rs34246779 | 26549212 | 1.13E-09       | 5.78E-17       | 115.9892657         | 3.83763E-24 |
| Chr | Gene.id          | Name              | Start    | End      | SNP.id     | SNP.pos  | pval(headache) | pval(hyperPAN) | X <sup>2</sup> ,4df | FCP         |

| 6   | GeneID:10473     | <i>HMGN4</i>        | 26538572 | 26547165 | rs66941101  | 26530376 | 7.01E-10       | 1.10E-16       | 115.6470584         | 4.54058E-24 |
|-----|------------------|---------------------|----------|----------|-------------|----------|----------------|----------------|---------------------|-------------|
| 6   | GeneID:100189354 | <i>TRNAM19</i>      | 26758550 | 26758622 | rs13213200  | 26755915 | 3.16E-10       | 2.73E-16       | 115.4254975         | 5.06296E-24 |
| 6   | GeneID:100189308 | <i>TRNAA29</i>      | 26553731 | 26553802 | rs34246779  | 26549212 | 1.07E-09       | 8.57E-17       | 115.2968217         | 5.39349E-24 |
| 6   | GeneID:80864     | <i>EGFL8</i>        | 32132382 | 32136062 | rs192471087 | 32119730 | 1.94E-03       | 5.24E-23       | 115.1005631         | 5.93963E-24 |
| 6   | GeneID:100189369 | <i>TRNAA37</i>      | 26682715 | 26682787 | rs149123117 | 26670618 | 3.78E-10       | 3.17E-16       | 114.7680319         | 6.99411E-24 |
| 6   | GeneID:100189156 | <i>TRNAA20</i>      | 26771290 | 26771362 | rs34244947  | 26761745 | 7.29E-10       | 1.78E-16       | 114.6125373         | 7.54951E-24 |
| 6   | GeneID:80863     | <i>PRRT1</i>        | 32116140 | 32119720 | rs192471087 | 32119730 | 2.26E-03       | 6.12E-23       | 114.4781213         | 8.06503E-24 |
| 6   | GeneID:100507547 | <i>LOC100507547</i> | 32120579 | 32122142 | rs192471087 | 32119730 | 2.27E-03       | 6.13E-23       | 114.4739154         | 8.08172E-24 |
| 6   | GeneID:9374      | <i>PPT2</i>         | 32121229 | 32131458 | rs192471087 | 32119730 | 2.40E-03       | 6.49E-23       | 114.2455912         | 9.04131E-24 |
| 6   | GeneID:100532746 | <i>PPT2-EGFL8</i>   | 32121776 | 32136062 | rs192471087 | 32119730 | 2.40E-03       | 6.49E-23       | 114.2451296         | 9.04337E-24 |
| 6   | GeneID:100189358 | <i>TRNAA36</i>      | 26673590 | 26673662 | rs149123117 | 26670618 | 4.92E-10       | 4.13E-16       | 113.7086751         | 1.17709E-23 |
| 6   | GeneID:100507100 | <i>LOC100507100</i> | 26681354 | 26688069 | rs149123117 | 26670618 | 5.23E-10       | 4.39E-16       | 113.4637843         | 1.3276E-23  |
| 6   | GeneID:11118     | <i>BTN3A2</i>       | 26365398 | 26378548 | rs2072803   | 26392515 | 1.58E-10       | 1.48E-15       | 113.4352533         | 1.34634E-23 |
| 6   | GeneID:100507141 | <i>LOC100507141</i> | 26864941 | 26865525 | rs77666565  | 26851415 | 1.32E-09       | 4.15E-16       | 111.7317498         | 3.10893E-23 |
| 6   | GeneID:729400    | <i>LOC729400</i>    | 26866104 | 26868093 | rs77666565  | 26851415 | 1.32E-09       | 4.16E-16       | 111.7144726         | 3.13542E-23 |
| 6   | GeneID:100126501 | <i>TRNAA-AGC</i>    | 26796006 | 26796078 | rs7454868   | 26799828 | 3.57E-10       | 2.03E-15       | 111.1628361         | 4.11122E-23 |
| 6   | GeneID:100129921 | <i>RPL15P4</i>      | 31495853 | 31496498 | rs114751021 | 31504194 | 6.52E-03       | 7.40E-22       | 107.3754523         | 2.64002E-22 |
| 6   | GeneID:100189410 | <i>TRNAR28</i>      | 26323046 | 26323118 | rs34107459  | 26328353 | 1.01E-07       | 5.16E-17       | 107.2217591         | 2.84689E-22 |
| 6   | GeneID:100189382 | <i>TRNAS25</i>      | 26327817 | 26327898 | rs9467714   | 26340785 | 9.25E-08       | 5.80E-17       | 107.1637685         | 2.92908E-22 |
| 6   | GeneID:100189396 | <i>TRNAR26</i>      | 26328368 | 26328440 | rs9467714   | 26340785 | 9.83E-08       | 6.16E-17       | 106.9226578         | 3.29707E-22 |
| 6   | GeneID:100189040 | <i>TRNAM4</i>       | 26330529 | 26330600 | rs9467714   | 26340785 | 9.87E-08       | 6.19E-17       | 106.9032616         | 3.32861E-22 |
| 6   | GeneID:100189048 | <i>TRNAW2</i>       | 26331672 | 26331743 | rs9467714   | 26340785 | 1.03E-07       | 6.47E-17       | 106.7265798         | 3.63014E-22 |
| 6   | GeneID:100189185 | <i>TRNAQ15</i>      | 26311975 | 26312046 | rs13220522  | 26316295 | 1.10E-07       | 1.32E-16       | 105.1807334         | 7.75141E-22 |
| 6   | GeneID:100189321 | <i>TRNAQ25</i>      | 26311424 | 26311495 | rs13220522  | 26316295 | 1.10E-07       | 1.32E-16       | 105.1805513         | 7.7521E-22  |
| 6   | GeneID:100189436 | <i>TRNAW9</i>       | 26319330 | 26319401 | rs34107459  | 26328353 | 9.91E-08       | 1.54E-16       | 105.0738218         | 8.16889E-22 |
| 6   | GeneID:100189094 | <i>TRNAM6</i>       | 26313352 | 26313423 | rs34107459  | 26328353 | 1.01E-07       | 1.57E-16       | 104.9892892         | 8.51483E-22 |
| 6   | GeneID:100189430 | <i>TRNAS27</i>      | 26312824 | 26312905 | rs13220522  | 26316295 | 1.20E-07       | 1.45E-16       | 104.8175773         | 9.26328E-22 |
| 6   | GeneID:100189218 | <i>TRNAS16</i>      | 26305718 | 26305801 | rs13220522  | 26316295 | 1.53E-07       | 1.84E-16       | 103.8452681         | 1.49255E-21 |
| Chr | Gene.id          | Name                | Start    | End      | SNP.id      | SNP.pos  | pval(headache) | pval(hyperPAN) | X <sup>2</sup> ,4df | FCP         |

| 6   | GeneID:8344      | <i>HIST1H2BE</i>    | 26184024 | 26184458 | rs67575965  | 26196593 | 5.08E-09       | 7.05E-15       | 103.3690161         | 1.88533E-21 |
|-----|------------------|---------------------|----------|----------|-------------|----------|----------------|----------------|---------------------|-------------|
| 6   | GeneID:7232      | <i>TRNAR3</i>       | 26299905 | 26299977 | rs10484439  | 26309908 | 1.80E-07       | 2.40E-16       | 102.9967861         | 2.26297E-21 |
| 6   | GeneID:8345      | <i>HIST1H2BH</i>    | 26251879 | 26252303 | rs55706012  | 26266311 | 1.36E-07       | 3.52E-16       | 102.7840384         | 2.51186E-21 |
| 6   | GeneID:8355      | <i>HIST1H3G</i>     | 26271146 | 26271612 | rs55706012  | 26266311 | 1.37E-07       | 3.55E-16       | 102.7592755         | 2.54255E-21 |
| 6   | GeneID:8360      | <i>HIST1H4D</i>     | 26188938 | 26189304 | rs67575965  | 26196593 | 5.99E-09       | 8.32E-15       | 102.7082795         | 2.60694E-21 |
| 6   | GeneID:8346      | <i>HIST1H2BI</i>    | 26273204 | 26273640 | rs55706012  | 26266311 | 1.39E-07       | 3.59E-16       | 102.7057984         | 2.61012E-21 |
| 6   | GeneID:100507025 | <i>LOC100507025</i> | 26281278 | 26285763 | rs55706012  | 26266311 | 1.41E-07       | 3.66E-16       | 102.636732          | 2.70004E-21 |
| 6   | GeneID:8333      | <i>HIST1H2APS4</i>  | 26272421 | 26272768 | rs55706012  | 26266311 | 1.43E-07       | 3.71E-16       | 102.580006          | 2.77622E-21 |
| 6   | GeneID:394255    | <i>RPS10P1</i>      | 26202351 | 26202943 | rs67575965  | 26196593 | 7.07E-09       | 9.83E-15       | 102.0402935         | 3.61746E-21 |
| 6   | GeneID:8343      | <i>HIST1H2BF</i>    | 26199787 | 26200216 | rs67575965  | 26196593 | 7.17E-09       | 9.96E-15       | 101.9890426         | 3.70953E-21 |
| 6   | GeneID:3013      | <i>HIST1H2AD</i>    | 26199012 | 26199471 | rs67575965  | 26196593 | 7.38E-09       | 1.02E-14       | 101.8736624         | 3.92546E-21 |
| 6   | GeneID:8351      | <i>HIST1H3D</i>     | 26197012 | 26199464 | rs67575965  | 26196593 | 7.56E-09       | 1.05E-14       | 101.7773068         | 4.11539E-21 |
| 6   | GeneID:8367      | <i>HIST1H4E</i>     | 26204873 | 26205249 | rs67575965  | 26196593 | 6.51E-09       | 1.53E-14       | 101.3245698         | 5.13834E-21 |
| 6   | GeneID:442191    | <i>OR14J1</i>       | 29274467 | 29275432 | rs150254595 | 29278406 | 6.51E-04       | 1.55E-18       | 96.68658784         | 4.98887E-20 |
| 6   | GeneID:100379623 | <i>LOC100379623</i> | 26164261 | 26168404 | rs17598658  | 26175866 | 8.29E-08       | 1.48E-14       | 96.30114009         | 6.02562E-20 |
| 6   | GeneID:352957    | <i>MICF</i>         | 29819964 | 29821829 | rs114853934 | 29812896 | 8.48E-04       | 1.80E-18       | 95.86164362         | 7.47293E-20 |
| 6   | GeneID:3017      | <i>HIST1H2BD</i>    | 26158349 | 26171577 | rs17598658  | 26175866 | 1.06E-07       | 1.89E-14       | 95.32378821         | 9.72504E-20 |
| 6   | GeneID:353009    | <i>3.8-1.4</i>      | 29833692 | 29834864 | rs62389319  | 29847388 | 1.35E-03       | 2.51E-18       | 94.27802719         | 1.62287E-19 |
| 6   | GeneID:100188987 | <i>TRNAH3</i>       | 27125906 | 27125977 | rs67540232  | 27140866 | 4.78E-10       | 7.96E-12       | 94.03417807         | 1.82866E-19 |
| 6   | GeneID:100422934 | <i>MIR3143</i>      | 27115405 | 27115467 | rs61240102  | 27124904 | 6.22E-10       | 7.73E-12       | 93.56789875         | 2.29758E-19 |
| 6   | GeneID:85235     | <i>HIST1H2AH</i>    | 27114908 | 27115346 | rs61240102  | 27124904 | 6.22E-10       | 7.73E-12       | 93.56771237         | 2.29779E-19 |
| 6   | GeneID:8294      | <i>HIST1H4I</i>     | 27107088 | 27107457 | rs67330695  | 27103654 | 6.42E-10       | 7.69E-12       | 93.51446896         | 2.35847E-19 |
| 6   | GeneID:100189196 | <i>TRNAV20</i>      | 27118022 | 27118094 | rs61240102  | 27124904 | 6.31E-10       | 7.84E-12       | 93.5092957          | 2.36445E-19 |
| 6   | GeneID:401250    | <i>MCCD1</i>        | 31496739 | 31498008 | rs114751021 | 31504194 | 6.50E-03       | 1.41E-17       | 87.67068765         | 4.11313E-18 |
| 6   | GeneID:352993    | <i>HCP5P6</i>       | 29883530 | 29885892 | rs2524005   | 29899677 | 2.56E-04       | 4.79E-16       | 87.0880627          | 5.46836E-18 |
| 6   | GeneID:353008    | <i>3.8-1.3</i>      | 29878012 | 29879177 | rs1632908   | 29893403 | 6.35E-04       | 5.80E-16       | 84.89182774         | 1.59927E-17 |
| 6   | GeneID:3077      | <i>HFE</i>          | 26087509 | 26095469 | rs71557316  | 26072981 | 4.78E-08       | 1.70E-11       | 83.31414013         | 3.45585E-17 |
| 6   | GeneID:3006      | <i>HIST1H1C</i>     | 26055968 | 26056699 | rs3752417   | 26045905 | 3.96E-08       | 2.09E-11       | 83.2737902          | 3.52462E-17 |
| Chr | Gene.id          | Name                | Start    | End      | SNP.id      | SNP.pos  | pval(headache) | pval(hyperPAN) | X <sup>2</sup> ,4df | FCP         |

| 6   | GeneID:8335      | <i>HIST1H2AB</i>    | 26033320 | 26033796 | rs3752417   | 26045905 | 3.79E-08       | 2.75E-11       | 82.80920329         | 4.42204E-17 |
|-----|------------------|---------------------|----------|----------|-------------|----------|----------------|----------------|---------------------|-------------|
| 6   | GeneID:8352      | <i>HIST1H3C</i>     | 26045639 | 26046097 | rs3752417   | 26045905 | 3.84E-08       | 2.78E-11       | 82.76454322         | 4.51952E-17 |
| 6   | GeneID:10341     | <i>HIST1H2APS5</i>  | 26044128 | 26044778 | rs3752417   | 26045905 | 3.85E-08       | 2.79E-11       | 82.752819           | 4.54546E-17 |
| 6   | GeneID:8358      | <i>HIST1H3B</i>     | 26031817 | 26032288 | rs3752417   | 26045905 | 3.87E-08       | 2.80E-11       | 82.73338552         | 4.58879E-17 |
| 6   | GeneID:8334      | <i>HIST1H2AC</i>    | 26124373 | 26124918 | rs13200797  | 26122957 | 7.26E-08       | 1.53E-11       | 82.67757849         | 4.71553E-17 |
| 6   | GeneID:8347      | <i>HIST1H2BC</i>    | 26123695 | 26124132 | rs13200797  | 26122957 | 7.28E-08       | 1.54E-11       | 82.66446467         | 4.74581E-17 |
| 6   | GeneID:3018      | <i>HIST1H2BB</i>    | 26043455 | 26043885 | rs3752417   | 26045905 | 3.94E-08       | 2.85E-11       | 82.65893146         | 4.75865E-17 |
| 6   | GeneID:8364      | <i>HIST1H4C</i>     | 26104176 | 26104565 | rs2237228   | 26104630 | 5.85E-08       | 2.25E-11       | 82.34548374         | 5.54546E-17 |
| 6   | GeneID:10246     | <i>SLC17A2</i>      | 25912982 | 25930946 | rs35169013  | 25918027 | 4.09E-08       | 4.02E-11       | 81.89941815         | 6.8944E-17  |
| 6   | GeneID:85303     | <i>HIST1H2APS2</i>  | 25882154 | 25882644 | rs13208859  | 25894609 | 4.48E-08       | 3.82E-11       | 81.81832739         | 7.17274E-17 |
| 6   | GeneID:10338     | <i>HIST1H1PS2</i>   | 26016335 | 26017069 | rs10484435  | 26031811 | 7.15E-08       | 2.71E-11       | 81.56924831         | 8.09989E-17 |
| 6   | GeneID:3024      | <i>HIST1H1A</i>     | 26017260 | 26018040 | rs10484435  | 26031811 | 7.42E-08       | 2.81E-11       | 81.42316639         | 8.69843E-17 |
| 6   | GeneID:8366      | <i>HIST1H4B</i>     | 26027124 | 26027480 | rs10484435  | 26031811 | 7.48E-08       | 2.83E-11       | 81.38956427         | 8.84224E-17 |
| 6   | GeneID:8350      | <i>HIST1H3A</i>     | 26020718 | 26021186 | rs10484435  | 26031811 | 7.65E-08       | 2.90E-11       | 81.30187517         | 9.22884E-17 |
| 6   | GeneID:8359      | <i>HIST1H4A</i>     | 26021907 | 26022278 | rs10484435  | 26031811 | 7.66E-08       | 2.90E-11       | 81.2960825          | 9.25496E-17 |
| 6   | GeneID:10786     | <i>SLC17A3</i>      | 25845328 | 25874471 | rs6913795   | 25848025 | 5.33E-08       | 4.74E-11       | 81.03944528         | 1.04897E-16 |
| 6   | GeneID:10475     | <i>TRIM38</i>       | 25963071 | 25985358 | rs13203673  | 25979122 | 7.55E-08       | 3.50E-11       | 80.94834927         | 1.09665E-16 |
| 6   | GeneID:6568      | <i>SLC17A1</i>      | 25783125 | 25832287 | rs9467607   | 25809477 | 3.82E-08       | 7.67E-11       | 80.74390135         | 1.21169E-16 |
| 6   | GeneID:10050     | <i>SLC17A4</i>      | 25754927 | 25781403 | rs13200921  | 25790378 | 3.74E-08       | 1.72E-10       | 79.16713793         | 2.61472E-16 |
| 6   | GeneID:10590     | <i>SCGN</i>         | 25652429 | 25702011 | rs35436081  | 25700342 | 6.86E-08       | 1.84E-10       | 77.8185462          | 5.04651E-16 |
| 6   | GeneID:221613    | <i>HIST1H2AA</i>    | 25726291 | 25726790 | rs34493019  | 25714959 | 1.72E-07       | 1.65E-10       | 76.20023435         | 1.11047E-15 |
| 6   | GeneID:255626    | <i>HIST1H2BA</i>    | 25727137 | 25727573 | rs34493019  | 25714959 | 1.75E-07       | 1.69E-10       | 76.11882826         | 1.1554E-15  |
| 6   | GeneID:353014    | <i>HCG4P9</i>       | 29766201 | 29767903 | rs143525179 | 29751998 | 7.75E-06       | 2.00E-11       | 72.80774839         | 5.79315E-15 |
| 6   | GeneID:353016    | <i>HCP5P13</i>      | 29760911 | 29762023 | rs143525179 | 29751998 | 1.01E-05       | 2.61E-11       | 71.74453178         | 9.71791E-15 |
| 6   | GeneID:352962    | <i>HLA-V</i>        | 29759530 | 29760527 | rs143525179 | 29751998 | 1.07E-05       | 2.75E-11       | 71.52552693         | 1.08103E-14 |
| 6   | GeneID:554223    | <i>LOC554223</i>    | 29759683 | 29765584 | rs143525179 | 29751998 | 1.07E-05       | 2.75E-11       | 71.52303816         | 1.08234E-14 |
| 6   | GeneID:54435     | <i>HCG4</i>         | 29758808 | 29760850 | rs143525179 | 29751998 | 1.07E-05       | 2.75E-11       | 71.52221273         | 1.08277E-14 |
| 6   | GeneID:100419971 | <i>LOC100419971</i> | 25679007 | 25679651 | rs13191296  | 25684606 | 4.57E-07       | 2.33E-09       | 68.94718522         | 3.78629E-14 |
| Chr | Gene.id          | Name                | Start    | End      | SNP.id      | SNP.pos  | pval(headache) | pval(hyperPAN) | X <sup>2</sup> ,4df | FCP         |

| 6   | GeneID:346171    | <i>ZFP57</i>        | 29640169  | 29644931  | rs138358844 | 29659400  | 7.55E-03       | 4.07E-13       | 66.83102448         | 1.05823E-13 |
|-----|------------------|---------------------|-----------|-----------|-------------|-----------|----------------|----------------|---------------------|-------------|
| 6   | GeneID:3010      | <i>HIST1H1T</i>     | 26107640  | 26108364  | rs2237228   | 26104630  | 8.76E-08       | 3.99E-08       | 66.57406268         | 1.19883E-13 |
| 6   | GeneID:4340      | <i>MOG</i>          | 29624758  | 29640149  | rs62392957  | 29649219  | 1.02E-02       | 4.42E-13       | 66.0659722          | 1.53411E-13 |
| 6   | GeneID:100507584 | <i>LOC100507584</i> | 33857288  | 33864684  | rs73744723  | 33857439  | 4.85E-02       | 7.59E-13       | 61.8646257          | 1.17624E-12 |
| 6   | GeneID:353020    | <i>HCG4P11</i>      | 29688955  | 29689944  | rs183103224 | 29690291  | 3.60E-03       | 1.11E-11       | 61.70464633         | 1.27101E-12 |
| 6   | GeneID:6148      | <i>RPL23AP1</i>     | 29694409  | 29694931  | rs183103224 | 29690291  | 3.65E-03       | 1.12E-11       | 61.65489153         | 1.302E-12   |
| 6   | GeneID:3134      | <i>HLA-F</i>        | 29691117  | 29695073  | rs183103224 | 29690291  | 3.65E-03       | 1.12E-11       | 61.65172652         | 1.304E-12   |
| 6   | GeneID:100048907 | <i>ZDHHC20P1</i>    | 29675918  | 29676324  | rs183103224 | 29690291  | 2.97E-03       | 1.71E-11       | 61.22998425         | 1.59945E-12 |
| 6   | GeneID:285830    | <i>HLA-F-AS1</i>    | 29694378  | 29716826  | rs183103224 | 29690291  | 4.70E-03       | 1.45E-11       | 60.6372049          | 2.13108E-12 |
| 6   | GeneID:4280      | <i>MICE</i>         | 29709234  | 29716880  | rs62391801  | 29694443  | 6.49E-03       | 1.33E-11       | 60.1629625          | 2.6809E-12  |
| 10  | GeneID:5654      | <i>HTRA1</i>        | 124221041 | 124274424 | rs2223089   | 124210160 | 2.31E-11       | 2.58E-02       | 56.29528528         | 1.73875E-11 |
| 6   | GeneID:55604     | <i>LRRC16A</i>      | 25279656  | 25620758  | rs927985    | 25412811  | 2.27E-06       | 2.79E-07       | 56.1753489          | 1.84241E-11 |
| 1   | GeneID:10806     | <i>SDCCAG8</i>      | 243419307 | 243663393 | rs12058508  | 243487861 | 2.64E-07       | 3.37E-06       | 55.49623039         | 2.55715E-11 |
| 6   | GeneID:3008      | <i>HIST1H1E</i>     | 26156559  | 26157343  | rs7749823   | 26158079  | 1.47E-04       | 8.96E-08       | 50.10901034         | 3.42649E-10 |
| 1   | GeneID:100422536 | <i>LOC100422536</i> | 243430920 | 243431421 | rs12741781  | 243428152 | 7.80E-06       | 1.99E-06       | 49.77788835         | 4.01775E-10 |
| 6   | GeneID:3122      | <i>HLA-DRA</i>      | 32407619  | 32412823  | rs116479312 | 32408500  | 2.78E-03       | 2.64E-08       | 46.67120197         | 1.78533E-09 |
| 1   | GeneID:100616343 | <i>MIR4677</i>      | 243509478 | 243509557 | rs10926994  | 243500994 | 3.64E-05       | 2.37E-06       | 46.3475843          | 2.08495E-09 |
| 1   | GeneID:9859      | <i>CEP170</i>       | 243287730 | 243418708 | rs12732083  | 243413125 | 1.58E-05       | 6.45E-06       | 46.0192173          | 2.44028E-09 |
| 6   | GeneID:26529     | <i>OR12D2</i>       | 29364416  | 29365448  | rs3128852   | 29364135  | 4.93E-04       | 3.57E-07       | 44.91752903         | 4.13607E-09 |
| 6   | GeneID:7407      | <i>VARS</i>         | 31745295  | 31763712  | rs2075800   | 31777946  | 4.51E-02       | 4.70E-08       | 39.94372986         | 4.44597E-08 |
| 14  | GeneID:1531      | <i>CYB5AP3</i>      | 93604300  | 93605122  | rs28540738  | 93591673  | 6.93E-06       | 6.40E-04       | 38.46723329         | 8.9747E-08  |
| 6   | GeneID:100189411 | <i>TRNAA41</i>      | 26705606  | 26705678  | rs2451729   | 26705859  | 4.93E-06       | 2.74E-03       | 36.23995463         | 2.58274E-07 |
| 6   | GeneID:100189303 | <i>TRNAM16</i>      | 26701712  | 26701784  | rs2451729   | 26705859  | 5.23E-06       | 2.90E-03       | 36.00544802         | 2.88624E-07 |
| 6   | GeneID:100189128 | <i>TRNAA18</i>      | 26687485  | 26687557  | rs9467835   | 26678512  | 7.11E-06       | 2.46E-03       | 35.72356653         | 3.29844E-07 |
| 6   | GeneID:100533655 | <i>LOC100533655</i> | 25218937  | 25221396  | rs76798435  | 25231495  | 4.62E-04       | 4.33E-05       | 35.45727665         | 3.74159E-07 |
| 6   | GeneID:100130756 | <i>UQCRHP1</i>      | 31578860  | 31579133  | rs2736188   | 31565648  | 1.07E-02       | 1.95E-06       | 35.36077443         | 3.91644E-07 |
| 14  | GeneID:3705      | <i>ITPK1</i>        | 93403259  | 93582263  | rs28540738  | 93591673  | 2.32E-05       | 9.18E-04       | 35.33010644         | 3.97369E-07 |
| 6   | GeneID:100420841 | <i>LOC100420841</i> | 25248417  | 25249008  | rs183779130 | 25244395  | 3.69E-04       | 8.26E-05       | 34.61250007         | 5.57944E-07 |
| Chr | Gene.id          | Name                | Start     | End       | SNP.id      | SNP.pos   | pval(headache) | pval(hyperPAN) | X <sup>2</sup> ,4df | FCP         |

|    |                  |                     |          |          |             |          |          |          |             |             |
|----|------------------|---------------------|----------|----------|-------------|----------|----------|----------|-------------|-------------|
| 6  | GeneID:394263    | <i>MUC21</i>        | 30951485 | 30957675 | rs141725002 | 30971976 | 1.79E-02 | 1.86E-06 | 34.44155902 | 6.04891E-07 |
| 6  | GeneID:645452    | <i>RPL21P68</i>     | 25261427 | 25261986 | rs138739848 | 25250492 | 4.38E-04 | 8.01E-05 | 34.33318008 | 6.36675E-07 |
| 13 | GeneID:23143     | <i>LRCH1</i>        | 47127296 | 47327176 | rs7318686   | 47200504 | 1.09E-05 | 3.33E-03 | 34.26130427 | 6.58667E-07 |
| 6  | GeneID:3139      | <i>HLA-L</i>        | 30227339 | 30234728 | rs188226252 | 30236078 | 2.40E-02 | 1.67E-06 | 34.06196691 | 7.23698E-07 |
| 8  | GeneID:100420053 | <i>LOC100420053</i> | 10194293 | 10195166 | rs7818437   | 10209623 | 2.36E-06 | 2.20E-02 | 33.54128818 | 9.25348E-07 |
| 8  | GeneID:640       | <i>BLK</i>          | 11351521 | 11422108 | rs12549150  | 11422936 | 1.65E-05 | 3.51E-03 | 33.32911006 | 1.02277E-06 |
| 6  | GeneID:100420530 | <i>LOC100420530</i> | 30931992 | 30933937 | rs143764990 | 30943138 | 2.56E-02 | 2.30E-06 | 33.29265977 | 1.04051E-06 |
| 20 | GeneID:140688    | <i>C20orf112</i>    | 31030862 | 31071288 | rs1555132   | 31046567 | 1.85E-06 | 3.29E-02 | 33.22493658 | 1.07428E-06 |
| 6  | GeneID:100500885 | <i>MIR3925</i>      | 36590213 | 36590289 | rs149829367 | 36580284 | 1.33E-04 | 4.73E-04 | 33.15946684 | 1.10796E-06 |
| 6  | GeneID:100379658 | <i>RNY5P5</i>       | 25192641 | 25192714 | rs77042011  | 25204583 | 2.26E-03 | 3.22E-05 | 32.8687033  | 1.27074E-06 |
| 6  | GeneID:221527    | <i>ZBTB12</i>       | 31867394 | 31869769 | rs115062572 | 31862876 | 1.46E-02 | 5.00E-06 | 32.86586676 | 1.27244E-06 |
| 6  | GeneID:404024    | <i>TRIM26P1</i>     | 30206078 | 30210056 | rs191662147 | 30211196 | 2.79E-02 | 2.85E-06 | 32.69654586 | 1.37813E-06 |

Chr, chromosome number; Gene.id, Gene ID; Name, Gene; Start, start point of the gene; End, end point of the gene; SNP.id, top SNP associated with the gene; SNP.pos, position of the top SNP; pval(headache), p-value of the gene in headache dataset; pval(hyperPAN), p-value of the gene in hyperthyroidism dataset.

**Supplementary Table S12.** Genes overlapping headache and secondary hypothyroidism at  $p < 0.05$  and Fisher combined p-value ( $p_{\text{FCP}} < 2.09 \times 10^{-6}$ ).

| Chr | Gene.id       | Name            | Start    | End      | SNP.id      | SNP.pos  | pval(headache) | pval(sechypoPAN) | X <sup>2</sup> ,4df | FCP         |
|-----|---------------|-----------------|----------|----------|-------------|----------|----------------|------------------|---------------------|-------------|
| 17  | GeneID:284058 | <i>KIAA1267</i> | 44107282 | 44302740 | rs111535660 | 44314148 | 1.71E-15       | 3.47E-02         | 74.72508151         | 2.27804E-15 |
| 17  | GeneID:9884   | <i>LRRC37A</i>  | 44372497 | 44415160 | rs2458218   | 44361383 | 6.20E-15       | 1.36E-02         | 74.0270603          | 3.20012E-15 |
| 17  | GeneID:4905   | <i>NSF</i>      | 44668035 | 44834830 | rs1378358   | 44787312 | 1.04E-13       | 4.00E-02         | 66.22404232         | 1.42082E-13 |
| 17  | GeneID:201176 | <i>ARHGAP27</i> | 43471268 | 43510282 | rs35489312  | 43517252 | 1.77E-13       | 4.47E-02         | 64.9432055          | 2.64508E-13 |
| 6   | GeneID:80740  | <i>LY6G6C</i>   | 31686425 | 31689510 | rs3131383   | 31704294 | 1.48E-07       | 1.73E-07         | 62.5971             | 8.24889E-13 |
| 6   | GeneID:80739  | <i>C6orf25</i>  | 31691121 | 31694487 | rs3101018   | 31705864 | 1.77E-07       | 2.80E-07         | 61.26969362         | 1.56899E-12 |
| 6   | GeneID:23564  | <i>DDAH2</i>    | 31694817 | 31698039 | rs3132445   | 31712196 | 2.03E-07       | 3.23E-07         | 60.70621861         | 2.06107E-12 |
| 6   | GeneID:401251 | <i>C6orf26</i>  | 31730773 | 31732627 | rs3130484   | 31715882 | 2.01E-07       | 3.42E-07         | 60.61556497         | 2.15352E-12 |
| 6   | GeneID:80737  | <i>C6orf27</i>  | 31733371 | 31745108 | rs3117573   | 31718396 | 2.15E-07       | 3.45E-07         | 60.46501182         | 2.31631E-12 |
| 6   | GeneID:1192   | <i>CLIC1</i>    | 31698358 | 31704341 | rs3130484   | 31715882 | 2.25E-07       | 3.83E-07         | 60.17115344         | 2.67029E-12 |
| Chr | Gene.id       | Name            | Start    | End      | SNP.id      | SNP.pos  | pval(headache) | pval(sechypoPAN) | X <sup>2</sup> ,4df | FCP         |

| 6   | GeneID:721       | <i>C4B</i>             | 31982572  | 32003195  | rs433061   | 32014828  | 1.16E-07       | 1.05E-06         | 59.46533749         | 3.75722E-12 |
|-----|------------------|------------------------|-----------|-----------|------------|-----------|----------------|------------------|---------------------|-------------|
| 6   | GeneID:100532732 | <i>MSH5-C6orf26</i>    | 31707725  | 31732627  | rs3130484  | 31715882  | 3.09E-07       | 5.27E-07         | 58.89134467         | 4.95944E-12 |
| 6   | GeneID:259197    | <i>NCR3</i>            | 31556660  | 31560762  | rs1800628  | 31546850  | 1.79E-07       | 9.75E-07         | 58.75257794         | 5.30365E-12 |
| 6   | GeneID:7124      | <i>TNF</i>             | 31543350  | 31546112  | rs1800628  | 31546850  | 1.86E-07       | 1.01E-06         | 58.61139593         | 5.67834E-12 |
| 6   | GeneID:4758      | <i>NEU1</i>            | 31826829  | 31830709  | rs501942   | 31840477  | 5.11E-07       | 3.83E-07         | 58.5217947          | 5.92974E-12 |
| 6   | GeneID:7940      | <i>LST1</i>            | 31553956  | 31556686  | rs1800628  | 31546850  | 1.90E-07       | 1.03E-06         | 58.51628037         | 5.94557E-12 |
| 6   | GeneID:4050      | <i>LTB</i>             | 31548335  | 31550202  | rs1800628  | 31546850  | 1.92E-07       | 1.04E-06         | 58.48373489         | 6.03986E-12 |
| 6   | GeneID:80736     | <i>SLC44A4</i>         | 31830969  | 31846823  | rs501942   | 31840477  | 4.53E-07       | 5.18E-07         | 58.1611697          | 7.05909E-12 |
| 6   | GeneID:10919     | <i>EHMT2</i>           | 31847536  | 31865464  | rs501942   | 31840477  | 4.78E-07       | 5.46E-07         | 57.95096874         | 7.814E-12   |
| 6   | GeneID:100302242 | <i>MIR1236</i>         | 31924616  | 31924717  | rs1270942  | 31918860  | 1.43E-07       | 1.91E-06         | 57.85771558         | 8.17423E-12 |
| 6   | GeneID:1589      | <i>CYP21A2</i>         | 32006093  | 32009447  | rs433061   | 32014828  | 1.77E-07       | 1.61E-06         | 57.77062788         | 8.52561E-12 |
| 6   | GeneID:7936      | <i>RDBP</i>            | 31919864  | 31926864  | rs1270942  | 31918860  | 1.48E-07       | 1.98E-06         | 57.71630901         | 8.75237E-12 |
| 6   | GeneID:6499      | <i>SKIV2L</i>          | 31926581  | 31937532  | rs1270942  | 31918860  | 1.75E-07       | 2.34E-06         | 57.04567608         | 1.21017E-11 |
| 6   | GeneID:4049      | <i>LTA</i>             | 31539876  | 31542098  | rs1800628  | 31546850  | 1.76E-07       | 2.34E-06         | 57.03614527         | 1.21576E-11 |
| 6   | GeneID:629       | <i>CFB</i>             | 31913721  | 31919861  | rs1270942  | 31918860  | 1.76E-07       | 2.35E-06         | 57.02283419         | 1.2236E-11  |
| 6   | GeneID:1388      | <i>ATF6B</i>           | 32083045  | 32096017  | rs1269852  | 32080191  | 1.64E-07       | 2.67E-06         | 56.91287667         | 1.29035E-11 |
| 6   | GeneID:5491      | <i>PPIAP9</i>          | 31486754  | 31488108  | rs3130614  | 31476458  | 2.59E-07       | 3.08E-06         | 55.71192029         | 2.30434E-11 |
| 6   | GeneID:100287329 | <i>LOC100287329</i>    | 31527348  | 31540474  | rs1800628  | 31546850  | 2.48E-07       | 3.30E-06         | 55.66257193         | 2.35988E-11 |
| 6   | GeneID:717       | <i>C2</i>              | 31868776  | 31913449  | rs1270942  | 31918860  | 2.79E-07       | 3.02E-06         | 55.60217351         | 2.42969E-11 |
| 6   | GeneID:7148      | <i>TNXB</i>            | 32008932  | 32077151  | rs1269852  | 32080191  | 3.04E-07       | 3.63E-06         | 55.06531805         | 3.14819E-11 |
| 6   | GeneID:4277      | <i>MICB</i>            | 31465855  | 31478901  | rs3130614  | 31476458  | 4.11E-07       | 4.90E-06         | 53.85957951         | 5.6313E-11  |
| 6   | GeneID:692233    | <i>SNORD117</i>        | 31504151  | 31504226  | rs9267488  | 31514247  | 6.99E-07       | 3.03E-06         | 53.76008652         | 5.90798E-11 |
| 6   | GeneID:692199    | <i>SNORD84</i>         | 31508878  | 31508955  | rs9267488  | 31514247  | 8.34E-07       | 3.62E-06         | 53.05323501         | 8.30595E-11 |
| 6   | GeneID:534       | <i>ATP6V1G2</i>        | 31512228  | 31514625  | rs9267488  | 31514247  | 8.95E-07       | 3.88E-06         | 52.77037277         | 9.51864E-11 |
| 6   | GeneID:100532737 | <i>ATP6V1G2-DDX39B</i> | 31497996  | 31514625  | rs9267488  | 31514247  | 1.00E-06       | 4.34E-06         | 52.32312082         | 1.18068E-10 |
| 6   | GeneID:4795      | <i>NFKBIL1</i>         | 31514628  | 31526606  | rs9267488  | 31514247  | 1.10E-06       | 4.76E-06         | 51.95147438         | 1.41206E-10 |
| 1   | GeneID:79630     | <i>C1orf54</i>         | 150245183 | 150253335 | rs12740679 | 150262270 | 2.46E-10       | 4.79E-02         | 50.32890257         | 3.08269E-10 |
| 6   | GeneID:3106      | <i>HLA-B</i>           | 31321649  | 31324989  | rs2523593  | 31326703  | 1.14E-06       | 2.11E-05         | 48.89924553         | 6.12837E-10 |
| Chr | Gene.id          | Name                   | Start     | End       | SNP.id     | SNP.pos   | pval(headache) | pval(sechypoPAN) | X <sup>2</sup> ,4df | FCP         |



| 6   | GeneID:729816    | <i>DHFRP2</i>       | 31331244 | 31334742 | rs2523593   | 31326703 | 1.22E-06       | 2.25E-05         | 48.64670798         | 6.91867E-10 |
|-----|------------------|---------------------|----------|----------|-------------|----------|----------------|------------------|---------------------|-------------|
| 6   | GeneID:100131609 | <i>HNRNPA1P2</i>    | 32293175 | 32294298 | rs116667074 | 32285362 | 7.28E-06       | 4.40E-06         | 48.32764475         | 8.06421E-10 |
| 6   | GeneID:29113     | <i>C6orf15</i>      | 31079000 | 31080332 | rs2233980   | 31079644 | 9.56E-07       | 7.97E-05         | 46.59576464         | 1.85109E-09 |
| 6   | GeneID:1041      | <i>CDSN</i>         | 31082865 | 31088252 | rs2233980   | 31079644 | 1.09E-06       | 9.12E-05         | 46.05606529         | 2.39757E-09 |
| 6   | GeneID:10665     | <i>C6orf10</i>      | 32260475 | 32339656 | rs116667074 | 32285362 | 1.46E-05       | 8.85E-06         | 45.53315264         | 3.08012E-09 |
| 6   | GeneID:170679    | <i>PSORS1C1</i>     | 31082608 | 31107869 | rs2233980   | 31079644 | 1.44E-06       | 1.20E-04         | 44.96212214         | 4.04871E-09 |
| 6   | GeneID:6890      | <i>TAP1</i>         | 32812986 | 32821748 | rs45506201  | 32808299 | 9.10E-06       | 2.41E-05         | 44.48373359         | 5.09039E-09 |
| 6   | GeneID:100507463 | <i>LOC100507463</i> | 32811863 | 32814277 | rs45506201  | 32808299 | 9.66E-06       | 2.55E-05         | 44.24613576         | 5.70321E-09 |
| 6   | GeneID:5696      | <i>PSMB8</i>        | 32808494 | 32812712 | rs45506201  | 32808299 | 1.03E-05       | 2.74E-05         | 43.9705589          | 6.50675E-09 |
| 6   | GeneID:100507444 | <i>PPP1R2P1</i>     | 32844255 | 32847851 | rs115591082 | 32844103 | 5.24E-06       | 6.14E-05         | 43.71346139         | 7.35795E-09 |
| 6   | GeneID:3119      | <i>HLA-DQB1</i>     | 32627657 | 32634466 | rs1130389   | 32632627 | 1.09E-05       | 3.08E-05         | 43.62341611         | 7.68163E-09 |
| 6   | GeneID:170680    | <i>PSORS1C2</i>     | 31105311 | 31107127 | rs3130557   | 31094703 | 2.78E-06       | 1.38E-04         | 43.36371705         | 8.69695E-09 |
| 6   | GeneID:6891      | <i>TAP2</i>         | 32789610 | 32806547 | rs45506201  | 32808299 | 1.35E-05       | 3.57E-05         | 42.90182117         | 1.08448E-08 |
| 6   | GeneID:5698      | <i>PSMB9</i>        | 32821938 | 32827628 | rs45506201  | 32808299 | 5.28E-06       | 9.67E-05         | 42.79200331         | 1.14289E-08 |
| 6   | GeneID:54535     | <i>CCHCR1</i>       | 31110216 | 31126015 | rs3132541   | 31098734 | 4.22E-06       | 1.36E-04         | 42.55210546         | 1.28164E-08 |
| 3   | GeneID:100506815 | <i>FOXP1-IT1</i>    | 71619425 | 71623608 | rs62244889  | 71609007 | 1.04E-05       | 6.00E-05         | 42.39759297         | 1.37978E-08 |
| 6   | GeneID:3117      | <i>HLA-DQA1</i>     | 32605183 | 32611429 | rs9272729   | 32609594 | 4.50E-05       | 3.70E-05         | 40.42936436         | 3.52786E-08 |
| 15  | GeneID:9728      | <i>SECISBP2L</i>    | 49280835 | 49338760 | rs7183756   | 49307027 | 6.84E-05       | 2.84E-05         | 40.11933362         | 4.0893E-08  |
| 6   | GeneID:3127      | <i>HLA-DRB5</i>     | 32485151 | 32498006 | rs115250958 | 32509842 | 3.77E-05       | 5.84E-05         | 39.86610885         | 4.61336E-08 |
| 6   | GeneID:3128      | <i>HLA-DRB6</i>     | 32520490 | 32527779 | rs115250958 | 32509842 | 3.81E-05       | 5.91E-05         | 39.8226597          | 4.70978E-08 |
| 6   | GeneID:100129192 | <i>MICC</i>         | 30382490 | 30387543 | rs149543464 | 30400763 | 2.63E-07       | 1.01E-02         | 39.49344184         | 5.50881E-08 |
| 3   | GeneID:27086     | <i>FOXP1</i>        | 71004736 | 71633140 | rs7610856   | 71579022 | 5.40E-06       | 7.01E-04         | 38.78409886         | 7.71971E-08 |
| 15  | GeneID:2252      | <i>FGF7</i>         | 49715375 | 49779523 | rs16962486  | 49743582 | 4.06E-03       | 2.25E-06         | 37.02335924         | 1.78145E-07 |
| 4   | GeneID:4299      | <i>AFF1</i>         | 87856154 | 88062206 | rs342458    | 88060025 | 3.17E-07       | 4.26E-02         | 36.24127135         | 2.58113E-07 |
| 17  | GeneID:6155      | <i>RPL27</i>        | 41150446 | 41154976 | rs2089858   | 41156153 | 2.73E-06       | 1.36E-02         | 34.21224471         | 6.7411E-07  |
| 10  | GeneID:100616320 | <i>MIR4481</i>      | 12695137 | 12695196 | rs7072694   | 12692577 | 1.08E-05       | 3.62E-03         | 34.11471312         | 7.05892E-07 |
| 17  | GeneID:146923    | <i>RUNDC1</i>       | 41132582 | 41145707 | rs2089858   | 41156153 | 3.12E-06       | 1.52E-02         | 33.73277974         | 8.45389E-07 |
| 15  | GeneID:196951    | <i>C15orf33</i>     | 49620590 | 49913118 | rs16962486  | 49743582 | 8.57E-03       | 5.55E-06         | 33.72073259         | 8.5021E-07  |
| Chr | Gene.id          | Name                | Start    | End      | SNP.id      | SNP.pos  | pval(headache) | pval(sechypoPAN) | X <sup>2</sup> ,4df | FCP         |

|    |                  |                     |           |           |            |           |          |          |             |             |
|----|------------------|---------------------|-----------|-----------|------------|-----------|----------|----------|-------------|-------------|
| 15 | GeneID:9318      | <i>COPS2</i>        | 49417471  | 49447854  | rs12439497 | 49406214  | 2.00E-03 | 2.39E-05 | 33.71164819 | 8.53864E-07 |
| 6  | GeneID:352996    | <i>P5-04</i>        | 29910314  | 29910426  | rs2524005  | 29899677  | 3.23E-04 | 1.62E-04 | 33.53630311 | 9.27527E-07 |
| 6  | GeneID:3105      | <i>HLA-A</i>        | 29910247  | 29913661  | rs2524005  | 29899677  | 3.23E-04 | 1.62E-04 | 33.53171296 | 9.29538E-07 |
| 6  | GeneID:352994    | <i>P5-05</i>        | 29894219  | 29894350  | rs2524005  | 29899677  | 3.24E-04 | 1.62E-04 | 33.52185146 | 9.33873E-07 |
| 20 | GeneID:284804    | <i>LOC284804</i>    | 31136309  | 31173628  | rs6058750  | 31177986  | 3.45E-06 | 1.53E-02 | 33.51135246 | 9.38511E-07 |
| 6  | GeneID:80868     | <i>HCG4B</i>        | 29892369  | 29893428  | rs2524005  | 29899677  | 3.31E-04 | 1.66E-04 | 33.43076154 | 9.74884E-07 |
| 6  | GeneID:3138      | <i>HLA-K</i>        | 29894436  | 29897616  | rs2524005  | 29899677  | 3.34E-04 | 1.67E-04 | 33.40071383 | 9.88802E-07 |
| 6  | GeneID:353003    | <i>HCG4P5</i>       | 29908689  | 29909578  | rs2524005  | 29899677  | 3.36E-04 | 1.69E-04 | 33.36972627 | 1.00336E-06 |
| 6  | GeneID:352965    | <i>HLA-U</i>        | 29901541  | 29902657  | rs2524005  | 29899677  | 3.42E-04 | 1.71E-04 | 33.30437719 | 1.03477E-06 |
| 6  | GeneID:352995    | <i>P5.8</i>         | 29903015  | 29904157  | rs2524005  | 29899677  | 3.59E-04 | 1.80E-04 | 33.10892393 | 1.13469E-06 |
| 15 | GeneID:735247    | <i>LOC735247</i>    | 49657062  | 49659024  | rs8034661  | 49646799  | 6.74E-03 | 1.11E-05 | 32.8118833  | 1.30523E-06 |
| 15 | GeneID:100420615 | <i>LOC100420615</i> | 49657122  | 49659024  | rs8034661  | 49646799  | 6.74E-03 | 1.11E-05 | 32.8118833  | 1.30523E-06 |
| 1  | GeneID:51107     | <i>APH1A</i>        | 150237799 | 150241532 | rs10157197 | 150250636 | 2.05E-06 | 3.72E-02 | 32.78310192 | 1.32306E-06 |
| 1  | GeneID:23632     | <i>CA14</i>         | 150230218 | 150237478 | rs10157197 | 150250636 | 2.36E-06 | 4.29E-02 | 32.21430387 | 1.72954E-06 |

Chr, chromosome number; Gene.id, Gene ID; Name, Gene; Start, start point of the gene; End, end point of the gene; SNP.id, top SNP associated with the gene; SNP.pos, position of the top SNP; pval(headache), p-value of the gene in headache dataset; pval(sechypoPAN), p-value of the gene in secondary hypothyroidism dataset.

**Supplementary Table S13.** Genes overlapping headache and TSH at  $p < 0.05$  and Fisher combined p-value ( $p_{\text{FCP}} < 2.09 \times 10^{-6}$ ).

| Chr | Gene.id          | Name                | Start     | End       | SNP.id     | SNP.pos   | pval(headache) | pval(TSH) | X <sup>2</sup> ,4df | FCP         |
|-----|------------------|---------------------|-----------|-----------|------------|-----------|----------------|-----------|---------------------|-------------|
| 6   | GeneID:10846     | <i>PDE10A</i>       | 165740778 | 166075584 | rs73786673 | 166033316 | 3.29E-02       | 2.46E-50  | 235.2866071         | 9.60297E-50 |
| 15  | GeneID:2252      | <i>FGF7</i>         | 49715375  | 49779523  | rs16962486 | 49743582  | 2.83E-03       | 1.12E-31  | 154.2660384         | 2.47965E-32 |
| 15  | GeneID:196951    | <i>C15orf33</i>     | 49620590  | 49913118  | rs16962486 | 49743582  | 5.93E-03       | 2.74E-31  | 150.9993818         | 1.24326E-31 |
| 15  | GeneID:9728      | <i>SECISBP2L</i>    | 49280835  | 49338760  | rs7183756  | 49307027  | 4.67E-05       | 5.37E-22  | 117.8977981         | 1.50176E-24 |
| 15  | GeneID:729344    | <i>KRT8P24</i>      | 49263922  | 49265761  | rs4775791  | 49278326  | 3.78E-04       | 2.05E-20  | 106.4323048         | 4.19418E-22 |
| 15  | GeneID:735247    | <i>LOC735247</i>    | 49657062  | 49659024  | rs8034661  | 49646799  | 5.14E-03       | 2.82E-21  | 105.1735668         | 7.77871E-22 |
| 15  | GeneID:100420615 | <i>LOC100420615</i> | 49657122  | 49659024  | rs8034661  | 49646799  | 5.14E-03       | 2.82E-21  | 105.1735668         | 7.77871E-22 |
| 15  | GeneID:9318      | <i>COPS2</i>        | 49417471  | 49447854  | rs12439497 | 49406214  | 1.39E-03       | 1.16E-20  | 104.9546273         | 8.66088E-22 |
| Chr | Gene.id          | Name                | Start     | End       | SNP.id     | SNP.pos   | pval(headache) | pval(TSH) | X <sup>2</sup> ,4df | FCP         |

| 15  | GeneID:56986     | <i>DTWD1</i>        | 49913226  | 49937333  | rs56057624  | 49922325  | 1.01E-02       | 1.66E-21  | 104.8882701         | 8.9475E-22  |
|-----|------------------|---------------------|-----------|-----------|-------------|-----------|----------------|-----------|---------------------|-------------|
| 15  | GeneID:100131797 | <i>RPL15P19</i>     | 49469498  | 49470980  | rs34854443  | 49475296  | 3.95E-03       | 4.36E-21  | 104.8304929         | 9.20477E-22 |
| 15  | GeneID:100616332 | <i>MIR4716</i>      | 49461267  | 49461350  | rs34854443  | 49475296  | 3.14E-03       | 6.44E-21  | 104.5126072         | 1.07584E-21 |
| 15  | GeneID:100306975 | <i>LOC100306975</i> | 49448495  | 49450822  | rs563533    | 49465581  | 3.82E-03       | 6.56E-21  | 104.081803          | 1.32903E-21 |
| 15  | GeneID:2585      | <i>GALK2</i>        | 49447976  | 49622002  | rs11631782  | 49542284  | 4.03E-03       | 8.40E-21  | 103.4783903         | 1.78684E-21 |
| 17  | GeneID:644315    | <i>RPS7P11</i>      | 44798914  | 44799606  | rs1378358   | 44787312  | 1.83E-14       | 8.36E-09  | 100.4670426         | 7.82372E-21 |
| 17  | GeneID:4905      | <i>NSF</i>          | 44668035  | 44834830  | rs1378358   | 44787312  | 3.50E-14       | 9.98E-09  | 98.81355071         | 1.75954E-20 |
| 11  | GeneID:56981     | <i>PRDM11</i>       | 45115564  | 45246903  | rs78469981  | 45185735  | 2.08E-02       | 2.34E-20  | 98.14788749         | 2.4382E-20  |
| 14  | GeneID:3705      | <i>ITPK1</i>        | 93403259  | 93582263  | rs28540738  | 93591673  | 1.84E-05       | 3.97E-16  | 92.72876498         | 3.46463E-19 |
| 17  | GeneID:401884    | <i>MGC57346</i>     | 43697712  | 43715329  | rs117368197 | 43715924  | 1.24E-16       | 6.56E-05  | 92.51092741         | 3.85442E-19 |
| 17  | GeneID:147081    | <i>C17orf69</i>     | 43716341  | 43723595  | rs117368197 | 43715924  | 1.24E-16       | 6.56E-05  | 92.51092741         | 3.85442E-19 |
| 17  | GeneID:246744    | <i>STH</i>          | 44076616  | 44077060  | rs112572874 | 44072984  | 1.62E-16       | 7.01E-05  | 91.85464391         | 5.31427E-19 |
| 17  | GeneID:100130148 | <i>LOC100130148</i> | 43973149  | 43976164  | rs112275277 | 43981958  | 2.87E-16       | 4.46E-05  | 91.61190421         | 5.98451E-19 |
| 17  | GeneID:4137      | <i>MAPT</i>         | 43971748  | 44105700  | rs62062277  | 44093753  | 2.43E-16       | 8.77E-05  | 90.59345123         | 9.84991E-19 |
| 17  | GeneID:284058    | <i>KIAA1267</i>     | 44107282  | 44302740  | rs62062277  | 44093753  | 2.24E-16       | 9.99E-05  | 90.49243741         | 1.03489E-18 |
| 17  | GeneID:7473      | <i>WNT3</i>         | 44841686  | 44896082  | rs199533    | 44828931  | 3.93E-13       | 7.19E-08  | 90.02686982         | 1.29957E-18 |
| 17  | GeneID:100128977 | <i>LOC100128977</i> | 43920722  | 43972879  | rs112275277 | 43981958  | 9.85E-16       | 5.78E-05  | 88.62489673         | 2.57968E-18 |
| 17  | GeneID:162540    | <i>IMP5</i>         | 43922256  | 43924438  | rs878888    | 43912635  | 1.34E-15       | 4.94E-05  | 88.32273922         | 2.99039E-18 |
| 17  | GeneID:1394      | <i>CRHR1</i>        | 43697710  | 43913194  | rs111273167 | 43740967  | 2.27E-15       | 3.26E-05  | 88.10222892         | 3.33081E-18 |
| 17  | GeneID:100423004 | <i>MIR4315-1</i>    | 43552729  | 43552801  | rs148269941 | 43540472  | 5.42E-15       | 6.95E-05  | 84.84560381         | 1.6358E-17  |
| 17  | GeneID:9842      | <i>PLEKHM1</i>      | 43513266  | 43568146  | rs148269941 | 43540472  | 1.11E-14       | 9.57E-05  | 82.76513729         | 4.51821E-17 |
| 14  | GeneID:1531      | <i>CYB5AP3</i>      | 93604300  | 93605122  | rs28540738  | 93591673  | 5.50E-06       | 3.62E-13  | 81.51247718         | 8.32745E-17 |
| 17  | GeneID:201176    | <i>ARHGAP27</i>     | 43471268  | 43510282  | rs35489312  | 43517252  | 3.11E-14       | 1.37E-04  | 79.9938864          | 1.74703E-16 |
| 11  | GeneID:57586     | <i>SYT13</i>        | 45261853  | 45307884  | rs11038372  | 45282994  | 1.51E-02       | 2.79E-13  | 66.19976244         | 1.43766E-13 |
| 10  | GeneID:387715    | <i>ARMS2</i>        | 124214179 | 124216868 | rs78438709  | 124201071 | 2.71E-12       | 3.27E-02  | 60.10353999         | 2.75911E-12 |
| 6   | GeneID:29113     | <i>C6orf15</i>      | 31079000  | 31080332  | rs2233980   | 31079644  | 7.86E-07       | 3.54E-07  | 57.82184213         | 8.31718E-12 |
| 6   | GeneID:1041      | <i>CDSN</i>         | 31082865  | 31088252  | rs2233980   | 31079644  | 9.39E-07       | 4.22E-07  | 57.11250931         | 1.17172E-11 |
| 6   | GeneID:170679    | <i>PSORS1C1</i>     | 31082608  | 31107869  | rs2233980   | 31079644  | 1.22E-06       | 5.50E-07  | 56.05473385         | 1.95289E-11 |
| Chr | Gene.id          | Name                | Start     | End       | SNP.id      | SNP.pos   | pval(headache) | pval(TSH) | X <sup>2</sup> ,4df | FCP         |

| 6   | GeneID:170680    | <i>PSORS1C2</i>     | 31105311  | 31107127  | rs3130557   | 31094703  | 2.47E-06       | 8.22E-07  | 53.84210065         | 5.67895E-11 |
|-----|------------------|---------------------|-----------|-----------|-------------|-----------|----------------|-----------|---------------------|-------------|
| 11  | GeneID:219541    | <i>MED19</i>        | 57471186  | 57479673  | rs143262971 | 57468415  | 1.04E-09       | 3.10E-03  | 52.9209336          | 8.85265E-11 |
| 6   | GeneID:54535     | <i>CCHCR1</i>       | 31110216  | 31126015  | rs3132541   | 31098734  | 3.43E-06       | 1.15E-06  | 52.51968354         | 1.07404E-10 |
| 11  | GeneID:25921     | <i>ZDHHC5</i>       | 57435474  | 57468659  | rs143262971 | 57468415  | 1.72E-09       | 3.24E-03  | 51.8183309          | 1.50554E-10 |
| 15  | GeneID:399694    | <i>SHC4</i>         | 49115934  | 49255641  | rs12906122  | 49257201  | 2.25E-03       | 3.42E-09  | 51.18503707         | 2.04207E-10 |
| 9   | GeneID:100128505 | <i>LOC100128505</i> | 119266562 | 119324572 | rs6478241   | 119252629 | 1.27E-09       | 1.18E-02  | 49.83221558         | 3.91419E-10 |
| 10  | GeneID:338591    | <i>LOC338591</i>    | 8661896   | 8662573   | rs72777033  | 8652323   | 7.55E-04       | 2.04E-08  | 49.78789064         | 3.99848E-10 |
| 11  | GeneID:100528016 | <i>TMX2-CTNND1</i>  | 57479995  | 57586652  | rs143262971 | 57468415  | 2.73E-09       | 5.85E-03  | 49.7234332          | 4.12431E-10 |
| 6   | GeneID:3107      | <i>HLA-C</i>        | 31236529  | 31239855  | rs2524107   | 31232590  | 2.21E-02       | 2.55E-09  | 47.19468559         | 1.38897E-09 |
| 6   | GeneID:80740     | <i>LY6G6C</i>       | 31686425  | 31689510  | rs3131383   | 31704294  | 3.74E-08       | 1.66E-03  | 47.00821377         | 1.51892E-09 |
| 6   | GeneID:23564     | <i>DDAH2</i>        | 31694817  | 31698039  | rs3132445   | 31712196  | 1.05E-07       | 7.98E-04  | 46.4115346          | 2.022E-09   |
| 9   | GeneID:169792    | <i>GLIS3</i>        | 3824128   | 4300035   | rs118047658 | 3860001   | 2.60E-02       | 3.38E-09  | 46.31381309         | 2.11897E-09 |
| 6   | GeneID:1192      | <i>CLIC1</i>        | 31698358  | 31704341  | rs3130484   | 31715882  | 1.12E-07       | 9.50E-04  | 45.92913501         | 2.54791E-09 |
| 6   | GeneID:80739     | <i>C6orf25</i>      | 31691121  | 31694487  | rs3101018   | 31705864  | 8.54E-08       | 2.15E-03  | 44.83529681         | 4.30212E-09 |
| 6   | GeneID:80737     | <i>C6orf27</i>      | 31733371  | 31745108  | rs3117573   | 31718396  | 1.32E-07       | 1.47E-03  | 44.72357438         | 4.53843E-09 |
| 6   | GeneID:401251    | <i>C6orf26</i>      | 31730773  | 31732627  | rs3130484   | 31715882  | 1.31E-07       | 1.56E-03  | 44.61912007         | 4.77106E-09 |
| 6   | GeneID:100532732 | <i>MSH5-C6orf26</i> | 31707725  | 31732627  | rs3130484   | 31715882  | 1.72E-07       | 1.46E-03  | 44.21348139         | 5.793E-09   |
| 6   | GeneID:100419608 | <i>LOC100419608</i> | 28083427  | 28083998  | rs66886492  | 28089731  | 1.52E-08       | 2.45E-02  | 43.41856723         | 8.47191E-09 |
| 17  | GeneID:113026    | <i>PLCD3</i>        | 43189008  | 43209891  | rs58219619  | 43207624  | 7.54E-05       | 4.96E-06  | 43.4131621          | 8.49383E-09 |
| 6   | GeneID:221584    | <i>ZSCAN12P1</i>    | 28058929  | 28063493  | rs35952432  | 28074901  | 2.42E-08       | 1.68E-02  | 43.25353044         | 9.16722E-09 |
| 6   | GeneID:7746      | <i>ZNF193</i>       | 28193029  | 28201265  | rs17720293  | 28214698  | 1.49E-08       | 3.48E-02  | 42.76912811         | 1.15545E-08 |
| 6   | GeneID:80345     | <i>ZSCAN16</i>      | 28092387  | 28097857  | rs66886492  | 28089731  | 2.04E-08       | 2.69E-02  | 42.65281655         | 1.22145E-08 |
| 6   | GeneID:629       | <i>CFB</i>          | 31913721  | 31919861  | rs1270942   | 31918860  | 1.05E-07       | 5.41E-03  | 42.56882644         | 1.27145E-08 |
| 6   | GeneID:100129195 | <i>LOC100129195</i> | 28058336  | 28105071  | rs35749575  | 28114818  | 2.49E-08       | 2.32E-02  | 42.54234545         | 1.28763E-08 |
| 6   | GeneID:100302242 | <i>MIR1236</i>      | 31924616  | 31924717  | rs1270942   | 31918860  | 8.76E-08       | 6.70E-03  | 42.51331449         | 1.3056E-08  |
| 1   | GeneID:100418820 | <i>PHBP12</i>       | 51246012  | 51246821  | rs1416685   | 51243374  | 8.72E-05       | 7.00E-06  | 42.43247839         | 1.35698E-08 |
| 6   | GeneID:717       | <i>C2</i>           | 31868776  | 31913449  | rs1270942   | 31918860  | 1.64E-07       | 4.23E-03  | 42.17444758         | 1.53489E-08 |
| 6   | GeneID:7936      | <i>RDBP</i>         | 31919864  | 31926864  | rs1270942   | 31918860  | 9.83E-08       | 7.52E-03  | 42.05040786         | 1.62851E-08 |
| Chr | Gene.id          | Name                | Start     | End       | SNP.id      | SNP.pos   | pval(headache) | pval(TSH) | X <sup>2</sup> ,4df | FCP         |

| 6   | GeneID:100189159 | <i>TRNAS13</i>      | 28180815  | 28180896  | rs13197633  | 28174757  | 2.39E-08       | 3.28E-02  | 41.93350617         | 1.72195E-08 |
|-----|------------------|---------------------|-----------|-----------|-------------|-----------|----------------|-----------|---------------------|-------------|
| 6   | GeneID:222701    | <i>ZNF192P2</i>     | 28155716  | 28157189  | rs13195291  | 28169241  | 2.71E-08       | 2.99E-02  | 41.86609677         | 1.77824E-08 |
| 6   | GeneID:442179    | <i>OR1F12</i>       | 28041026  | 28042002  | rs71559070  | 28038929  | 4.14E-08       | 2.07E-02  | 41.75764003         | 1.8727E-08  |
| 6   | GeneID:222699    | <i>TOB2P1</i>       | 28183116  | 28186707  | rs13197633  | 28174757  | 2.53E-08       | 3.49E-02  | 41.69467954         | 1.92981E-08 |
| 6   | GeneID:7718      | <i>ZNF165</i>       | 28048482  | 28057341  | rs34166054  | 28065801  | 4.18E-08       | 2.12E-02  | 41.68570132         | 1.93809E-08 |
| 6   | GeneID:100507241 | <i>LOC100507241</i> | 28046570  | 28048908  | rs35902873  | 28058949  | 4.31E-08       | 2.18E-02  | 41.56912387         | 2.04894E-08 |
| 6   | GeneID:1388      | <i>ATF6B</i>        | 32083045  | 32096017  | rs1269852   | 32080191  | 8.71E-08       | 1.20E-02  | 41.36096822         | 2.26281E-08 |
| 1   | GeneID:359781    | <i>MRPS6P2</i>      | 51312141  | 51312514  | rs6684901   | 51298828  | 1.90E-04       | 5.70E-06  | 41.28412951         | 2.34727E-08 |
| 6   | GeneID:7745      | <i>ZNF192</i>       | 28109716  | 28125236  | rs35749575  | 28114818  | 2.60E-08       | 4.53E-02  | 41.11556892         | 2.54373E-08 |
| 6   | GeneID:721       | <i>C4B</i>          | 31982572  | 32003195  | rs433061    | 32014828  | 7.97E-08       | 1.50E-02  | 41.09084975         | 2.57389E-08 |
| 6   | GeneID:6499      | <i>SKIV2L</i>       | 31926581  | 31937532  | rs1270942   | 31918860  | 1.25E-07       | 9.57E-03  | 41.08797556         | 2.57742E-08 |
| 2   | GeneID:729582    | <i>DIRC3</i>        | 218148746 | 218621316 | rs7594886   | 218618815 | 3.70E-02       | 3.35E-08  | 41.02105498         | 2.66098E-08 |
| 6   | GeneID:100287272 | <i>USP8P1</i>       | 31243351  | 31246528  | rs2524107   | 31232590  | 2.00E-02       | 7.00E-08  | 40.77350025         | 2.99428E-08 |
| 6   | GeneID:100507444 | <i>PPP1R2P1</i>     | 32844255  | 32847851  | rs115591082 | 32844103  | 3.21E-06       | 4.57E-04  | 40.67900632         | 3.13221E-08 |
| 6   | GeneID:7741      | <i>ZNF187</i>       | 28234788  | 28245981  | rs13208096  | 28225311  | 4.30E-08       | 3.69E-02  | 40.52395067         | 3.3724E-08  |
| 6   | GeneID:6890      | <i>TAP1</i>         | 32812986  | 32821748  | rs45506201  | 32808299  | 7.54E-06       | 2.45E-04  | 40.21887975         | 3.89994E-08 |
| 6   | GeneID:100507463 | <i>LOC100507463</i> | 32811863  | 32814277  | rs45506201  | 32808299  | 8.22E-06       | 2.67E-04  | 39.87537493         | 4.59305E-08 |
| 6   | GeneID:4758      | <i>NEU1</i>         | 31826829  | 31830709  | rs501942    | 31840477  | 4.13E-07       | 5.37E-03  | 39.85533446         | 4.63708E-08 |
| 6   | GeneID:80736     | <i>SLC44A4</i>      | 31830969  | 31846823  | rs501942    | 31840477  | 3.38E-07       | 6.70E-03  | 39.80969225         | 4.73895E-08 |
| 6   | GeneID:10919     | <i>EHMT2</i>        | 31847536  | 31865464  | rs501942    | 31840477  | 3.44E-07       | 6.82E-03  | 39.74017229         | 4.89841E-08 |
| 3   | GeneID:100302112 | <i>MIR1284</i>      | 71591121  | 71591240  | rs7610856   | 71579022  | 1.79E-07       | 1.37E-02  | 39.64851165         | 5.11687E-08 |
| 6   | GeneID:5696      | <i>PSMB8</i>        | 32808494  | 32812712  | rs45506201  | 32808299  | 9.03E-06       | 2.93E-04  | 39.49725036         | 5.49883E-08 |
| 1   | GeneID:11124     | <i>FAF1</i>         | 50906935  | 51425936  | rs1278519   | 50897342  | 1.16E-04       | 2.37E-05  | 39.430244           | 5.677E-08   |
| 6   | GeneID:1589      | <i>CYP21A2</i>      | 32006093  | 32009447  | rs433061    | 32014828  | 1.23E-07       | 2.31E-02  | 39.35754551         | 5.87682E-08 |
| 11  | GeneID:710       | <i>SERPING1</i>     | 57365027  | 57382326  | rs184391280 | 57350423  | 1.56E-06       | 1.90E-03  | 39.27868983         | 6.1015E-08  |
| 6   | GeneID:7148      | <i>TNXB</i>         | 32008932  | 32077151  | rs1269852   | 32080191  | 1.80E-07       | 1.93E-02  | 38.95641287         | 7.11237E-08 |
| 17  | GeneID:79877     | <i>DCAKD</i>        | 43100706  | 43138473  | rs74656108  | 43086231  | 1.32E-03       | 3.10E-06  | 38.63001782         | 8.30645E-08 |
| 6   | GeneID:100287329 | <i>LOC100287329</i> | 31527348  | 31540474  | rs1800628   | 31546850  | 1.93E-07       | 2.15E-02  | 38.59553227         | 8.44374E-08 |
| Chr | Gene.id          | Name                | Start     | End       | SNP.id      | SNP.pos   | pval(headache) | pval(TSH) | X <sup>2</sup> ,4df | FCP         |

| 11  | GeneID:10978     | <i>CLPI</i>            | 57425216  | 57429337  | rs527528    | 57433327  | 3.03E-06       | 1.53E-03  | 38.37238471         | 9.38852E-08 |
|-----|------------------|------------------------|-----------|-----------|-------------|-----------|----------------|-----------|---------------------|-------------|
| 6   | GeneID:6891      | <i>TAP2</i>            | 32789610  | 32806547  | rs45506201  | 32808299  | 1.21E-05       | 3.93E-04  | 38.33023098         | 9.57848E-08 |
| 6   | GeneID:259197    | <i>NCR3</i>            | 31556660  | 31560762  | rs1800628   | 31546850  | 1.47E-07       | 3.50E-02  | 38.16953122         | 1.03385E-07 |
| 17  | GeneID:4836      | <i>NMT1</i>            | 43138680  | 43186384  | rs7207047   | 43198998  | 1.43E-03       | 3.69E-06  | 38.12702754         | 1.05494E-07 |
| 6   | GeneID:5698      | <i>PSMB9</i>           | 32821938  | 32827628  | rs45506201  | 32808299  | 4.07E-06       | 1.35E-03  | 38.04069866         | 1.0991E-07  |
| 11  | GeneID:280636    | <i>C11orf31</i>        | 57508722  | 57510883  | rs9420      | 57510294  | 2.00E-06       | 2.76E-03  | 38.03387168         | 1.10267E-07 |
| 17  | GeneID:6155      | <i>RPL27</i>           | 41150446  | 41154976  | rs2089858   | 41156153  | 7.29E-07       | 7.84E-03  | 37.96122104         | 1.14139E-07 |
| 11  | GeneID:100507231 | <i>LOC100507231</i>    | 57485518  | 57486002  | rs547891    | 57499065  | 2.07E-06       | 2.77E-03  | 37.95532371         | 1.14459E-07 |
| 11  | GeneID:406919    | <i>MIR130A</i>         | 57408671  | 57408759  | rs10750866  | 57404779  | 5.86E-06       | 1.02E-03  | 37.86650052         | 1.19391E-07 |
| 6   | GeneID:7124      | <i>TNF</i>             | 31543350  | 31546112  | rs1800628   | 31546850  | 1.61E-07       | 3.83E-02  | 37.80862057         | 1.22718E-07 |
| 11  | GeneID:219539    | <i>YPEL4</i>           | 57412560  | 57417417  | rs10750866  | 57404779  | 5.81E-06       | 1.12E-03  | 37.69432442         | 1.29563E-07 |
| 11  | GeneID:100507106 | <i>LOC100507106</i>    | 57405850  | 57420606  | rs527528    | 57433327  | 4.81E-06       | 1.38E-03  | 37.66378816         | 1.31455E-07 |
| 6   | GeneID:7940      | <i>LST1</i>            | 31553956  | 31556686  | rs1800628   | 31546850  | 1.67E-07       | 3.99E-02  | 37.65178406         | 1.32206E-07 |
| 6   | GeneID:4050      | <i>LTB</i>             | 31548335  | 31550202  | rs1800628   | 31546850  | 1.74E-07       | 4.15E-02  | 37.49319148         | 1.42544E-07 |
| 1   | GeneID:100422535 | <i>LOC100422535</i>    | 50871104  | 50871696  | rs2484680   | 50868417  | 6.30E-06       | 1.16E-03  | 37.46137369         | 1.44713E-07 |
| 17  | GeneID:79777     | <i>ACBD4</i>           | 43209967  | 43221543  | rs58219619  | 43207624  | 5.16E-05       | 1.49E-04  | 37.37124022         | 1.51038E-07 |
| 12  | GeneID:10019     | <i>SH2B3</i>           | 111843752 | 111889427 | rs3184504   | 111884608 | 1.41E-03       | 5.44E-06  | 37.3674985          | 1.51307E-07 |
| 17  | GeneID:146923    | <i>RUNDC1</i>          | 41132582  | 41145707  | rs2089858   | 41156153  | 8.51E-07       | 9.16E-03  | 37.33799659         | 1.5344E-07  |
| 14  | GeneID:7043      | <i>TGFB3</i>           | 76424442  | 76448092  | rs146047341 | 76448921  | 1.17E-06       | 6.76E-03  | 37.31433468         | 1.55173E-07 |
| 6   | GeneID:692233    | <i>SNORD117</i>        | 31504151  | 31504226  | rs9267488   | 31514247  | 4.78E-07       | 1.78E-02  | 37.16944879         | 1.66217E-07 |
| 1   | GeneID:100129919 | <i>HMGB1P45</i>        | 50864534  | 50865042  | rs2484680   | 50868417  | 6.78E-06       | 1.25E-03  | 37.16503664         | 1.66565E-07 |
| 12  | GeneID:10961     | <i>ERP29</i>           | 112451152 | 112461024 | rs4767296   | 112463366 | 2.46E-04       | 3.71E-05  | 37.02279977         | 1.78193E-07 |
| 17  | GeneID:3430      | <i>IFI35</i>           | 41158742  | 41166476  | rs2089858   | 41156153  | 1.08E-06       | 8.62E-03  | 36.98431569         | 1.81475E-07 |
| 6   | GeneID:692199    | <i>SNORD84</i>         | 31508878  | 31508955  | rs9267488   | 31514247  | 5.97E-07       | 1.56E-02  | 36.98331527         | 1.81562E-07 |
| 12  | GeneID:724085    | <i>LOC724085</i>       | 112437040 | 112438873 | rs7300252   | 112430346 | 3.43E-04       | 3.13E-05  | 36.69966729         | 2.07704E-07 |
| 6   | GeneID:534       | <i>ATP6V1G2</i>        | 31512228  | 31514625  | rs9267488   | 31514247  | 6.60E-07       | 1.72E-02  | 36.58858816         | 2.18936E-07 |
| 11  | GeneID:643376    | <i>BTBD18</i>          | 57510986  | 57519253  | rs9420      | 57510294  | 2.94E-06       | 4.06E-03  | 36.48535939         | 2.29917E-07 |
| 6   | GeneID:100532737 | <i>ATP6V1G2-DDX39B</i> | 31497996  | 31514625  | rs9267488   | 31514247  | 7.07E-07       | 1.84E-02  | 36.31557278         | 2.49183E-07 |
| Chr | Gene.id          | Name                   | Start     | End       | SNP.id      | SNP.pos   | pval(headache) | pval(TSH) | X <sup>2</sup> ,4df | FCP         |

|    |                  |                     |           |           |             |           |          |          |             |             |
|----|------------------|---------------------|-----------|-----------|-------------|-----------|----------|----------|-------------|-------------|
| 11 | GeneID:81210     | <i>OR5BA1P</i>      | 57633774  | 57634752  | rs11229148  | 57621460  | 4.96E-06 | 2.79E-03 | 36.1911953  | 2.64311E-07 |
| 17 | GeneID:10493     | <i>VAT1</i>         | 41166622  | 41174459  | rs2089858   | 41156153  | 1.32E-06 | 1.13E-02 | 36.03794999 | 2.84214E-07 |
| 12 | GeneID:100101246 | <i>LOC100101246</i> | 112019098 | 112019749 | rs653178    | 112007756 | 2.27E-03 | 6.85E-06 | 35.95705809 | 2.95316E-07 |
| 6  | GeneID:4795      | <i>NFKBIL1</i>      | 31514628  | 31526606  | rs9267488   | 31514247  | 8.11E-07 | 2.11E-02 | 35.76577935 | 3.23317E-07 |
| 1  | GeneID:63950     | <i>DMRTA2</i>       | 50883223  | 50889119  | rs2484680   | 50868417  | 6.71E-06 | 2.60E-03 | 35.72685827 | 3.2933E-07  |
| 20 | GeneID:284805    | <i>C20orf203</i>    | 31219427  | 31239783  | rs750396    | 31218729  | 1.59E-06 | 1.10E-02 | 35.72507123 | 3.29609E-07 |
| 1  | GeneID:1031      | <i>CDKN2C</i>       | 51434367  | 51440309  | rs12567744  | 51452563  | 1.71E-02 | 1.38E-06 | 35.13146434 | 4.36527E-07 |
| 12 | GeneID:100500889 | <i>MIR3657</i>      | 112475403 | 112475519 | rs4767296   | 112463366 | 1.27E-04 | 1.94E-04 | 35.0350818  | 4.5689E-07  |
| 11 | GeneID:1500      | <i>CTNND1</i>       | 57529234  | 57586652  | rs3781885   | 57570680  | 5.95E-06 | 4.31E-03 | 34.96115429 | 4.73148E-07 |
| 12 | GeneID:89894     | <i>TMEM116</i>      | 112369086 | 112451023 | rs4767296   | 112463366 | 3.92E-04 | 6.92E-05 | 34.84510003 | 4.99842E-07 |
| 8  | GeneID:286043    | <i>MRPS18CP2</i>    | 8791228   | 8791520   | rs878504    | 8783506   | 9.79E-07 | 2.82E-02 | 34.81208989 | 5.07705E-07 |
| 17 | GeneID:10614     | <i>HEXIM1</i>       | 43224684  | 43229468  | rs1056619   | 43209727  | 3.90E-05 | 7.89E-04 | 34.59160823 | 5.63481E-07 |
| 17 | GeneID:80755     | <i>AARSD1</i>       | 41102543  | 41132545  | rs323500    | 41140545  | 4.07E-06 | 8.75E-03 | 34.30141477 | 6.46303E-07 |
| 17 | GeneID:22834     | <i>ZNF652</i>       | 47366568  | 47439835  | rs7209400   | 47450057  | 1.03E-02 | 4.01E-06 | 33.99879491 | 7.45613E-07 |
| 12 | GeneID:6311      | <i>ATXN2</i>        | 111890018 | 112037480 | rs3184504   | 111884608 | 2.46E-03 | 1.71E-05 | 33.9643456  | 7.57841E-07 |
| 14 | GeneID:112752    | <i>IFT43</i>        | 76452096  | 76550092  | rs146047341 | 76448921  | 3.43E-06 | 2.26E-02 | 32.75035247 | 1.34363E-06 |
| 17 | GeneID:8153      | <i>RND2</i>         | 41177258  | 41184058  | rs455055    | 41167957  | 7.28E-06 | 1.12E-02 | 32.6439699  | 1.4127E-06  |
| 19 | GeneID:23403     | <i>FBXO46</i>       | 46213887  | 46234151  | rs7256524   | 46224654  | 1.40E-04 | 6.21E-04 | 32.51543131 | 1.50088E-06 |
| 1  | GeneID:2582      | <i>GALE</i>         | 24122089  | 24127294  | rs12041159  | 24127660  | 6.68E-05 | 1.31E-03 | 32.50465845 | 1.50852E-06 |
| 3  | GeneID:100506815 | <i>FOXP1-IT1</i>    | 71619425  | 71623608  | rs62244889  | 71609007  | 5.07E-06 | 1.73E-02 | 32.4944075  | 1.51582E-06 |
| 1  | GeneID:11313     | <i>LYPLA2</i>       | 24117646  | 24122029  | rs12041159  | 24127660  | 7.11E-05 | 1.40E-03 | 32.25077364 | 1.7001E-06  |
| 1  | GeneID:100509213 | <i>LOC100509213</i> | 24114238  | 24120044  | rs12041159  | 24127660  | 7.23E-05 | 1.42E-03 | 32.18375618 | 1.75459E-06 |
| 12 | GeneID:654427    | <i>PCNPP1</i>       | 112104737 | 112108183 | rs10849966  | 112100773 | 4.00E-04 | 2.74E-04 | 32.05396611 | 1.86512E-06 |
| 12 | GeneID:642580    | <i>LOC642580</i>    | 111819590 | 111823484 | rs10849943  | 111819589 | 1.42E-03 | 8.36E-05 | 31.90057235 | 2.00473E-06 |
| 17 | GeneID:100271450 | <i>RPL21P124</i>    | 47477791  | 47478162  | rs2233659   | 47492587  | 1.01E-04 | 1.19E-03 | 31.8665365  | 2.03709E-06 |
| 17 | GeneID:124871    | <i>FLJ40194</i>     | 47325605  | 47336027  | rs9893777   | 47336686  | 2.29E-02 | 5.40E-06 | 31.81273715 | 2.08931E-06 |

Chr, chromosome number; Gene.id, Gene ID; Name, Gene; Start, start point of the gene; End, end point of the gene; SNP.id, top SNP associated with the gene; SNP.pos, position of the top SNP; pval(headache), p-value of the gene in headache dataset; pval(TSH), p-value of the gene in TSH dataset.

**Supplementary Table S14.** Genes overlapping headache and fT4 at  $p < 0.05$  and Fisher combined p-value ( $p_{\text{FCP}} < 2.09 \times 10^{-6}$ ).

| Chr | Gene.id          | Name                | Start     | End       | SNP.id      | SNP.pos   | pval(headache) | pval(fT4) | X <sup>2</sup> ,4df | FCP         |
|-----|------------------|---------------------|-----------|-----------|-------------|-----------|----------------|-----------|---------------------|-------------|
| 1   | GeneID:115353    | <i>LRRC42</i>       | 54412037  | 54433839  | rs12094064  | 54445959  | 2.93E-02       | 1.82E-90  | 420.3293134         | 1.12531E-89 |
| 1   | GeneID:100421395 | <i>LOC100421395</i> | 54440851  | 54441704  | rs12094064  | 54445959  | 2.57E-02       | 1.15E-68  | 320.2031427         | 4.74101E-68 |
| 1   | GeneID:9528      | <i>TMEM59</i>       | 54497349  | 54519111  | rs114621143 | 54530630  | 3.12E-02       | 1.50E-42  | 199.5393416         | 4.71968E-42 |
| 1   | GeneID:100652969 | <i>LOC100652969</i> | 54500068  | 54500521  | rs75070374  | 54508231  | 3.69E-02       | 4.27E-40  | 187.9029098         | 1.4959E-39  |
| 1   | GeneID:127428    | <i>TCEANC2</i>      | 54519274  | 54565416  | rs114540611 | 54574645  | 1.37E-02       | 5.33E-32  | 152.5987302         | 5.64654E-32 |
| 1   | GeneID:100507586 | <i>LOC100507586</i> | 54555529  | 54555771  | rs79659235  | 54548012  | 1.63E-02       | 1.10E-31  | 150.8045374         | 1.36873E-31 |
| 4   | GeneID:51166     | <i>AADAT</i>        | 170981373 | 171011372 | rs11731427  | 170991011 | 3.12E-05       | 6.53E-23  | 122.9168955         | 1.27212E-25 |
| 1   | GeneID:100616315 | <i>MIR4781</i>      | 54519752  | 54519827  | rs114621143 | 54530630  | 2.05E-02       | 4.39E-25  | 119.9480946         | 5.47958E-25 |
| 4   | GeneID:9848      | <i>MFAP3L</i>       | 170907748 | 170947429 | rs7676821   | 170961647 | 5.82E-05       | 2.76E-21  | 114.1819348         | 9.3286E-24  |
| 4   | GeneID:100506085 | <i>LOC100506085</i> | 170838912 | 170897053 | rs112036152 | 170886594 | 7.90E-04       | 7.62E-18  | 93.11885282         | 2.86243E-19 |
| 12  | GeneID:390332    | <i>LOC390332</i>    | 57375021  | 57379744  | rs4759042   | 57377347  | 8.69E-18       | 5.46E-03  | 88.98869812         | 2.15927E-18 |
| 12  | GeneID:100420982 | <i>LOC100420982</i> | 57332234  | 57335266  | rs840161    | 57323523  | 1.55E-17       | 1.89E-02  | 85.34843533         | 1.27952E-17 |
| 12  | GeneID:121214    | <i>SDR9C7</i>       | 57316938  | 57328189  | rs840161    | 57323523  | 1.78E-17       | 2.16E-02  | 84.80663595         | 1.66723E-17 |
| 12  | GeneID:8608      | <i>RDH16</i>        | 57345215  | 57351418  | rs725957    | 57331741  | 6.34E-17       | 8.82E-03  | 84.05492975         | 2.40685E-17 |
| 6   | GeneID:10050     | <i>SLC17A4</i>      | 25754927  | 25781403  | rs13200921  | 25790378  | 2.72E-08       | 1.68E-10  | 79.85585195         | 1.86871E-16 |
| 6   | GeneID:6568      | <i>SLC17A1</i>      | 25783125  | 25832287  | rs9467607   | 25809477  | 2.89E-08       | 1.87E-10  | 79.51789273         | 2.2036E-16  |
| 6   | GeneID:85303     | <i>HIST1H2APS2</i>  | 25882154  | 25882644  | rs13208859  | 25894609  | 3.37E-08       | 8.93E-10  | 76.08759206         | 1.17312E-15 |
| 6   | GeneID:10786     | <i>SLC17A3</i>      | 25845328  | 25874471  | rs6913795   | 25848025  | 3.99E-08       | 9.49E-10  | 75.62372871         | 1.47055E-15 |
| 6   | GeneID:10338     | <i>HIST1H1PS2</i>   | 26016335  | 26017069  | rs10484435  | 26031811  | 4.74E-08       | 5.73E-09  | 71.68360594         | 1.00102E-14 |
| 14  | GeneID:1734      | <i>DIO2</i>         | 80663868  | 80697397  | rs145536356 | 80687991  | 1.76E-02       | 5.97E-14  | 68.98158877         | 3.72352E-14 |
| 6   | GeneID:10590     | <i>SCGN</i>         | 25652429  | 25702011  | rs35436081  | 25700342  | 4.99E-08       | 6.12E-08  | 66.84616898         | 1.05048E-13 |
| 6   | GeneID:255626    | <i>HIST1H2BA</i>    | 25727137  | 25727573  | rs34493019  | 25714959  | 1.23E-07       | 3.28E-08  | 66.2935433          | 1.37369E-13 |
| 6   | GeneID:221613    | <i>HIST1H2AA</i>    | 25726291  | 25726790  | rs34493019  | 25714959  | 1.19E-07       | 3.40E-08  | 66.27939967         | 1.38316E-13 |
| 1   | GeneID:4209      | <i>MEF2D</i>        | 156433519 | 156470529 | rs1050316   | 156434703 | 3.01E-13       | 2.38E-02  | 65.13972494         | 2.40457E-13 |
| 14  | GeneID:100628307 | <i>LOC100628307</i> | 80677762  | 80921810  | rs113550880 | 80912456  | 4.17E-02       | 2.81E-13  | 64.1559074          | 3.8749E-13  |
| Chr | Gene.id          | Name                | Start     | End       | SNP.id      | SNP.pos   | pval(headache) | pval(fT4) | X <sup>2</sup> ,4df | FCP         |



| 6   | GeneID:100419971 | <i>LOC100419971</i> | 25679007  | 25679651  | rs13191296  | 25684606  | 3.07E-07       | 1.36E-07  | 61.61695182         | 1.32615E-12 |
|-----|------------------|---------------------|-----------|-----------|-------------|-----------|----------------|-----------|---------------------|-------------|
| 6   | GeneID:10246     | <i>SLC17A2</i>      | 25912982  | 25930946  | rs35169013  | 25918027  | 3.06E-08       | 1.87E-06  | 60.98393293         | 1.8018E-12  |
| 6   | GeneID:100652981 | <i>LOC100652981</i> | 26854360  | 26854727  | rs77666565  | 26851415  | 4.30E-11       | 1.58E-03  | 60.64648741         | 2.12153E-12 |
| 1   | GeneID:100422997 | <i>MIR4257</i>      | 150524405 | 150524490 | rs6693567   | 150510660 | 2.20E-11       | 3.55E-03  | 60.36478968         | 2.43143E-12 |
| 1   | GeneID:54507     | <i>ADAMTSL4</i>     | 150521898 | 150533413 | rs6693567   | 150510660 | 2.78E-11       | 4.48E-03  | 59.42794755         | 3.82579E-12 |
| 6   | GeneID:10475     | <i>TRIM38</i>       | 25963071  | 25985358  | rs13203673  | 25979122  | 4.50E-08       | 5.56E-06  | 58.03372626         | 7.50761E-12 |
| 6   | GeneID:3024      | <i>HIST1H1A</i>     | 26017260  | 26018040  | rs10484435  | 26031811  | 4.86E-08       | 1.23E-05  | 56.28662293         | 1.74604E-11 |
| 6   | GeneID:100189391 | <i>TRNAM20</i>      | 26766444  | 26766516  | rs34244947  | 26761745  | 4.05E-11       | 1.55E-02  | 56.19566258         | 1.82443E-11 |
| 6   | GeneID:100189156 | <i>TRNAA20</i>      | 26771290  | 26771362  | rs34244947  | 26761745  | 4.05E-11       | 1.55E-02  | 56.19566258         | 1.82443E-11 |
| 6   | GeneID:8350      | <i>HIST1H3A</i>     | 26020718  | 26021186  | rs10484435  | 26031811  | 5.03E-08       | 1.28E-05  | 56.15003408         | 1.86507E-11 |
| 6   | GeneID:8359      | <i>HIST1H4A</i>     | 26021907  | 26022278  | rs10484435  | 26031811  | 5.04E-08       | 1.28E-05  | 56.14296521         | 1.87145E-11 |
| 6   | GeneID:8366      | <i>HIST1H4B</i>     | 26027124  | 26027480  | rs10484435  | 26031811  | 5.09E-08       | 1.32E-05  | 56.0515337          | 1.95591E-11 |
| 11  | GeneID:25921     | <i>ZDHHC5</i>       | 57435474  | 57468659  | rs143262971 | 57468415  | 1.83E-09       | 4.35E-04  | 55.71185746         | 2.30441E-11 |
| 6   | GeneID:729392    | <i>POM121L6P</i>    | 26838446  | 26865940  | rs77666565  | 26851415  | 1.62E-10       | 5.96E-03  | 55.3271549          | 2.77454E-11 |
| 11  | GeneID:219541    | <i>MED19</i>        | 57471186  | 57479673  | rs143262971 | 57468415  | 1.10E-09       | 1.93E-03  | 53.76227286         | 5.90176E-11 |
| 6   | GeneID:100189354 | <i>TRNAM19</i>      | 26758550  | 26758622  | rs34244947  | 26761745  | 7.96E-11       | 3.04E-02  | 53.49506568         | 6.71303E-11 |
| 6   | GeneID:11118     | <i>BTN3A2</i>       | 26365398  | 26378548  | rs2072803   | 26392515  | 1.32E-10       | 2.16E-02  | 53.17608959         | 7.82852E-11 |
| 6   | GeneID:11119     | <i>BTN3A1</i>       | 26402465  | 26415444  | rs2072803   | 26392515  | 9.22E-11       | 3.46E-02  | 52.94073216         | 8.76861E-11 |
| 6   | GeneID:10385     | <i>BTN2A2</i>       | 26383324  | 26395102  | rs2072803   | 26392515  | 1.41E-10       | 2.32E-02  | 52.89173145         | 8.97808E-11 |
| 11  | GeneID:710       | <i>SERPING1</i>     | 57365027  | 57382326  | rs184391280 | 57350423  | 1.56E-06       | 3.12E-06  | 52.09779556         | 1.316E-10   |
| 6   | GeneID:100507141 | <i>LOC100507141</i> | 26864941  | 26865525  | rs77666565  | 26851415  | 1.54E-10       | 3.65E-02  | 51.8021796          | 1.51729E-10 |
| 6   | GeneID:729400    | <i>LOC729400</i>    | 26866104  | 26868093  | rs77666565  | 26851415  | 1.54E-10       | 3.65E-02  | 51.8021796          | 1.51729E-10 |
| 6   | GeneID:100188987 | <i>TRNAH3</i>       | 27125906  | 27125977  | rs67540232  | 27140866  | 2.56E-10       | 2.20E-02  | 51.80208346         | 1.51736E-10 |
| 11  | GeneID:100528016 | <i>TMX2-CTNND1</i>  | 57479995  | 57586652  | rs143262971 | 57468415  | 2.81E-09       | 2.04E-03  | 51.76935918         | 1.54146E-10 |
| 6   | GeneID:80740     | <i>LY6G6C</i>       | 31686425  | 31689510  | rs3131383   | 31704294  | 3.74E-08       | 1.55E-04  | 51.74605365         | 1.55885E-10 |
| 6   | GeneID:100189336 | <i>TRNAI20</i>      | 27144994  | 27145067  | rs34569203  | 27153984  | 1.63E-10       | 3.59E-02  | 51.73042711         | 1.57062E-10 |
| 6   | GeneID:100189143 | <i>TRNAT7</i>       | 27130050  | 27130123  | rs13194053  | 27143883  | 2.52E-10       | 2.39E-02  | 51.66706572         | 1.61926E-10 |
| 6   | GeneID:3006      | <i>HIST1H1C</i>     | 26055968  | 26056699  | rs3752417   | 26045905  | 2.39E-08       | 3.38E-04  | 51.08175112         | 2.14612E-10 |
| Chr | Gene.id          | Name                | Start     | End       | SNP.id      | SNP.pos   | pval(headache) | pval(fT4) | X <sup>2</sup> ,4df | FCP         |

| 6   | GeneID:10341     | <i>HIST1H2APS5</i>  | 26044128 | 26044778 | rs3752417  | 26045905 | 2.46E-08       | 3.48E-04  | 50.96713144         | 2.2678E-10  |
|-----|------------------|---------------------|----------|----------|------------|----------|----------------|-----------|---------------------|-------------|
| 6   | GeneID:8364      | <i>HIST1H4C</i>     | 26104176 | 26104565 | rs2237228  | 26104630 | 4.38E-08       | 2.06E-04  | 50.86507572         | 2.38192E-10 |
| 6   | GeneID:8352      | <i>HIST1H3C</i>     | 26045639 | 26046097 | rs3752417  | 26045905 | 2.54E-08       | 3.58E-04  | 50.8469264          | 2.40281E-10 |
| 6   | GeneID:3018      | <i>HIST1H2BB</i>    | 26043455 | 26043885 | rs3752417  | 26045905 | 2.55E-08       | 3.61E-04  | 50.82003661         | 2.4341E-10  |
| 6   | GeneID:100189131 | <i>TRNAI6</i>       | 27599200 | 27599293 | rs35715914 | 27592003 | 1.52E-08       | 6.83E-04  | 50.58519051         | 2.7252E-10  |
| 6   | GeneID:8334      | <i>HIST1H2AC</i>    | 26124373 | 26124918 | rs13200797 | 26122957 | 5.99E-08       | 1.88E-04  | 50.42359748         | 2.94545E-10 |
| 6   | GeneID:100189196 | <i>TRNAV20</i>      | 27118022 | 27118094 | rs61240102 | 27124904 | 3.85E-10       | 2.93E-02  | 50.41113904         | 2.96315E-10 |
| 6   | GeneID:8347      | <i>HIST1H2BC</i>    | 26123695 | 26124132 | rs13200797 | 26122957 | 6.02E-08       | 1.88E-04  | 50.40750999         | 2.96833E-10 |
| 6   | GeneID:3077      | <i>HFE</i>          | 26087509 | 26095469 | rs71557316 | 26072981 | 3.69E-08       | 3.10E-04  | 50.38760321         | 2.99688E-10 |
| 11  | GeneID:406919    | <i>MIR130A</i>      | 57408671 | 57408759 | rs10750866 | 57404779 | 5.86E-06       | 2.09E-06  | 50.25447894         | 3.19501E-10 |
| 11  | GeneID:219539    | <i>YPEL4</i>        | 57412560 | 57417417 | rs10750866 | 57404779 | 5.81E-06       | 2.18E-06  | 50.18890438         | 3.29736E-10 |
| 6   | GeneID:8335      | <i>HIST1H2AB</i>    | 26033320 | 26033796 | rs3752417  | 26045905 | 2.64E-08       | 4.87E-04  | 50.15496333         | 3.35161E-10 |
| 6   | GeneID:100422934 | <i>MIR3143</i>      | 27115405 | 27115467 | rs61240102 | 27124904 | 4.11E-10       | 3.15E-02  | 50.14120751         | 3.37385E-10 |
| 6   | GeneID:85235     | <i>HIST1H2AH</i>    | 27114908 | 27115346 | rs61240102 | 27124904 | 4.11E-10       | 3.15E-02  | 50.1409218          | 3.37432E-10 |
| 6   | GeneID:8358      | <i>HIST1H3B</i>     | 26031817 | 26032288 | rs3752417  | 26045905 | 2.71E-08       | 5.00E-04  | 50.0469554          | 3.53026E-10 |
| 6   | GeneID:3010      | <i>HIST1H1T</i>     | 26107640 | 26108364 | rs2237228  | 26104630 | 6.62E-08       | 2.08E-04  | 50.01423145         | 3.58624E-10 |
| 6   | GeneID:100189300 | <i>TRNAT13</i>      | 27586135 | 27586208 | rs35715914 | 27592003 | 1.76E-08       | 7.89E-04  | 50.00591007         | 3.60062E-10 |
| 11  | GeneID:100507106 | <i>LOC100507106</i> | 57405850 | 57420606 | rs527528   | 57433327 | 4.81E-06       | 3.10E-06  | 49.85811569         | 3.86576E-10 |
| 6   | GeneID:8294      | <i>HIST1H4I</i>     | 27107088 | 27107457 | rs67330695 | 27103654 | 4.55E-10       | 3.36E-02  | 49.80886013         | 3.95838E-10 |
| 6   | GeneID:442172    | <i>LOC442172</i>    | 27235885 | 27237008 | rs35982103 | 27243134 | 7.09E-10       | 2.26E-02  | 49.71397623         | 4.1431E-10  |
| 6   | GeneID:85236     | <i>HIST1H2BK</i>    | 27106072 | 27114637 | rs61240102 | 27124904 | 5.18E-10       | 3.83E-02  | 49.28778331         | 5.08485E-10 |
| 6   | GeneID:100189213 | <i>TRNAI11</i>      | 27242990 | 27243063 | rs35982103 | 27243134 | 7.02E-10       | 2.84E-02  | 49.27838228         | 5.10787E-10 |
| 6   | GeneID:7202      | <i>TRNAI1</i>       | 27241739 | 27241812 | rs35982103 | 27243134 | 7.11E-10       | 2.88E-02  | 49.22321983         | 5.24506E-10 |
| 6   | GeneID:100289545 | <i>HIST1H3PS1</i>   | 26322104 | 26343616 | rs9393703  | 26356951 | 5.58E-10       | 3.68E-02  | 49.21572738         | 5.26398E-10 |
| 6   | GeneID:10279     | <i>PRSSI6</i>       | 27215502 | 27224399 | rs35589403 | 27219491 | 6.85E-10       | 3.48E-02  | 48.91900616         | 6.07048E-10 |
| 6   | GeneID:29777     | <i>ABT1</i>         | 26597171 | 26600278 | rs34781270 | 26593037 | 7.08E-10       | 3.45E-02  | 48.87482951         | 6.20067E-10 |
| 6   | GeneID:100189301 | <i>TRNAL28</i>      | 27573417 | 27573524 | rs34105070 | 27560805 | 2.64E-08       | 9.33E-04  | 48.85096488         | 6.27216E-10 |
| 6   | GeneID:100189219 | <i>TRNAY8</i>       | 26595102 | 26595190 | rs34781270 | 26593037 | 7.24E-10       | 3.53E-02  | 48.78221265         | 6.48274E-10 |
| Chr | Gene.id          | Name                | Start    | End      | SNP.id     | SNP.pos  | pval(headache) | pval(fT4) | X <sup>2</sup> ,4df | FCP         |

| 6   | GeneID:100189172 | <i>TRNAP10</i>      | 27059521  | 27059592  | rs6904071   | 27047256  | 6.30E-10       | 4.10E-02  | 48.76062989         | 6.55029E-10 |
|-----|------------------|---------------------|-----------|-----------|-------------|-----------|----------------|-----------|---------------------|-------------|
| 6   | GeneID:100189157 | <i>TRNASI2</i>      | 27065085  | 27065166  | rs34388707  | 27050396  | 6.90E-10       | 3.77E-02  | 48.74471523         | 6.60055E-10 |
| 6   | GeneID:696       | <i>BTN1A1</i>       | 26501495  | 26510653  | rs34148261  | 26511744  | 1.09E-09       | 2.51E-02  | 48.64408873         | 6.92738E-10 |
| 6   | GeneID:100189162 | <i>TRNAY7</i>       | 26577332  | 26577420  | rs13190739  | 26587373  | 8.06E-10       | 3.66E-02  | 48.4925477          | 7.45031E-10 |
| 6   | GeneID:100420941 | <i>LOC100420941</i> | 26478093  | 26478749  | rs13195401  | 26463574  | 6.36E-10       | 4.65E-02  | 48.48723709         | 7.46933E-10 |
| 6   | GeneID:791231    | <i>TRNAV8</i>       | 27618707  | 27618779  | rs144969912 | 27616843  | 2.04E-08       | 1.54E-03  | 48.35932092         | 7.94249E-10 |
| 6   | GeneID:7746      | <i>ZNF193</i>       | 28193029  | 28201265  | rs17720293  | 28214698  | 1.49E-08       | 2.16E-03  | 48.32139517         | 8.08845E-10 |
| 6   | GeneID:387036    | <i>GUSBP2</i>       | 26839266  | 26924333  | rs77666565  | 26851415  | 8.71E-10       | 3.71E-02  | 48.31144917         | 8.12716E-10 |
| 6   | GeneID:387046    | <i>RPL8P1</i>       | 27620370  | 27620512  | rs144969912 | 27616843  | 2.07E-08       | 1.56E-03  | 48.30474427         | 8.15337E-10 |
| 6   | GeneID:100189337 | <i>TRNAY12</i>      | 26575798  | 26575887  | rs13190739  | 26587373  | 8.45E-10       | 3.84E-02  | 48.30310606         | 8.15978E-10 |
| 6   | GeneID:100189363 | <i>TRNAV27</i>      | 27248049  | 27248121  | rs35982103  | 27243134  | 8.92E-10       | 4.02E-02  | 48.101398           | 8.98947E-10 |
| 6   | GeneID:100189462 | <i>TRNAI28P</i>     | 27251864  | 27251937  | rs35982103  | 27243134  | 9.29E-10       | 4.19E-02  | 47.93633649         | 9.73069E-10 |
| 6   | GeneID:80739     | <i>C6orf25</i>      | 31691121  | 31694487  | rs3101018   | 31705864  | 8.54E-08       | 4.75E-04  | 47.85621443         | 1.01122E-09 |
| 6   | GeneID:100189038 | <i>TRNAL8</i>       | 27570348  | 27570454  | rs34105070  | 27560805  | 2.81E-08       | 1.45E-03  | 47.84663608         | 1.01588E-09 |
| 2   | GeneID:151507    | <i>MSL3P1</i>       | 234774083 | 234777055 | rs141028193 | 234772421 | 2.07E-09       | 2.39E-02  | 47.45235929         | 1.22746E-09 |
| 6   | GeneID:100189205 | <i>TRNASI5</i>      | 27640229  | 27640310  | rs13217620  | 27653120  | 2.46E-08       | 2.08E-03  | 47.39141083         | 1.26388E-09 |
| 6   | GeneID:4049      | <i>LTA</i>          | 31539876  | 31542098  | rs1800628   | 31546850  | 1.42E-07       | 3.63E-04  | 47.37706971         | 1.27261E-09 |
| 6   | GeneID:222699    | <i>TOB2P1</i>       | 28183116  | 28186707  | rs13197633  | 28174757  | 2.53E-08       | 2.17E-03  | 47.24694536         | 1.35458E-09 |
| 6   | GeneID:259197    | <i>NCR3</i>         | 31556660  | 31560762  | rs1800628   | 31546850  | 1.47E-07       | 3.76E-04  | 47.23436875         | 1.36278E-09 |
| 6   | GeneID:100189159 | <i>TRNASI3</i>      | 28180815  | 28180896  | rs13197633  | 28174757  | 2.39E-08       | 2.34E-03  | 47.22048995         | 1.37188E-09 |
| 6   | GeneID:100189297 | <i>TRNAM15</i>      | 27560600  | 27560671  | rs34105070  | 27560805  | 3.13E-08       | 1.79E-03  | 47.21397417         | 1.37618E-09 |
| 6   | GeneID:100189268 | <i>TRNAQ21</i>      | 27515531  | 27515602  | rs35848276  | 27521096  | 1.72E-08       | 3.33E-03  | 47.16242896         | 1.41063E-09 |
| 6   | GeneID:100189053 | <i>TRNAK8</i>       | 27559593  | 27559665  | rs34105070  | 27560805  | 3.26E-08       | 1.86E-03  | 47.05265387         | 1.48689E-09 |
| 6   | GeneID:23564     | <i>DDAH2</i>        | 31694817  | 31698039  | rs3132445   | 31712196  | 1.05E-07       | 5.83E-04  | 47.0396433          | 1.4962E-09  |
| 6   | GeneID:94017     | <i>TRNASI</i>       | 27513468  | 27513549  | rs35848276  | 27521096  | 1.71E-08       | 3.66E-03  | 46.9876468          | 1.53398E-09 |
| 6   | GeneID:100189070 | <i>TRNAS9</i>       | 27521192  | 27521273  | rs35848276  | 27521096  | 1.82E-08       | 3.51E-03  | 46.94692738         | 1.56423E-09 |
| 6   | GeneID:7124      | <i>TNF</i>          | 31543350  | 31546112  | rs1800628   | 31546850  | 1.59E-07       | 4.08E-04  | 46.91340439         | 1.58958E-09 |
| 6   | GeneID:100189428 | <i>TRNAR29</i>      | 27638344  | 27638416  | rs13217620  | 27653120  | 2.79E-08       | 2.35E-03  | 46.89505506         | 1.60363E-09 |
| Chr | Gene.id          | Name                | Start     | End       | SNP.id      | SNP.pos   | pval(headache) | pval(fT4) | X <sup>2</sup> ,4df | FCP         |

| 6   | GeneID:100189095 | <i>TRNAI5</i>       | 27636362  | 27636435  | rs56405707  | 27640246  | 2.97E-08       | 2.26E-03  | 46.85303264         | 1.63627E-09 |
|-----|------------------|---------------------|-----------|-----------|-------------|-----------|----------------|-----------|---------------------|-------------|
| 6   | GeneID:7940      | <i>LST1</i>         | 31553956  | 31556686  | rs1800628   | 31546850  | 1.67E-07       | 4.28E-04  | 46.71680093         | 1.74672E-09 |
| 6   | GeneID:4050      | <i>LTB</i>          | 31548335  | 31550202  | rs1800628   | 31546850  | 1.77E-07       | 4.54E-04  | 46.48444591         | 1.95255E-09 |
| 6   | GeneID:100189352 | <i>TRNAS24</i>      | 27509554  | 27509635  | rs35848276  | 27521096  | 1.99E-08       | 4.26E-03  | 46.37959766         | 2.0532E-09  |
| 6   | GeneID:80737     | <i>C6orf27</i>      | 31733371  | 31745108  | rs3117573   | 31718396  | 1.32E-07       | 6.69E-04  | 46.30183116         | 2.13117E-09 |
| 6   | GeneID:100128240 | <i>LOC100128240</i> | 27528605  | 27529550  | rs35848276  | 27521096  | 2.14E-08       | 4.14E-03  | 46.28966561         | 2.14364E-09 |
| 6   | GeneID:100189012 | <i>TRNAR5</i>       | 27529963  | 27530049  | rs35848276  | 27521096  | 2.14E-08       | 4.14E-03  | 46.28966561         | 2.14364E-09 |
| 6   | GeneID:1192      | <i>CLIC1</i>        | 31698358  | 31704341  | rs3130484   | 31715882  | 1.20E-07       | 7.45E-04  | 46.27348502         | 2.16032E-09 |
| 6   | GeneID:100287329 | <i>LOC100287329</i> | 31527348  | 31540474  | rs1800628   | 31546850  | 1.92E-07       | 4.92E-04  | 46.16483004         | 2.2758E-09  |
| 6   | GeneID:4758      | <i>NEU1</i>         | 31826829  | 31830709  | rs501942    | 31840477  | 4.13E-07       | 2.31E-04  | 46.14874164         | 2.29342E-09 |
| 6   | GeneID:100189200 | <i>TRNAD9</i>       | 27551236  | 27551307  | rs34105070  | 27560805  | 3.00E-08       | 3.32E-03  | 46.06199147         | 2.39077E-09 |
| 11  | GeneID:81210     | <i>OR5BA1P</i>      | 57633774  | 57634752  | rs11229148  | 57621460  | 5.28E-06       | 1.90E-05  | 46.04841448         | 2.40637E-09 |
| 6   | GeneID:80736     | <i>SLC44A4</i>      | 31830969  | 31846823  | rs501942    | 31840477  | 3.46E-07       | 2.95E-04  | 46.01261248         | 2.44801E-09 |
| 6   | GeneID:387032    | <i>ZKSCAN4</i>      | 28212490  | 28220002  | rs17720293  | 28214698  | 1.51E-08       | 6.88E-03  | 45.9754695          | 2.49197E-09 |
| 6   | GeneID:401251    | <i>C6orf26</i>      | 31730773  | 31732627  | rs3130484   | 31715882  | 1.39E-07       | 7.50E-04  | 45.96675582         | 2.5024E-09  |
| 6   | GeneID:10919     | <i>EHMT2</i>        | 31847536  | 31865464  | rs501942    | 31840477  | 3.58E-07       | 3.05E-04  | 45.87700332         | 2.61236E-09 |
| 6   | GeneID:645950    | <i>HNRNPA1P1</i>    | 27491226  | 27492316  | rs34573979  | 27480526  | 1.29E-08       | 8.74E-03  | 45.8068534          | 2.70165E-09 |
| 2   | GeneID:55355     | <i>HJURP</i>        | 234745486 | 234763212 | rs141028193 | 234772421 | 4.15E-09       | 3.52E-02  | 45.2980288          | 3.44724E-09 |
| 6   | GeneID:100189315 | <i>TRNAM17</i>      | 27870271  | 27870342  | rs13218875  | 27884012  | 2.14E-08       | 6.82E-03  | 45.29470707         | 3.45272E-09 |
| 6   | GeneID:222698    | <i>NKAPL</i>        | 28227098  | 28228736  | rs17720293  | 28214698  | 1.25E-08       | 1.21E-02  | 45.23198152         | 3.558E-09   |
| 6   | GeneID:651302    | <i>ZNF192P1</i>     | 28129551  | 28137376  | rs35749575  | 28114818  | 2.50E-08       | 6.17E-03  | 45.18611587         | 3.637E-09   |
| 6   | GeneID:5491      | <i>PPIAP9</i>       | 31486754  | 31488108  | rs3130614   | 31476458  | 2.03E-07       | 7.78E-04  | 45.13599207         | 3.72535E-09 |
| 6   | GeneID:100189161 | <i>TRNAV17</i>      | 27648885  | 27648957  | rs13217620  | 27653120  | 2.56E-08       | 6.24E-03  | 45.11767929         | 3.75815E-09 |
| 6   | GeneID:100189314 | <i>TRNAG29</i>      | 27870686  | 27870756  | rs13218875  | 27884012  | 2.24E-08       | 7.25E-03  | 45.08402782         | 3.81919E-09 |
| 6   | GeneID:100189071 | <i>TRNAI4</i>       | 27655967  | 27656040  | rs13217620  | 27653120  | 2.60E-08       | 6.33E-03  | 45.0573955          | 3.8682E-09  |
| 6   | GeneID:790951    | <i>TRNAS4</i>       | 27499987  | 27500068  | rs13195636  | 27509493  | 2.35E-08       | 7.16E-03  | 45.01163457         | 3.95388E-09 |
| 6   | GeneID:7754      | <i>ZNF204P</i>      | 27325602  | 27343153  | rs67859638  | 27357978  | 7.84E-09       | 2.15E-02  | 45.00595869         | 3.96463E-09 |
| 6   | GeneID:100189340 | <i>TRNAT15</i>      | 27652474  | 27652547  | rs13217620  | 27653120  | 2.63E-08       | 6.43E-03  | 44.99887515         | 3.9781E-09  |
| Chr | Gene.id          | Name                | Start     | End       | SNP.id      | SNP.pos   | pval(headache) | pval(fT4) | X <sup>2</sup> ,4df | FCP         |

| 6   | GeneID:100419608 | <i>LOC100419608</i> | 28083427  | 28083998  | rs66886492 | 28089731  | 1.52E-08       | 1.11E-02  | 44.99750532         | 3.98071E-09 |
|-----|------------------|---------------------|-----------|-----------|------------|-----------|----------------|-----------|---------------------|-------------|
| 6   | GeneID:100189189 | <i>TRNAQ16</i>      | 27487308  | 27487379  | rs34573979 | 27480526  | 1.37E-08       | 1.25E-02  | 44.97578414         | 4.02232E-09 |
| 6   | GeneID:8344      | <i>HIST1H2BE</i>    | 26184024  | 26184458  | rs67575965 | 26196593  | 3.65E-09       | 4.72E-02  | 44.96493179         | 4.04327E-09 |
| 6   | GeneID:100532732 | <i>MSH5-C6orf26</i> | 31707725  | 31732627  | rs3130484  | 31715882  | 1.80E-07       | 9.69E-04  | 44.9440735          | 4.08384E-09 |
| 6   | GeneID:100147813 | <i>RNU7-26P</i>     | 27865284  | 27865343  | rs61742093 | 27879982  | 3.01E-08       | 5.98E-03  | 44.87495205         | 4.22123E-09 |
| 6   | GeneID:222701    | <i>ZNF192P2</i>     | 28155716  | 28157189  | rs13195291 | 28169241  | 2.82E-08       | 6.64E-03  | 44.79672769         | 4.38228E-09 |
| 3   | GeneID:100302112 | <i>MIR1284</i>      | 71591121  | 71591240  | rs7610856  | 71579022  | 1.79E-07       | 1.17E-03  | 44.57940622         | 4.8626E-09  |
| 12  | GeneID:84329     | <i>HVCN1</i>        | 111086491 | 111127617 | rs7961345  | 111081598 | 5.07E-09       | 4.13E-02  | 44.57133827         | 4.88141E-09 |
| 6   | GeneID:81697     | <i>OR2B2</i>        | 27878963  | 27880174  | rs13218875 | 27884012  | 2.53E-08       | 8.91E-03  | 44.42622359         | 5.23241E-09 |
| 6   | GeneID:80345     | <i>ZSCAN16</i>      | 28092387  | 28097857  | rs66886492 | 28089731  | 2.04E-08       | 1.20E-02  | 44.26131003         | 5.66196E-09 |
| 6   | GeneID:346157    | <i>ZNF391</i>       | 27356524  | 27369227  | rs67859638 | 27357978  | 9.49E-09       | 2.60E-02  | 44.24507825         | 5.70609E-09 |
| 6   | GeneID:81695     | <i>OR2B7P</i>       | 28014213  | 28015147  | rs13193295 | 28003228  | 2.28E-08       | 1.17E-02  | 44.08456237         | 6.16147E-09 |
| 6   | GeneID:721       | <i>C4B</i>          | 31982572  | 32003195  | rs433061   | 32014828  | 7.56E-08       | 3.54E-03  | 44.08220522         | 6.16842E-09 |
| 6   | GeneID:100302242 | <i>MIR1236</i>      | 31924616  | 31924717  | rs1270942  | 31918860  | 9.34E-08       | 2.89E-03  | 44.06344085         | 6.22403E-09 |
| 6   | GeneID:8348      | <i>HIST1H2BO</i>    | 27861203  | 27861669  | rs13199649 | 27868792  | 3.24E-08       | 8.77E-03  | 43.9612995          | 6.53563E-09 |
| 6   | GeneID:8336      | <i>HIST1H2AM</i>    | 27860477  | 27860963  | rs13199649 | 27868792  | 3.25E-08       | 8.78E-03  | 43.95582375         | 6.55277E-09 |
| 6   | GeneID:340192    | <i>IQCB2P</i>       | 27978329  | 27980680  | rs71559067 | 27994416  | 2.46E-08       | 1.19E-02  | 43.91189074         | 6.6919E-09  |
| 6   | GeneID:7936      | <i>RDBP</i>         | 31919864  | 31926864  | rs1270942  | 31918860  | 9.86E-08       | 3.05E-03  | 43.84867417         | 6.89728E-09 |
| 6   | GeneID:100507173 | <i>LOC100507173</i> | 27661814  | 27678001  | rs13217620 | 27653120  | 3.93E-08       | 7.85E-03  | 43.8014694          | 7.05474E-09 |
| 6   | GeneID:8356      | <i>HIST1H3J</i>     | 27858093  | 27858570  | rs13199649 | 27868792  | 3.41E-08       | 9.22E-03  | 43.7605625          | 7.19409E-09 |
| 6   | GeneID:221584    | <i>ZSCAN12P1</i>    | 28058929  | 28063493  | rs35952432 | 28074901  | 2.42E-08       | 1.34E-02  | 43.70552731         | 7.38591E-09 |
| 11  | GeneID:10978     | <i>CLP1</i>         | 57425216  | 57429337  | rs527528   | 57433327  | 3.03E-06       | 1.09E-04  | 43.66510165         | 7.53005E-09 |
| 6   | GeneID:629       | <i>CFB</i>          | 31913721  | 31919861  | rs1270942  | 31918860  | 1.06E-07       | 3.27E-03  | 43.56885874         | 7.88462E-09 |
| 6   | GeneID:65944     | <i>OR2B8P</i>       | 28020906  | 28022043  | rs13200214 | 28017250  | 2.81E-08       | 1.24E-02  | 43.56303624         | 7.9066E-09  |
| 6   | GeneID:23540     | <i>TRNAS3</i>       | 27473607  | 27473688  | rs34573979 | 27480526  | 1.14E-08       | 3.05E-02  | 43.56105622         | 7.91408E-09 |
| 6   | GeneID:4277      | <i>MICB</i>         | 31465855  | 31478901  | rs3130614  | 31476458  | 3.17E-07       | 1.10E-03  | 43.5559164          | 7.93355E-09 |
| 6   | GeneID:100189292 | <i>TRNAD14</i>      | 27471523  | 27471594  | rs34573979 | 27480526  | 1.16E-08       | 3.12E-02  | 43.46842718         | 8.27239E-09 |
| 6   | GeneID:81694     | <i>OR2W2P</i>       | 28001693  | 28002640  | rs13193295 | 28003228  | 2.23E-08       | 1.75E-02  | 43.33201958         | 8.82971E-09 |
| Chr | Gene.id          | Name                | Start     | End       | SNP.id     | SNP.pos   | pval(headache) | pval(fT4) | X <sup>2</sup> ,4df | FCP         |

| 6   | GeneID:100189247 | <i>TRNAS19</i>      | 27470818 | 27470899 | rs34573979 | 27480526 | 1.22E-08       | 3.28E-02  | 43.27494202         | 9.07389E-09 |
|-----|------------------|---------------------|----------|----------|------------|----------|----------------|-----------|---------------------|-------------|
| 6   | GeneID:23437     | <i>TRNAS2</i>       | 27463593 | 27463674 | rs58616630 | 27474715 | 1.23E-08       | 3.29E-02  | 43.24874921         | 9.18819E-09 |
| 6   | GeneID:100129195 | <i>LOC100129195</i> | 28058336 | 28105071 | rs35749575 | 28114818 | 2.49E-08       | 1.67E-02  | 43.20669813         | 9.3747E-09  |
| 6   | GeneID:7745      | <i>ZNF192</i>       | 28109716 | 28125236 | rs35749575 | 28114818 | 2.60E-08       | 1.63E-02  | 43.16607119         | 9.55848E-09 |
| 6   | GeneID:692233    | <i>SNORD117</i>     | 31504151 | 31504226 | rs9267488  | 31514247 | 4.99E-07       | 8.95E-04  | 43.05748257         | 1.00675E-08 |
| 6   | GeneID:6499      | <i>SKIV2L</i>       | 31926581 | 31937532 | rs1270942  | 31918860 | 1.21E-07       | 3.74E-03  | 43.03242741         | 1.01888E-08 |
| 6   | GeneID:7718      | <i>ZNF165</i>       | 28048482 | 28057341 | rs34166054 | 28065801 | 4.18E-08       | 1.30E-02  | 42.67100716         | 1.21089E-08 |
| 6   | GeneID:7212      | <i>TRNAM2</i>       | 27745664 | 27745735 | rs35037868 | 27759115 | 5.36E-08       | 1.04E-02  | 42.61803095         | 1.24192E-08 |
| 15  | GeneID:9728      | <i>SECISBP2L</i>    | 49280835 | 49338760 | rs7183756  | 49307027 | 4.56E-05       | 1.24E-05  | 42.59104539         | 1.25803E-08 |
| 6   | GeneID:7741      | <i>ZNF187</i>       | 28234788 | 28245981 | rs13208096 | 28225311 | 4.30E-08       | 1.39E-02  | 42.47568032         | 1.32928E-08 |
| 6   | GeneID:1388      | <i>ATF6B</i>        | 32083045 | 32096017 | rs1269852  | 32080191 | 8.28E-08       | 7.45E-03  | 42.41252749         | 1.36997E-08 |
| 6   | GeneID:8363      | <i>HIST1H4J</i>     | 27791903 | 27792258 | rs35202262 | 27799514 | 9.75E-08       | 6.50E-03  | 42.35958154         | 1.40505E-08 |
| 6   | GeneID:100189214 | <i>TRNAQ17</i>      | 27759135 | 27759206 | rs35037868 | 27759115 | 5.74E-08       | 1.11E-02  | 42.34396696         | 1.41556E-08 |
| 6   | GeneID:8368      | <i>HIST1H4L</i>     | 27840926 | 27841289 | rs45509595 | 27840926 | 7.42E-08       | 8.64E-03  | 42.33451143         | 1.42197E-08 |
| 6   | GeneID:1589      | <i>CYP21A2</i>      | 32006093 | 32009447 | rs433061   | 32014828 | 1.18E-07       | 5.51E-03  | 42.31431631         | 1.43574E-08 |
| 6   | GeneID:692199    | <i>SNORD84</i>      | 31508878 | 31508955 | rs9267488  | 31514247 | 6.18E-07       | 1.11E-03  | 42.20455251         | 1.51299E-08 |
| 6   | GeneID:100129755 | <i>RSL24D1P1</i>    | 27748462 | 27748890 | rs35037868 | 27759115 | 5.96E-08       | 1.15E-02  | 42.19834039         | 1.51748E-08 |
| 6   | GeneID:8354      | <i>HIST1H3I</i>     | 27839623 | 27840099 | rs45509595 | 27840926 | 7.69E-08       | 8.96E-03  | 42.19038514         | 1.52325E-08 |
| 6   | GeneID:8362      | <i>HIST1H4K</i>     | 27798952 | 27799305 | rs35202262 | 27799514 | 1.07E-07       | 6.51E-03  | 42.17501546         | 1.53447E-08 |
| 6   | GeneID:10337     | <i>HIST1H4PS1</i>   | 27774945 | 27775115 | rs13195728 | 27771106 | 1.19E-07       | 6.03E-03  | 42.11342178         | 1.58026E-08 |
| 6   | GeneID:8329      | <i>HIST1H2AI</i>    | 27775977 | 27776445 | rs13195728 | 27771106 | 1.19E-07       | 6.05E-03  | 42.10309658         | 1.58806E-08 |
| 6   | GeneID:442179    | <i>ORIF12</i>       | 28041026 | 28042002 | rs71559070 | 28038929 | 4.13E-08       | 1.75E-02  | 42.09907188         | 1.59112E-08 |
| 6   | GeneID:25803     | <i>SPDEF</i>        | 34505580 | 34524091 | rs2233630  | 34524778 | 5.47E-04       | 1.32E-06  | 42.09239211         | 1.5962E-08  |
| 6   | GeneID:100507241 | <i>LOC100507241</i> | 28046570 | 28048908 | rs35902873 | 28058949 | 4.16E-08       | 1.84E-02  | 41.97660163         | 1.6869E-08  |
| 6   | GeneID:8340      | <i>HIST1H2BL</i>    | 27775257 | 27775709 | rs13195728 | 27771106 | 1.24E-07       | 6.31E-03  | 41.93532867         | 1.72045E-08 |
| 6   | GeneID:8357      | <i>HIST1H3H</i>     | 27777842 | 27778314 | rs13195728 | 27771106 | 1.24E-07       | 6.31E-03  | 41.93275671         | 1.72257E-08 |
| 6   | GeneID:8342      | <i>HIST1H2BM</i>    | 27782822 | 27783267 | rs13195728 | 27771106 | 1.25E-07       | 6.36E-03  | 41.89845158         | 1.751E-08   |
| 6   | GeneID:717       | <i>C2</i>           | 31868776 | 31913449 | rs1270942  | 31918860 | 1.61E-07       | 5.00E-03  | 41.877506           | 1.76859E-08 |
| Chr | Gene.id          | Name                | Start    | End      | SNP.id     | SNP.pos  | pval(headache) | pval(fT4) | X <sup>2</sup> ,4df | FCP         |

| 6   | GeneID:534       | <i>ATP6V1G2</i>        | 31512228  | 31514625  | rs9267488   | 31514247  | 6.81E-07       | 1.22E-03  | 41.81415812         | 1.82287E-08 |
|-----|------------------|------------------------|-----------|-----------|-------------|-----------|----------------|-----------|---------------------|-------------|
| 6   | GeneID:8331      | <i>HIST1H2AJ</i>       | 27782080  | 27782518  | rs13195728  | 27771106  | 1.28E-07       | 6.51E-03  | 41.8074963          | 1.82867E-08 |
| 6   | GeneID:84547     | <i>PGBD1</i>           | 28249314  | 28270326  | rs33932084  | 28268824  | 2.88E-08       | 2.97E-02  | 41.75872933         | 1.87172E-08 |
| 12  | GeneID:5501      | <i>PPP1CC</i>          | 111157613 | 111180783 | rs73194035  | 111165793 | 2.98E-08       | 3.04E-02  | 41.64916536         | 1.97217E-08 |
| 6   | GeneID:100532737 | <i>ATP6V1G2-DDX39B</i> | 31497996  | 31514625  | rs9267488   | 31514247  | 7.28E-07       | 1.31E-03  | 41.54925204         | 2.06845E-08 |
| 6   | GeneID:64288     | <i>ZNF323</i>          | 28292514  | 28324048  | rs13214023  | 28332141  | 4.60E-08       | 2.44E-02  | 41.21203639         | 2.42938E-08 |
| 6   | GeneID:4795      | <i>NFKBIL1</i>         | 31514628  | 31526606  | rs9267488   | 31514247  | 8.25E-07       | 1.48E-03  | 41.04449288         | 2.63141E-08 |
| 6   | GeneID:791230    | <i>TRNAV7</i>          | 27721179  | 27721251  | rs17693963  | 27710165  | 9.89E-08       | 1.25E-02  | 41.02108607         | 2.66094E-08 |
| 6   | GeneID:100288742 | <i>HIST1H2BPS1</i>     | 25732012  | 25732391  | rs11751622  | 25742888  | 4.46E-02       | 2.88E-08  | 40.94779191         | 2.75557E-08 |
| 6   | GeneID:100131289 | <i>LOC100131289</i>    | 27729523  | 27730966  | rs35501037  | 27739566  | 1.25E-07       | 1.05E-02  | 40.90257778         | 2.8156E-08  |
| 6   | GeneID:100189074 | <i>TRNAQ10</i>         | 27763640  | 27763711  | rs35037868  | 27759115  | 5.76E-08       | 2.32E-02  | 40.8700275          | 2.85963E-08 |
| 6   | GeneID:100189390 | <i>TRNAK31</i>         | 27543846  | 27543918  | rs10484399  | 27534528  | 3.56E-08       | 3.84E-02  | 40.82118503         | 2.92699E-08 |
| 6   | GeneID:100379623 | <i>LOC100379623</i>    | 26164261  | 26168404  | rs17598658  | 26175866  | 5.03E-08       | 2.83E-02  | 40.74134211         | 3.04052E-08 |
| 6   | GeneID:100189436 | <i>TRNAW9</i>          | 26319330  | 26319401  | rs34107459  | 26328353  | 6.62E-08       | 2.47E-02  | 40.46623186         | 3.46644E-08 |
| 11  | GeneID:280636    | <i>C11orf31</i>        | 57508722  | 57510883  | rs9420      | 57510294  | 2.00E-06       | 8.65E-04  | 40.35438692         | 3.65616E-08 |
| 6   | GeneID:100189410 | <i>TRNAR28</i>         | 26323046  | 26323118  | rs34107459  | 26328353  | 6.81E-08       | 2.54E-02  | 40.34952251         | 3.66464E-08 |
| 11  | GeneID:81156     | <i>OR9I2P</i>          | 57912321  | 57912806  | rs143742976 | 57923874  | 4.83E-08       | 3.94E-02  | 40.15834997         | 4.01401E-08 |
| 6   | GeneID:7148      | <i>TNXB</i>            | 32008932  | 32077151  | rs1269852   | 32080191  | 1.76E-07       | 1.10E-02  | 40.1298936          | 4.06878E-08 |
| 6   | GeneID:3009      | <i>HIST1H1B</i>        | 27834570  | 27835359  | rs45509595  | 27840926  | 6.54E-08       | 2.97E-02  | 40.1179392          | 4.09202E-08 |
| 6   | GeneID:100189094 | <i>TRNAM6</i>          | 26313352  | 26313423  | rs34107459  | 26328353  | 7.30E-08       | 2.72E-02  | 40.07309059         | 4.18036E-08 |
| 6   | GeneID:100189430 | <i>TRNAS27</i>         | 26312824  | 26312905  | rs13220522  | 26316295  | 8.50E-08       | 2.46E-02  | 39.9728059          | 4.38484E-08 |
| 14  | GeneID:3705      | <i>ITPK1</i>           | 93403259  | 93582263  | rs28540738  | 93591673  | 1.85E-05       | 1.18E-04  | 39.8967508          | 4.54654E-08 |
| 6   | GeneID:100189185 | <i>TRNAQ15</i>         | 26311975  | 26312046  | rs13220522  | 26316295  | 8.37E-08       | 2.71E-02  | 39.80906659         | 4.74036E-08 |
| 6   | GeneID:100189321 | <i>TRNAQ25</i>         | 26311424  | 26311495  | rs13220522  | 26316295  | 8.37E-08       | 2.71E-02  | 39.80881924         | 4.74092E-08 |
| 6   | GeneID:10340     | <i>HIST1H2BPS2</i>     | 27831840  | 27832179  | rs45509595  | 27840926  | 6.55E-08       | 3.47E-02  | 39.80176277         | 4.75687E-08 |
| 6   | GeneID:100189101 | <i>TRNAV15</i>         | 27696327  | 27696399  | rs34409918  | 27685348  | 7.97E-08       | 2.88E-02  | 39.78222466         | 4.80133E-08 |
| 6   | GeneID:100189382 | <i>TRNAS25</i>         | 26327817  | 26327898  | rs9467714   | 26340785  | 6.66E-08       | 3.45E-02  | 39.78205797         | 4.80171E-08 |
| 6   | GeneID:8332      | <i>HIST1H2AL</i>       | 27833107  | 27833576  | rs45509595  | 27840926  | 6.69E-08       | 3.49E-02  | 39.75121253         | 4.87274E-08 |
| Chr | Gene.id          | Name                   | Start     | End       | SNP.id      | SNP.pos   | pval(headache) | pval(fT4) | X <sup>2</sup> ,4df | FCP         |

| 6   | GeneID:100189374 | <i>TRNAT18</i>      | 27694473  | 27694546  | rs34409918  | 27685348  | 8.14E-08       | 2.95E-02  | 39.69641891         | 5.00151E-08 |
|-----|------------------|---------------------|-----------|-----------|-------------|-----------|----------------|-----------|---------------------|-------------|
| 6   | GeneID:100507025 | <i>LOC100507025</i> | 26281278  | 26285763  | rs55706012  | 26266311  | 8.39E-08       | 2.87E-02  | 39.69274177         | 5.01027E-08 |
| 6   | GeneID:8341      | <i>HIST1H2BN</i>    | 27806440  | 27806888  | rs35202262  | 27799514  | 1.04E-07       | 2.38E-02  | 39.64161865         | 5.13369E-08 |
| 6   | GeneID:8330      | <i>HIST1H2AK</i>    | 27805658  | 27806117  | rs35202262  | 27799514  | 1.04E-07       | 2.38E-02  | 39.64127686         | 5.13452E-08 |
| 6   | GeneID:100189164 | <i>TRNAL16</i>      | 27688898  | 27688980  | rs34409918  | 27685348  | 8.38E-08       | 2.97E-02  | 39.6232909          | 5.17867E-08 |
| 6   | GeneID:8355      | <i>HIST1H3G</i>     | 26271146  | 26271612  | rs55706012  | 26266311  | 8.71E-08       | 2.98E-02  | 39.54095078         | 5.38565E-08 |
| 6   | GeneID:8346      | <i>HIST1H2BI</i>    | 26273204  | 26273640  | rs55706012  | 26266311  | 8.86E-08       | 3.03E-02  | 39.47365278         | 5.56093E-08 |
| 6   | GeneID:8333      | <i>HIST1H2APS4</i>  | 26272421  | 26272768  | rs55706012  | 26266311  | 8.90E-08       | 3.04E-02  | 39.45563345         | 5.60882E-08 |
| 6   | GeneID:100189396 | <i>TRNAR26</i>      | 26328368  | 26328440  | rs9467714   | 26340785  | 7.24E-08       | 3.75E-02  | 39.44714649         | 5.63152E-08 |
| 6   | GeneID:3017      | <i>HIST1H2BD</i>    | 26158349  | 26171577  | rs17598658  | 26175866  | 7.00E-08       | 3.93E-02  | 39.42056318         | 5.70321E-08 |
| 6   | GeneID:100189040 | <i>TRNAM4</i>       | 26330529  | 26330600  | rs9467714   | 26340785  | 7.62E-08       | 3.95E-02  | 39.24453468         | 6.20146E-08 |
| 6   | GeneID:394254    | <i>GPR89P</i>       | 27704354  | 27706293  | rs13202291  | 27698857  | 1.10E-07       | 2.76E-02  | 39.21324805         | 6.29446E-08 |
| 6   | GeneID:100189048 | <i>TRNAW2</i>       | 26331672  | 26331743  | rs9467714   | 26340785  | 7.81E-08       | 4.05E-02  | 39.14104653         | 6.51441E-08 |
| 11  | GeneID:100507231 | <i>LOC100507231</i> | 57485518  | 57486002  | rs547891    | 57499065  | 2.13E-06       | 1.57E-03  | 39.02957824         | 6.86913E-08 |
| 6   | GeneID:3106      | <i>HLA-B</i>        | 31321649  | 31324989  | rs2523589   | 31327334  | 2.69E-04       | 1.31E-05  | 38.92951275         | 7.20394E-08 |
| 6   | GeneID:729816    | <i>DHFRP2</i>       | 31331244  | 31334742  | rs2523589   | 31327334  | 2.69E-04       | 1.31E-05  | 38.92951275         | 7.20394E-08 |
| 11  | GeneID:643376    | <i>BTBD18</i>       | 57510986  | 57519253  | rs9420      | 57510294  | 2.94E-06       | 1.27E-03  | 38.80587454         | 7.64019E-08 |
| 6   | GeneID:100189218 | <i>TRNAS16</i>      | 26305718  | 26305801  | rs13220522  | 26316295  | 1.04E-07       | 3.91E-02  | 38.63784709         | 8.27559E-08 |
| 1   | GeneID:100418820 | <i>PHBP12</i>       | 51246012  | 51246821  | rs1416685   | 51243374  | 8.72E-05       | 4.79E-05  | 38.58579063         | 8.48293E-08 |
| 6   | GeneID:8345      | <i>HIST1H2BH</i>    | 26251879  | 26252303  | rs55706012  | 26266311  | 9.40E-08       | 4.66E-02  | 38.49293472         | 8.86573E-08 |
| 1   | GeneID:2029      | <i>ENSA</i>         | 150594599 | 150602098 | rs138520356 | 150586501 | 4.19E-06       | 1.11E-03  | 38.36588644         | 9.41755E-08 |
| 6   | GeneID:7232      | <i>TRNAR3</i>       | 26299905  | 26299977  | rs10484439  | 26309908  | 1.20E-07       | 4.00E-02  | 38.31223319         | 9.66076E-08 |
| 11  | GeneID:390183    | <i>RPS4XP13</i>     | 57343702  | 57344578  | rs184391280 | 57350423  | 8.32E-07       | 7.50E-03  | 37.78537789         | 1.2408E-07  |
| 1   | GeneID:100271104 | <i>RPS26P12</i>     | 174891238 | 174891571 | rs4650666   | 174880809 | 4.13E-05       | 1.83E-04  | 37.4058124          | 1.4858E-07  |
| 1   | GeneID:100128889 | <i>LOC100128889</i> | 174818808 | 174819306 | rs1894200   | 174811177 | 7.80E-05       | 1.10E-04  | 37.14517347         | 1.68142E-07 |
| 18  | GeneID:342784    | <i>LOC342784</i>    | 57863787  | 57865406  | rs476828    | 57852587  | 5.59E-03       | 1.78E-06  | 36.8486392          | 1.93538E-07 |
| 9   | GeneID:58499     | <i>ZNF462</i>       | 109625378 | 109773807 | rs2134063   | 109695139 | 1.13E-04       | 9.68E-05  | 36.65345325         | 2.12306E-07 |
| 11  | GeneID:1500      | <i>CTNND1</i>       | 57529234  | 57586652  | rs3781885   | 57570680  | 6.11E-06       | 1.90E-03  | 36.54550347         | 2.23454E-07 |
| Chr | Gene.id          | Name                | Start     | End       | SNP.id      | SNP.pos   | pval(headache) | pval(fT4) | X <sup>2</sup> ,4df | FCP         |



| 6   | GeneID:100131913 | <i>RPL5P20</i>      | 19348341  | 19349350  | rs113153854 | 19343431  | 5.42E-03       | 2.14E-06  | 36.53979201         | 2.2406E-07  |
|-----|------------------|---------------------|-----------|-----------|-------------|-----------|----------------|-----------|---------------------|-------------|
| 1   | GeneID:359781    | <i>MRPS6P2</i>      | 51312141  | 51312514  | rs6684901   | 51298828  | 1.90E-04       | 6.46E-05  | 36.4296626          | 2.36067E-07 |
| 3   | GeneID:100506815 | <i>FOXP1-IT1</i>    | 71619425  | 71623608  | rs62244889  | 71609007  | 5.07E-06       | 2.61E-03  | 36.27913631         | 2.53523E-07 |
| 1   | GeneID:646891    | <i>SDCCAG3P2</i>    | 175013765 | 175014848 | rs16865298  | 175013165 | 6.50E-03       | 2.06E-06  | 36.25803859         | 2.56071E-07 |
| 6   | GeneID:29993     | <i>PACSL1</i>       | 34433853  | 34504039  | rs12202516  | 34490146  | 1.14E-02       | 1.22E-06  | 36.19647163         | 2.63651E-07 |
| 1   | GeneID:100422535 | <i>LOC100422535</i> | 50871104  | 50871696  | rs2484680   | 50868417  | 6.30E-06       | 2.43E-03  | 35.99052496         | 2.90671E-07 |
| 15  | GeneID:729344    | <i>KRT8P24</i>      | 49263922  | 49265761  | rs4775791   | 49278326  | 3.66E-04       | 4.27E-05  | 35.94954632         | 2.96368E-07 |
| 6   | GeneID:29113     | <i>C6orf15</i>      | 31079000  | 31080332  | rs2233980   | 31079644  | 7.76E-07       | 2.17E-02  | 35.79777291         | 3.18455E-07 |
| 1   | GeneID:100129919 | <i>HMGB1P45</i>     | 50864534  | 50865042  | rs2484680   | 50868417  | 6.78E-06       | 2.62E-03  | 35.69419309         | 3.34464E-07 |
| 11  | GeneID:23360     | <i>FNBP4</i>        | 47738069  | 47788993  | rs55944135  | 47792469  | 1.79E-02       | 1.00E-06  | 35.67018193         | 3.38288E-07 |
| 9   | GeneID:266655    | <i>LINC00094</i>    | 136890561 | 136896719 | rs36093130  | 136906986 | 8.79E-03       | 2.61E-06  | 35.18042573         | 4.26532E-07 |
| 6   | GeneID:1041      | <i>CDSN</i>         | 31082865  | 31088252  | rs2233980   | 31079644  | 9.12E-07       | 2.55E-02  | 35.15210359         | 4.32286E-07 |
| 1   | GeneID:63950     | <i>DMRTA2</i>       | 50883223  | 50889119  | rs2484680   | 50868417  | 6.71E-06       | 3.80E-03  | 34.97116892         | 4.70913E-07 |
| 11  | GeneID:23279     | <i>NUP160</i>       | 47799670  | 47870057  | rs55944135  | 47792469  | 1.77E-02       | 1.50E-06  | 34.89703868         | 4.87715E-07 |
| 15  | GeneID:100131797 | <i>RPL15P19</i>     | 49469498  | 49470980  | rs34854443  | 49475296  | 3.95E-03       | 6.88E-06  | 34.84004032         | 5.01039E-07 |
| 6   | GeneID:100507444 | <i>PPP1R2P1</i>     | 32844255  | 32847851  | rs115591082 | 32844103  | 3.22E-06       | 8.76E-03  | 34.76938447         | 5.1806E-07  |
| 6   | GeneID:55604     | <i>LRRC16A</i>      | 25279656  | 25620758  | rs927985    | 25412811  | 1.91E-06       | 1.63E-02  | 34.57036065         | 5.69168E-07 |
| 11  | GeneID:10658     | <i>CELF1</i>        | 47487489  | 47574792  | rs72907976  | 47566232  | 1.52E-02       | 2.05E-06  | 34.56137114         | 5.71592E-07 |
| 1   | GeneID:11124     | <i>FAF1</i>         | 50906935  | 51425936  | rs1278519   | 50897342  | 1.19E-04       | 2.70E-04  | 34.50226634         | 5.87784E-07 |
| 15  | GeneID:9318      | <i>COPS2</i>        | 49417471  | 49447854  | rs12439497  | 49406214  | 1.39E-03       | 2.78E-05  | 34.1320639          | 7.00131E-07 |
| 3   | GeneID:27086     | <i>FOXP1</i>        | 71004736  | 71633140  | rs7610856   | 71579022  | 4.36E-06       | 9.01E-03  | 34.10538492         | 7.09009E-07 |
| 6   | GeneID:170679    | <i>PSORS1C1</i>     | 31082608  | 31107869  | rs2233980   | 31079644  | 1.19E-06       | 3.32E-02  | 34.09625222         | 7.12074E-07 |
| 14  | GeneID:1531      | <i>CYB5AP3</i>      | 93604300  | 93605122  | rs28540738  | 93591673  | 5.50E-06       | 7.31E-03  | 34.05717621         | 7.25337E-07 |
| 1   | GeneID:100270975 | <i>RPL30P1</i>      | 174059272 | 174059610 | rs12563301  | 174060062 | 8.85E-05       | 4.63E-04  | 34.02027782         | 7.38087E-07 |
| 1   | GeneID:405       | <i>ARNT</i>         | 150782181 | 150849244 | rs150253674 | 150788065 | 2.28E-05       | 1.97E-03  | 33.83831505         | 8.04305E-07 |
| 11  | GeneID:10335     | <i>MRVII</i>        | 10594638  | 10715535  | rs4909945   | 10673739  | 1.83E-06       | 2.52E-02  | 33.78005599         | 8.26733E-07 |
| 9   | GeneID:100130548 | <i>LOC100130548</i> | 136919412 | 136924237 | rs36093130  | 136906986 | 9.52E-03       | 5.19E-06  | 33.64400146         | 8.81565E-07 |
| 1   | GeneID:63931     | <i>MRPS14</i>       | 174982094 | 174992591 | rs6662806   | 175006747 | 1.98E-02       | 2.61E-06  | 33.55929659         | 9.17518E-07 |
| Chr | Gene.id          | Name                | Start     | End       | SNP.id      | SNP.pos   | pval(headache) | pval(fT4) | X <sup>2</sup> ,4df | FCP         |

|    |                  |                     |           |           |             |           |          |          |             |             |
|----|------------------|---------------------|-----------|-----------|-------------|-----------|----------|----------|-------------|-------------|
| 11 | GeneID:283193    | <i>OR5AZ1P</i>      | 57684774  | 57685702  | rs641325    | 57681828  | 9.00E-05 | 6.20E-04 | 33.40187313 | 9.88261E-07 |
| 13 | GeneID:2835      | <i>GPR12</i>        | 27329337  | 27334922  | rs76623956  | 27344759  | 1.05E-04 | 5.74E-04 | 33.25009801 | 1.06161E-06 |
| 11 | GeneID:219965    | <i>OR5B17</i>       | 58125598  | 58126542  | rs118138203 | 58135935  | 2.64E-06 | 2.51E-02 | 33.06051983 | 1.16088E-06 |
| 1  | GeneID:100302291 | <i>LOC100302291</i> | 174329634 | 174337240 | rs2049991   | 174325566 | 1.21E-04 | 5.69E-04 | 32.97949674 | 1.20608E-06 |
| 11 | GeneID:648315    | <i>VN2R9P</i>       | 57808240  | 57834431  | rs140301686 | 57824505  | 3.55E-06 | 2.00E-02 | 32.92686711 | 1.23638E-06 |
| 9  | GeneID:169792    | <i>GLIS3</i>        | 3824128   | 4300035   | rs118047658 | 3860001   | 2.61E-02 | 2.76E-06 | 32.89436174 | 1.25547E-06 |
| 11 | GeneID:100420122 | <i>LOC100420122</i> | 58121463  | 58121972  | rs118138203 | 58135935  | 2.60E-06 | 2.99E-02 | 32.74076798 | 1.34971E-06 |
| 11 | GeneID:8501      | <i>SLC43A1</i>      | 57252004  | 57283192  | rs76642542  | 57290061  | 7.08E-06 | 1.11E-02 | 32.72044041 | 1.36271E-06 |
| 11 | GeneID:401692    | <i>OR5B1P</i>       | 58133394  | 58134041  | rs118138203 | 58135935  | 3.13E-06 | 2.98E-02 | 32.37305557 | 1.60498E-06 |
| 15 | GeneID:2585      | <i>GALK2</i>        | 49447976  | 49622002  | rs11631782  | 49542284  | 4.19E-03 | 2.24E-05 | 32.3669484  | 1.6096E-06  |
| 1  | GeneID:9909      | <i>DENND4B</i>      | 153901977 | 153919154 | rs12033532  | 153888820 | 3.76E-06 | 2.75E-02 | 32.16745652 | 1.76811E-06 |
| 1  | GeneID:100422536 | <i>LOC100422536</i> | 243430920 | 243431421 | rs12741781  | 243428152 | 2.91E-06 | 3.98E-02 | 31.94192575 | 1.9661E-06  |
| 6  | GeneID:5698      | <i>PSMB9</i>        | 32821938  | 32827628  | rs45506201  | 32808299  | 4.07E-06 | 2.85E-02 | 31.93709037 | 1.97058E-06 |
| 12 | GeneID:84260     | <i>TCHP</i>         | 110338079 | 110355874 | rs116940627 | 110336546 | 2.60E-06 | 4.73E-02 | 31.82389912 | 2.07836E-06 |

Chr, chromosome number; Gene.id, Gene ID; Name, Gene; Start, start point of the gene; End, end point of the gene; SNP.id, top SNP associated with the gene; SNP.pos, position of the top SNP; pval(headache), p-value of the gene in headache dataset; pval(fT4), p-value of the gene in fT4 dataset.

**Supplementary Table S15.** Pathways associated with headache and hypothyroidism.

| source | term_name                            | term_id    | adjusted_p_value | negative_log10_of_adjusted_p_value | term_size | query_size | intersection_size | effective_domain_size | intersections                                                             |
|--------|--------------------------------------|------------|------------------|------------------------------------|-----------|------------|-------------------|-----------------------|---------------------------------------------------------------------------|
| GO:MF  | MHC class II protein complex binding | GO:0023026 | 1.07E-04         | 3.968940607                        | 25        | 225        | 6                 | 20183                 | <i>HLA-DQA1,HLA-DRB5,HLA-DOB,HLA-DMA,HLA-DRA,HLA-DMB</i>                  |
| GO:MF  | peptide antigen binding              | GO:0042605 | 6.24E-04         | 3.205148403                        | 33        | 225        | 6                 | 20183                 | <i>HLA-DQA1,HLA-DRB5,TAP1,HLA-DRA,HLA-E,HLA-G</i>                         |
| GO:MF  | MHC protein complex binding          | GO:0023023 | 6.24E-04         | 3.205148403                        | 33        | 225        | 6                 | 20183                 | <i>HLA-DQA1,HLA-DRB5,HLA-DOB,HLA-DMA,HLA-DRA,HLA-DMB</i>                  |
| GO:MF  | protein phosphatase binding          | GO:0019903 | 2.94E-03         | 2.531822053                        | 150       | 225        | 10                | 20183                 | <i>ENSA,STAT1,PPP1R10,PPP1R11,MFHAS1,PPP1R3B,MTMR9,PTK2,ANAPC7,PPP1CC</i> |

|       |                                                                                           |            |          |             |     |     |    |       |                                                                                              |
|-------|-------------------------------------------------------------------------------------------|------------|----------|-------------|-----|-----|----|-------|----------------------------------------------------------------------------------------------|
| GO:MF | phosphatase binding                                                                       | GO:0019902 | 5.06E-03 | 2.296262875 | 195 | 225 | 11 | 20183 | <i>ENSA,STAT1,PPP1R10,PPP1R11,MFHAS1,PPP1R3B,MTMR9,PTK2,ANAPC7,PPP1CC,MAPK1</i>              |
| GO:MF | MHC class II receptor activity                                                            | GO:0032395 | 2.96E-02 | 1.528392789 | 8   | 225 | 3  | 20183 | <i>HLA-DQA1,HLA-DOB,HLA-DRA</i>                                                              |
| GO:BP | peptide antigen assembly with MHC class II protein complex                                | GO:0002503 | 8.89E-06 | 5.051246559 | 14  | 232 | 6  | 21100 | <i>HLA-DQA1,HLA-DRB5,HLA-DOB,HLA-DMA,HLA-DRA,HLA-DMB</i>                                     |
| GO:BP | MHC class II protein complex assembly                                                     | GO:0002399 | 8.89E-06 | 5.051246559 | 14  | 232 | 6  | 21100 | <i>HLA-DQA1,HLA-DRB5,HLA-DOB,HLA-DMA,HLA-DRA,HLA-DMB</i>                                     |
| GO:BP | antigen processing and presentation                                                       | GO:0019882 | 3.49E-05 | 4.457607158 | 128 | 232 | 12 | 21100 | <i>HLA-DQA1,HLA-DQB1,HLA-DRB5,TAP1,HLA-DOB,HLA-DMA,HLA-DRA,HFE,HLA-DMB,HLA-E,HLA-G,RAB5B</i> |
| GO:BP | antigen processing and presentation of peptide antigen                                    | GO:0048002 | 4.38E-05 | 4.358404106 | 82  | 232 | 10 | 21100 | <i>HLA-DQA1,HLA-DRB5,TAP1,HLA-DOB,HLA-DMA,HLA-DRA,HFE,HLA-DMB,HLA-E,HLA-G</i>                |
| GO:BP | peptide antigen assembly with MHC protein complex                                         | GO:0002501 | 5.30E-05 | 4.27613376  | 18  | 232 | 6  | 21100 | <i>HLA-DQA1,HLA-DRB5,HLA-DOB,HLA-DMA,HLA-DRA,HLA-DMB</i>                                     |
| GO:BP | MHC protein complex assembly                                                              | GO:0002396 | 5.30E-05 | 4.27613376  | 18  | 232 | 6  | 21100 | <i>HLA-DQA1,HLA-DRB5,HLA-DOB,HLA-DMA,HLA-DRA,HLA-DMB</i>                                     |
| GO:BP | antigen processing and presentation of peptide or polysaccharide antigen via MHC class II | GO:0002504 | 2.17E-04 | 3.663172655 | 36  | 232 | 7  | 21100 | <i>HLA-DQA1,HLA-DQB1,HLA-DRB5,HLA-DOB,HLA-DMA,HLA-DRA,HLA-DMB</i>                            |
| GO:BP | antigen processing and presentation of exogenous peptide antigen                          | GO:0002478 | 4.98E-04 | 3.302574546 | 59  | 232 | 8  | 21100 | <i>HLA-DQA1,HLA-DRB5,TAP1,HLA-DOB,HLA-DMA,HLA-DRA,HLA-DMB,HLA-E</i>                          |
| GO:BP | antigen processing and presentation of exogenous peptide antigen via MHC class II         | GO:0019886 | 9.80E-04 | 3.00872805  | 28  | 232 | 6  | 21100 | <i>HLA-DQA1,HLA-DRB5,HLA-DOB,HLA-DMA,HLA-DRA,HLA-DMB</i>                                     |

|       |                                                                         |            |          |             |     |     |    |       |                                                                                                       |
|-------|-------------------------------------------------------------------------|------------|----------|-------------|-----|-----|----|-------|-------------------------------------------------------------------------------------------------------|
| GO:BP | antigen processing and presentation of exogenous antigen                | GO:0019884 | 1.91E-03 | 2.718546439 | 70  | 232 | 8  | 21100 | <i>HLA-DQA1,HLA-DRB5,TAP1,HLA-DOB,HLA-DMA,HLA-DRA,HLA-DMB,HLA-E</i>                                   |
| GO:BP | antigen processing and presentation of peptide antigen via MHC class II | GO:0002495 | 2.27E-03 | 2.643517444 | 32  | 232 | 6  | 21100 | <i>HLA-DQA1,HLA-DRB5,HLA-DOB,HLA-DMA,HLA-DRA,HLA-DMB</i>                                              |
| GO:BP | antigen processing and presentation of endogenous peptide antigen       | GO:0002483 | 3.04E-03 | 2.517796578 | 19  | 232 | 5  | 21100 | <i>TAP1,HLA-DRA,HFE,HLA-E,HLA-G</i>                                                                   |
| GO:BP | antigen processing and presentation of endogenous antigen               | GO:0019883 | 1.61E-02 | 1.792488139 | 26  | 232 | 5  | 21100 | <i>TAP1,HLA-DRA,HFE,HLA-E,HLA-G</i>                                                                   |
| GO:BP | negative regulation of cell-cell adhesion                               | GO:0022408 | 1.67E-02 | 1.777461143 | 190 | 232 | 11 | 21100 | <i>RUNX3,MUC21,HFE,HLA-G,PTK2,IFNA2,SPI1,SH2B3,TRPV4,CBFB,PTPN2</i>                                   |
| GO:BP | regulation of leukocyte cell-cell adhesion                              | GO:1903037 | 4.12E-02 | 1.385244886 | 334 | 232 | 14 | 21100 | <i>RUNX3,HLA-DQA1,HLA-DRB5,HLA-DOB,HLA-DMA,HLA-DRA,HFE,HLA-DMB,HLA-E,HLA-G,IFNA2,ZMIZ1,CBFB,PTPN2</i> |
| GO:CC | MHC protein complex                                                     | GO:0042611 | 6.79E-10 | 9.168301244 | 24  | 231 | 9  | 21698 | <i>HLA-DQA1,HLA-DQB1,HLA-DRB5,HLA-DOB,HLA-DMA,HLA-DRA,HLA-DMB,HLA-E,HLA-G</i>                         |
| GO:CC | MHC class II protein complex                                            | GO:0042613 | 9.98E-08 | 7.001018832 | 17  | 231 | 7  | 21698 | <i>HLA-DQA1,HLA-DQB1,HLA-DRB5,HLA-DOB,HLA-DMA,HLA-DRA,HLA-DMB</i>                                     |
| GO:CC | luminal side of endoplasmic reticulum membrane                          | GO:0098553 | 2.32E-03 | 2.63440666  | 25  | 231 | 5  | 21698 | <i>HLA-DQA1,HLA-DRB5,HLA-DRA,HLA-E,HLA-G</i>                                                          |
| GO:CC | integral component of luminal side of endoplasmic reticulum membrane    | GO:0071556 | 2.32E-03 | 2.63440666  | 25  | 231 | 5  | 21698 | <i>HLA-DQA1,HLA-DRB5,HLA-DRA,HLA-E,HLA-G</i>                                                          |
| GO:CC | luminal side of membrane                                                | GO:0098576 | 8.28E-03 | 2.082114665 | 32  | 231 | 5  | 21698 | <i>HLA-DQA1,HLA-DRB5,HLA-DRA,HLA-E,HLA-G</i>                                                          |

|       |                                     |            |          |             |     |     |    |       |                                                                                                                                       |
|-------|-------------------------------------|------------|----------|-------------|-----|-----|----|-------|---------------------------------------------------------------------------------------------------------------------------------------|
| GO:CC | DNA packaging complex               | GO:0044815 | 2.36E-02 | 1.627909516 | 200 | 231 | 10 | 21698 | <i>HIST1H2BN,HIST1H4J,HIST1H2BK,HIST1H2BJ,HIST1H2AC,HIST1H2BD,HIST1H2AB,SMARCC2,ACD,TOP3B</i>                                         |
| KEGG  | Autoimmune thyroid disease          | KEGG:05320 | 7.50E-09 | 8.125074215 | 49  | 112 | 11 | 7559  | <i>HLA-DQB1,HLA-DRB5,HLA-DOB,HLA-DMA,HLA-DRA,HLA-DMB,HLA-E,HLA-G,IFNA2,IFNA6,IFNA14</i>                                               |
| KEGG  | Systemic lupus erythematosus        | KEGG:05322 | 3.71E-08 | 7.430847613 | 127 | 112 | 15 | 7559  | <i>HLA-DQB1,HLA-DRB5,HLA-DOB,C4B,C4A,HLA-DMA,HLA-DRA,HIST1H2BN,HIST1H4J,HIST1H2BK,HIST1H2BJ,HIST1H2AC,HIST1H2BD,HIST1H2AB,HLA-DMB</i> |
| KEGG  | Antigen processing and presentation | KEGG:04612 | 2.65E-07 | 6.577198911 | 67  | 112 | 11 | 7559  | <i>HLA-DQB1,HLA-DRB5,TAP1,HLA-DOB,HSPA1L,HSPA1B,HLA-DMA,HLA-DRA,HLA-DMB,HLA-E,HLA-G</i>                                               |
| KEGG  | Type I diabetes mellitus            | KEGG:04940 | 4.16E-07 | 6.380743752 | 40  | 112 | 9  | 7559  | <i>HLA-DQB1,HLA-DRB5,HLA-DOB,LTA,HLA-DMA,HLA-DRA,HLA-DMB,HLA-E,HLA-G</i>                                                              |
| KEGG  | Toxoplasmosis                       | KEGG:05145 | 4.16E-07 | 6.380682943 | 107 | 112 | 13 | 7559  | <i>STAT1,NFKB1,HLA-DQB1,HLA-DRB5,HLA-DOB,HSPA1L,HSPA1B,HLA-DMA,HLA-DRA,HLA-DMB,PIK3R5,IFNGR2,MAPK1</i>                                |
| KEGG  | Influenza A                         | KEGG:05164 | 1.23E-06 | 5.911361394 | 163 | 112 | 15 | 7559  | <i>PIK3CD,STAT1,TLR3,NFKB1,HLA-DQB1,HLA-DRB5,HLA-DOB,HLA-DMA,HLA-DRA,HLA-DMB,IFNA2,IFNA6,IFNA14,IFNGR2,MAPK1</i>                      |
| KEGG  | Epstein-Barr virus infection        | KEGG:05169 | 1.50E-06 | 5.823230955 | 191 | 112 | 16 | 7559  | <i>RUNX3,PIK3CD,STAT1,NFKB1,HLA-DQB1,HLA-DRB5,TAP1,HLA-DOB,HLA-DMA,HLA-DRA,HLA-DMB,HLA-E,HLA-G,IFNA2,IFNA6,IFNA14</i>                 |
| KEGG  | Allograft rejection                 | KEGG:05330 | 2.14E-06 | 5.670327852 | 34  | 112 | 8  | 7559  | <i>HLA-DQB1,HLA-DRB5,HLA-DOB,HLA-DMA,HLA-DRA,HLA-DMB,HLA-E,HLA-G</i>                                                                  |
| KEGG  | Tuberculosis                        | KEGG:05152 | 2.76E-06 | 5.559561339 | 173 | 112 | 15 | 7559  | <i>STAT1,NFKB1,HLA-DQB1,HLA-DRB5,HLA-DOB,HLA-DMA,HLA-DRA,HLA-DMB,IFNA2,IFNA6,IFNA14,RAB5B,ATP6V0D1,IFNGR2,MAPK1</i>                   |

|      |                                              |            |          |             |     |     |    |      |                                                                                                                      |
|------|----------------------------------------------|------------|----------|-------------|-----|-----|----|------|----------------------------------------------------------------------------------------------------------------------|
| KEGG | Th1 and Th2 cell differentiation             | KEGG:04658 | 3.98E-06 | 5.399625617 | 86  | 112 | 11 | 7559 | <i>RUNX3,STAT1,NFKB1,HLA-DQB1,HLA-DRB5,HLA-DOB,HLA-DMA,HLA-DRA,HLA-DMB,IFNGR2,MAPK1</i>                              |
| KEGG | Graft-versus-host disease                    | KEGG:05332 | 4.38E-06 | 5.358706747 | 37  | 112 | 8  | 7559 | <i>HLA-DQB1,HLA-DRB5,HLA-DOB,HLA-DMA,HLA-DRA,HLA-DMB,HLA-E,HLA-G</i>                                                 |
| KEGG | Human T-cell leukemia virus 1 infection      | KEGG:05166 | 6.16E-06 | 5.210144683 | 211 | 112 | 16 | 7559 | <i>PIK3CD,NFKB1,HLA-DQB1,HLA-DRB5,HLA-DOB,ATF6B,LTA,HLA-DMA,HLA-DRA,HLA-DMB,HLA-E,HLA-G,IL15RA,SPI1,ANAPC7,MAPK1</i> |
| KEGG | Leishmaniasis                                | KEGG:05140 | 6.61E-06 | 5.179569274 | 71  | 112 | 10 | 7559 | <i>STAT1,NFKB1,HLA-DQB1,HLA-DRB5,HLA-DOB,HLA-DMA,HLA-DRA,HLA-DMB,IFNGR2,MAPK1</i>                                    |
| KEGG | Inflammatory bowel disease                   | KEGG:05321 | 2.04E-05 | 4.691129951 | 61  | 112 | 9  | 7559 | <i>STAT1,NFKB1,HLA-DQB1,HLA-DRB5,HLA-DOB,HLA-DMA,HLA-DRA,HLA-DMB,IFNGR2</i>                                          |
| KEGG | Phagosome                                    | KEGG:04145 | 6.54E-05 | 4.18411597  | 137 | 112 | 12 | 7559 | <i>HLA-DQB1,HLA-DRB5,TAP1,HLA-DOB,ATP6V1G2,HLA-DMA,HLA-DRA,HLA-DMB,HLA-E,HLA-G,RAB5B,ATP6V0D1</i>                    |
| KEGG | Viral carcinogenesis                         | KEGG:05203 | 7.98E-05 | 4.097812804 | 194 | 112 | 14 | 7559 | <i>PIK3CD,CCR8,NFKB1,ATF6B,HIST1H2BN,HIST1H4J,HIST1H2BK,HIST1H2BJ,HIST1H2BD,HLA-E,MRPS18B,HLA-G,ATP6V0D1,MAPK1</i>   |
| KEGG | Viral myocarditis                            | KEGG:05416 | 1.11E-04 | 3.956030035 | 55  | 112 | 8  | 7559 | <i>HLA-DQB1,HLA-DRB5,HLA-DOB,HLA-DMA,HLA-DRA,HLA-DMB,HLA-E,HLA-G</i>                                                 |
| KEGG | Asthma                                       | KEGG:05310 | 1.91E-04 | 3.719551312 | 27  | 112 | 6  | 7559 | <i>HLA-DQB1,HLA-DRB5,HLA-DOB,HLA-DMA,HLA-DRA,HLA-DMB</i>                                                             |
| KEGG | Th17 cell differentiation                    | KEGG:04659 | 2.49E-04 | 3.604557592 | 104 | 112 | 10 | 7559 | <i>STAT1,NFKB1,HLA-DQB1,HLA-DRB5,HLA-DOB,HLA-DMA,HLA-DRA,HLA-DMB,IFNGR2,MAPK1</i>                                    |
| KEGG | Intestinal immune network for IgA production | KEGG:04672 | 2.84E-04 | 3.546411226 | 44  | 112 | 7  | 7559 | <i>HLA-DQB1,HLA-DRB5,HLA-DOB,HLA-DMA,HLA-DRA,HLA-DMB,IL15RA</i>                                                      |
| KEGG | Rheumatoid arthritis                         | KEGG:05323 | 3.97E-04 | 3.401604839 | 86  | 112 | 9  | 7559 | <i>CTSK,HLA-DQB1,HLA-DRB5,HLA-DOB,ATP6V1G2,HLA-DMA,HLA-DRA,HLA-DMB,ATP6V0D1</i>                                      |

|      |                                                 |            |          |             |     |     |    |      |                                                                                                      |
|------|-------------------------------------------------|------------|----------|-------------|-----|-----|----|------|------------------------------------------------------------------------------------------------------|
| KEGG | Toll-like receptor signaling pathway            | KEGG:04620 | 1.38E-03 | 2.859964232 | 100 | 112 | 9  | 7559 | <i>CTSK,PIK3CD,STAT1,TLR3,NFKB1,IFNA2,IFNA6,IFNA14,MAPK1</i>                                         |
| KEGG | Kaposi sarcoma-associated herpesvirus infection | KEGG:05167 | 2.09E-03 | 2.680465012 | 191 | 112 | 12 | 7559 | <i>PIK3CD,STAT1,CCR8,TLR3,NFKB1,HLA-E,HLA-G,IFNA2,IFNA6,IFNA14,PIK3R5,MAPK1</i>                      |
| KEGG | Staphylococcus aureus infection                 | KEGG:05150 | 2.77E-03 | 2.55676837  | 84  | 112 | 8  | 7559 | <i>HLA-DQB1,HLA-DRB5,HLA-DOB,C4B,C4A,HLA-DMA,HLA-DRA,HLA-DMB</i>                                     |
| KEGG | Coronavirus disease - COVID-19                  | KEGG:05171 | 4.62E-03 | 2.335221121 | 207 | 112 | 12 | 7559 | <i>PIK3CD,STAT1,TLR3,NFKB1,C4B,C4A,IFNA2,IFNA6,IFNA14,RPL6,RPL41,MAPK1</i>                           |
| KEGG | Human papillomavirus infection                  | KEGG:05165 | 5.12E-03 | 2.290816259 | 315 | 112 | 15 | 7559 | <i>PIK3CD,STAT1,TLR3,NFKB1,TNXB,ATP6V1G2,HLA-E,HLA-G,PTK2,IFNA2,IFNA6,IFNA14,ATP6V0D1,WNT3,MAPK1</i> |
| KEGG | Human immunodeficiency virus 1 infection        | KEGG:05170 | 2.08E-02 | 1.681466733 | 207 | 112 | 11 | 7559 | <i>PIK3CD,NFKB1,TAP1,HLA-E,HLA-G,PTK2,IFNA2,IFNA6,IFNA14,MAPK1,LIMK2</i>                             |
| KEGG | Cell adhesion molecules                         | KEGG:04514 | 2.28E-02 | 1.642637903 | 143 | 112 | 9  | 7559 | <i>HLA-DQB1,HLA-DRB5,HLA-DOB,HLA-DMA,HLA-DRA,HLA-DMB,HLA-E,HLA-G,CD226</i>                           |
| KEGG | Alcoholism                                      | KEGG:05034 | 2.48E-02 | 1.605584125 | 177 | 112 | 10 | 7559 | <i>ATF6B,HIST1H2BN,HIST1H4J,HIST1H2BK,HIST1H2BJ,HIST1H2AC,HIST1H2BD,HIST1H2AB,PPP1CC,MAPK1</i>       |
| KEGG | Human cytomegalovirus infection                 | KEGG:05163 | 2.89E-02 | 1.538883593 | 215 | 112 | 11 | 7559 | <i>PIK3CD,NFKB1,TAP1,ATF6B,HLA-E,HLA-G,PTK2,IFNA2,IFNA6,IFNA14,MAPK1</i>                             |
| KEGG | Natural killer cell mediated cytotoxicity       | KEGG:04650 | 2.90E-02 | 1.538112416 | 117 | 112 | 8  | 7559 | <i>PIK3CD,HLA-E,HLA-G,IFNA2,IFNA6,IFNA14,IFNGR2,MAPK1</i>                                            |
| KEGG | Neutrophil extracellular trap formation         | KEGG:04613 | 3.39E-02 | 1.470331265 | 184 | 112 | 10 | 7559 | <i>PIK3CD,NFKB1,HIST1H2BN,HIST1H4J,HIST1H2BK,HIST1H2BJ,HIST1H2AC,HIST1H2BD,HIST1H2AB,MAPK1</i>       |
| KEGG | Necroptosis                                     | KEGG:04217 | 3.59E-02 | 1.445438662 | 152 | 112 | 9  | 7559 | <i>FAF1,STAT1,TLR3,HIST1H2AC,HIST1H2AB,IFNA2,IFNA6,IFNA14,IFNGR2</i>                                 |
| KEGG | JAK-STAT signaling pathway                      | KEGG:04630 | 4.99E-02 | 1.302152796 | 159 | 112 | 9  | 7559 | <i>MCL1,PIK3CD,STAT1,IFNA2,IFNA6,IFNA14,IL15RA,PTPN2,IFNGR2</i>                                      |

|      |                                                                                                              |                            |          |             |     |     |    |       |                                                                                                      |
|------|--------------------------------------------------------------------------------------------------------------|----------------------------|----------|-------------|-----|-----|----|-------|------------------------------------------------------------------------------------------------------|
| KEGG | Hepatitis B                                                                                                  | KEGG:05161                 | 4.99E-02 | 1.302152796 | 159 | 112 | 9  | 7559  | <i>PIK3CD,STAT1,TLR3,NFKB1,ATF6B,IFNA2,IFNA6,IFNA14,MA<br/>PK1</i>                                   |
| REAC | Recognition and<br>association of<br>DNA glycosylase<br>with site<br>containing an<br>affected<br>pyrimidine | REAC:R-<br>HSA-110328      | 5.93E-05 | 4.226652113 | 60  | 153 | 9  | 10770 | <i>HIST1H2BN,HIST1H4J,HIST1H2BK,HIST1H2BJ,HIST1H2AC,HI<br/>ST1H2BD,HIST1H2AB,NEIL2,ACD</i>           |
| REAC | Depyrimidination                                                                                             | REAC:R-<br>HSA-73928       | 5.93E-05 | 4.226652113 | 60  | 153 | 9  | 10770 | <i>HIST1H2BN,HIST1H4J,HIST1H2BK,HIST1H2BJ,HIST1H2AC,HI<br/>ST1H2BD,HIST1H2AB,NEIL2,ACD</i>           |
| REAC | Cleavage of the<br>damaged<br>pyrimidine                                                                     | REAC:R-<br>HSA-110329      | 5.93E-05 | 4.226652113 | 60  | 153 | 9  | 10770 | <i>HIST1H2BN,HIST1H4J,HIST1H2BK,HIST1H2BJ,HIST1H2AC,HI<br/>ST1H2BD,HIST1H2AB,NEIL2,ACD</i>           |
| REAC | Base-Excision<br>Repair, AP Site<br>Formation                                                                | REAC:R-<br>HSA-73929       | 6.88E-05 | 4.162575461 | 61  | 153 | 9  | 10770 | <i>HIST1H2BN,HIST1H4J,HIST1H2BK,HIST1H2BJ,HIST1H2AC,HI<br/>ST1H2BD,HIST1H2AB,NEIL2,ACD</i>           |
| REAC | Packaging Of<br>Telomere Ends                                                                                | REAC:R-<br>HSA-171306      | 2.45E-04 | 3.611158788 | 52  | 153 | 8  | 10770 | <i>HIST1H2BN,HIST1H4J,HIST1H2BK,HIST1H2BJ,HIST1H2AC,HI<br/>ST1H2BD,HIST1H2AB,ACD</i>                 |
| REAC | Cleavage of the<br>damaged purine                                                                            | REAC:R-<br>HSA-110331      | 3.82E-04 | 3.41783861  | 55  | 153 | 8  | 10770 | <i>HIST1H2BN,HIST1H4J,HIST1H2BK,HIST1H2BJ,HIST1H2AC,HI<br/>ST1H2BD,HIST1H2AB,ACD</i>                 |
| REAC | Depurination                                                                                                 | REAC:R-<br>HSA-73927       | 3.82E-04 | 3.41783861  | 55  | 153 | 8  | 10770 | <i>HIST1H2BN,HIST1H4J,HIST1H2BK,HIST1H2BJ,HIST1H2AC,HI<br/>ST1H2BD,HIST1H2AB,ACD</i>                 |
| REAC | Recognition and<br>association of<br>DNA glycosylase<br>with site<br>containing an<br>affected purine        | REAC:R-<br>HSA-110330      | 3.82E-04 | 3.41783861  | 55  | 153 | 8  | 10770 | <i>HIST1H2BN,HIST1H4J,HIST1H2BK,HIST1H2BJ,HIST1H2AC,HI<br/>ST1H2BD,HIST1H2AB,ACD</i>                 |
| REAC | Meiotic synapsis                                                                                             | REAC:R-<br>HSA-<br>1221632 | 5.27E-04 | 3.27793165  | 77  | 153 | 9  | 10770 | <i>SYCP1,HIST1H2BN,HIST1H4J,HIST1H2BK,HIST1H2BJ,HIST1<br/>H2AC,HIST1H2BD,HIST1H2AB,ACD</i>           |
| REAC | Interferon<br>Signaling                                                                                      | REAC:R-<br>HSA-913531      | 1.40E-03 | 2.853719738 | 193 | 153 | 13 | 10770 | <i>STAT1,FLNB,HLA-DQA1,HLA-DRB5,HLA-DRA,TRIM38,HLA-<br/>E,TRIM31,HLA-G,IFNA2,IFNA6,IFNA14,IFNGR2</i> |



|      |                                                                 |                    |          |             |     |     |    |       |                                                                                                |
|------|-----------------------------------------------------------------|--------------------|----------|-------------|-----|-----|----|-------|------------------------------------------------------------------------------------------------|
| REAC | Senescence-Associated Secretory Phenotype (SASP)                | REAC:R-HSA-2559582 | 1.63E-03 | 2.786857843 | 112 | 153 | 10 | 10770 | <i>NFKB1,HIST1H2BN,HIST1H4J,HIST1H2BK,HIST1H2BJ,HIST1H2AC,HIST1H2BD,HIST1H2AB,ANAPC7,MAPK1</i> |
| REAC | Inhibition of DNA recombination at telomere                     | REAC:R-HSA-9670095 | 1.77E-03 | 2.751461326 | 67  | 153 | 8  | 10770 | <i>HIST1H2BN,HIST1H4J,HIST1H2BK,HIST1H2BJ,HIST1H2AC,HIST1H2BD,HIST1H2AB,ACD</i>                |
| REAC | Transcriptional regulation of granulopoiesis                    | REAC:R-HSA-9616222 | 1.80E-03 | 2.745341422 | 89  | 153 | 9  | 10770 | <i>HIST1H2BN,HIST1H4J,HIST1H2BK,HIST1H2BJ,HIST1H2AC,HIST1H2BD,HIST1H2AB,SPI1,CBFB</i>          |
| REAC | Base Excision Repair                                            | REAC:R-HSA-73884   | 1.80E-03 | 2.745341422 | 89  | 153 | 9  | 10770 | <i>HIST1H2BN,HIST1H4J,HIST1H2BK,HIST1H2BJ,HIST1H2AC,HIST1H2BD,HIST1H2AB,NEIL2,ACD</i>          |
| REAC | ERCC6 (CSB) and EHMT2 (G9a) positively regulate rRNA expression | REAC:R-HSA-427389  | 4.60E-03 | 2.337276093 | 76  | 153 | 8  | 10770 | <i>HIST1H2BN,HIST1H4J,HIST1H2BK,HIST1H2BJ,HIST1H2AC,HIST1H2BD,HIST1H2AB,GATAD2A</i>            |
| REAC | DNA Damage/Telomere Stress Induced Senescence                   | REAC:R-HSA-2559586 | 6.74E-03 | 2.171324217 | 80  | 153 | 8  | 10770 | <i>HIST1H2BN,HIST1H4J,HIST1H2BK,HIST1H2BJ,HIST1H2AC,HIST1H2BD,HIST1H2AB,ACD</i>                |
| REAC | Pre-NOTCH Expression and Processing                             | REAC:R-HSA-1912422 | 9.47E-03 | 2.023541222 | 109 | 153 | 9  | 10770 | <i>POGLUT1,HIST1H2BN,HIST1H4J,HIST1H2BK,HIST1H2BJ,HIST1H2AC,HIST1H2BD,HIST1H2AB,ATP2A2</i>     |
| REAC | RNA Polymerase I Promoter Opening                               | REAC:R-HSA-73728   | 1.16E-02 | 1.936753703 | 63  | 153 | 7  | 10770 | <i>HIST1H2BN,HIST1H4J,HIST1H2BK,HIST1H2BJ,HIST1H2AC,HIST1H2BD,HIST1H2AB</i>                    |
| REAC | Interferon gamma signaling                                      | REAC:R-HSA-877300  | 1.25E-02 | 1.903275821 | 87  | 153 | 8  | 10770 | <i>HLA-DQA1,HLA-DRB5,HLA-DRA,TRIM38,HLA-E,TRIM31,HLA-G,IFNGR2</i>                              |
| REAC | DNA methylation                                                 | REAC:R-HSA-5334118 | 1.42E-02 | 1.847262757 | 65  | 153 | 7  | 10770 | <i>HIST1H2BN,HIST1H4J,HIST1H2BK,HIST1H2BJ,HIST1H2AC,HIST1H2BD,HIST1H2AB</i>                    |
| REAC | Meiosis                                                         | REAC:R-HSA-1500620 | 1.67E-02 | 1.778239702 | 117 | 153 | 9  | 10770 | <i>SYCP1,HIST1H2BN,HIST1H4J,HIST1H2BK,HIST1H2BJ,HIST1H2AC,HIST1H2BD,HIST1H2AB,ACD</i>          |
| REAC | Formation of the beta-catenin:TCF transactivating complex       | REAC:R-HSA-201722  | 1.73E-02 | 1.761376398 | 91  | 153 | 8  | 10770 | <i>RUNX3,HIST1H2BN,HIST1H4J,HIST1H2BK,HIST1H2BJ,HIST1H2AC,HIST1H2BD,HIST1H2AB</i>              |

|      |                                                                                                 |                    |          |             |     |     |   |       |                                                                                        |
|------|-------------------------------------------------------------------------------------------------|--------------------|----------|-------------|-----|-----|---|-------|----------------------------------------------------------------------------------------|
| REAC | Activated PKN1 stimulates transcription of AR (androgen receptor) regulated genes KLK2 and KLK3 | REAC:R-HSA-5625886 | 1.73E-02 | 1.760943964 | 67  | 153 | 7 | 10770 | <i>HIST1H2BN,HIST1H4J,HIST1H2BK,HIST1H2BJ,HIST1H2AC,HIST1H2BD,HIST1H2AB</i>            |
| REAC | SIRT1 negatively regulates rRNA expression                                                      | REAC:R-HSA-427359  | 1.91E-02 | 1.718912152 | 68  | 153 | 7 | 10770 | <i>HIST1H2BN,HIST1H4J,HIST1H2BK,HIST1H2BJ,HIST1H2AC,HIST1H2BD,HIST1H2AB</i>            |
| REAC | Activation of anterior HOX genes in hindbrain development during early embryogenesis            | REAC:R-HSA-5617472 | 2.03E-02 | 1.691463848 | 120 | 153 | 9 | 10770 | <i>HIST1H2BN,HIST1H4J,HIST1H2BK,HIST1H2BJ,HIST1H2AC,HIST1H2BD,HIST1H2AB,CTCF,HOXB3</i> |
| REAC | Activation of HOX genes during differentiation                                                  | REAC:R-HSA-5619507 | 2.03E-02 | 1.691463848 | 120 | 153 | 9 | 10770 | <i>HIST1H2BN,HIST1H4J,HIST1H2BK,HIST1H2BJ,HIST1H2AC,HIST1H2BD,HIST1H2AB,CTCF,HOXB3</i> |
| REAC | HDACs deacetylate histones                                                                      | REAC:R-HSA-3214815 | 2.19E-02 | 1.659761587 | 94  | 153 | 8 | 10770 | <i>HIST1H2BN,HIST1H4J,HIST1H2BK,HIST1H2BJ,HIST1H2AC,HIST1H2BD,HIST1H2AB,GATAD2A</i>    |
| REAC | RHO GTPases activate PKNs                                                                       | REAC:R-HSA-5625740 | 2.19E-02 | 1.659761587 | 94  | 153 | 8 | 10770 | <i>HIST1H2BN,HIST1H4J,HIST1H2BK,HIST1H2BJ,HIST1H2AC,HIST1H2BD,HIST1H2AB,MYL6</i>       |
| REAC | RUNX1 regulates genes involved in megakaryocyte differentiation and platelet function           | REAC:R-HSA-8936459 | 2.74E-02 | 1.56196932  | 97  | 153 | 8 | 10770 | <i>HIST1H2BN,HIST1H4J,HIST1H2BK,HIST1H2BJ,HIST1H2AC,HIST1H2BD,HIST1H2AB,CBFB</i>       |
| REAC | Deposition of new CENPA-containing nucleosomes at the centromere                                | REAC:R-HSA-606279  | 3.03E-02 | 1.519146278 | 73  | 153 | 7 | 10770 | <i>HIST1H2BN,HIST1H4J,HIST1H2BK,HIST1H2BJ,HIST1H2AC,HIST1H2BD,HIST1H2AB</i>            |
| REAC | Defective pyroptosis                                                                            | REAC:R-HSA-9710421 | 3.03E-02 | 1.519146278 | 73  | 153 | 7 | 10770 | <i>HIST1H2BN,HIST1H4J,HIST1H2BK,HIST1H2BJ,HIST1H2AC,HIST1H2BD,HIST1H2AB</i>            |
| REAC | Condensation of Prophase Chromosomes                                                            | REAC:R-HSA-2299718 | 3.03E-02 | 1.519146278 | 73  | 153 | 7 | 10770 | <i>HIST1H2BN,HIST1H4J,HIST1H2BK,HIST1H2BJ,HIST1H2AC,HIST1H2BD,HIST1H2AB</i>            |

|      |                                                                            |                    |          |             |     |     |    |       |                                                                                                    |
|------|----------------------------------------------------------------------------|--------------------|----------|-------------|-----|-----|----|-------|----------------------------------------------------------------------------------------------------|
| REAC | Nucleosome assembly                                                        | REAC:R-HSA-774815  | 3.03E-02 | 1.519146278 | 73  | 153 | 7  | 10770 | <i>HIST1H2BN,HIST1H4J,HIST1H2BK,HIST1H2BJ,HIST1H2AC,HIST1H2BD,HIST1H2AB</i>                        |
| REAC | PRC2 methylates histones and DNA                                           | REAC:R-HSA-212300  | 3.03E-02 | 1.519146278 | 73  | 153 | 7  | 10770 | <i>HIST1H2BN,HIST1H4J,HIST1H2BK,HIST1H2BJ,HIST1H2AC,HIST1H2BD,HIST1H2AB</i>                        |
| REAC | RUNX1 regulates transcription of genes involved in differentiation of HSCs | REAC:R-HSA-8939236 | 3.80E-02 | 1.420385273 | 130 | 153 | 9  | 10770 | <i>HIST1H2BN,HIST1H4J,HIST1H2BK,HIST1H2BJ,HIST1H2AC,HIST1H2BD,HIST1H2AB,SPI1,CBFB</i>              |
| REAC | Cellular Senescence                                                        | REAC:R-HSA-2559583 | 4.12E-02 | 1.385530099 | 195 | 153 | 11 | 10770 | <i>NFKB1,HIST1H2BN,HIST1H4J,HIST1H2BK,HIST1H2BJ,HIST1H2AC,HIST1H2BD,HIST1H2AB,ANAPC7,ACD,MAPK1</i> |
| REAC | Transcriptional regulation by small RNAs                                   | REAC:R-HSA-5578749 | 4.20E-02 | 1.376905572 | 103 | 153 | 8  | 10770 | <i>HIST1H2BN,HIST1H4J,HIST1H2BK,HIST1H2BJ,HIST1H2AC,HIST1H2BD,HIST1H2AB,IPO8</i>                   |
| REAC | Positive epigenetic regulation of rRNA expression                          | REAC:R-HSA-5250913 | 4.81E-02 | 1.318104895 | 105 | 153 | 8  | 10770 | <i>HIST1H2BN,HIST1H4J,HIST1H2BK,HIST1H2BJ,HIST1H2AC,HIST1H2BD,HIST1H2AB,GATAD2A</i>                |
| WP   | Ebola virus infection in host                                              | WP:WP4217          | 1.29E-05 | 4.888675309 | 126 | 117 | 13 | 7364  | <i>PIK3CD,STAT1,FLNB,NFKB1,HLA-DQB1,HLA-DRB5,HLA-DOB,HLA-DMA,HLA-DRA,HLA-DMB,HLA-E,HLA-G,MAPK1</i> |
| WP   | Allograft rejection                                                        | WP:WP2328          | 1.48E-05 | 4.828873928 | 86  | 117 | 11 | 7364  | <i>STAT1,HLA-DQB1,HLA-DRB5,HLA-DOB,C4B,C4A,HLA-DMA,HLA-DRA,HLA-DMB,HLA-E,HLA-G</i>                 |
| WP   | Toll-like receptor signaling pathway                                       | WP:WP75            | 5.54E-03 | 2.256284575 | 103 | 117 | 9  | 7364  | <i>PIK3CD,STAT1,TLR3,NFKB1,IFNA2,IFNA6,IFNA14,PIK3R5,MAPK1</i>                                     |
| WP   | SARS coronavirus and innate immunity                                       | WP:WP4912          | 1.85E-02 | 1.733256037 | 31  | 117 | 5  | 7364  | <i>STAT1,TLR3,IFNA2,IFNA6,IFNA14</i>                                                               |
| WP   | RANKL/RANK signaling pathway                                               | WP:WP2018          | 3.19E-02 | 1.495584171 | 54  | 117 | 6  | 7364  | <i>CTSK,STAT1,NFKB1,PTK2,SPII,MAPK1</i>                                                            |
| WP   | Prion disease pathway                                                      | WP:WP3995          | 3.36E-02 | 1.474096129 | 35  | 117 | 5  | 7364  | <i>NFKB1,PTK2,SPII,CTCF,MAPK1</i>                                                                  |
| WP   | Overview of interferons-                                                   | WP:WP4558          | 3.36E-02 | 1.474096129 | 35  | 117 | 5  | 7364  | <i>STAT1,IFNA2,IFNA6,IFNA14,IFNGR2</i>                                                             |

|       |                                 |                      |          |             |     |     |    |       |                                                                                         |
|-------|---------------------------------|----------------------|----------|-------------|-----|-----|----|-------|-----------------------------------------------------------------------------------------|
|       | mediated signaling pathway      |                      |          |             |     |     |    |       |                                                                                         |
| WP    | Type II interferon signaling    | WP:WP619             | 3.85E-02 | 1.414653844 | 36  | 117 | 5  | 7364  | <i>STAT1,TAP1,IFNA2,SPI1,IFNGR2</i>                                                     |
| WP    | Immune response to tuberculosis | WP:WP4197            | 4.79E-02 | 1.319899218 | 21  | 117 | 4  | 7364  | <i>STAT1,TAP1,PTPN2,IFNGR2</i>                                                          |
| MIRNA | hsa-miR-296-3p                  | MIRNA:hsa-miR-296-3p | 1.11E-02 | 1.956039092 | 233 | 184 | 13 | 13650 | <i>RPRD2,LYPLA2,CTSK,SETDB1,VARS,HSPA1B,BRD2,HIST1H2BD,HLA-E,ATAT1,SPI1,VMP1,PLAGL2</i> |

**Supplementary Table S16.** Pathways associated with headache and hyperthyroidism.

| source | term name                                                  | term id    | adjusted_p value | negative_log10_of_adjusted_p value | term size | query size | Intersection size | effective_domain size | Intersections                                                                  |
|--------|------------------------------------------------------------|------------|------------------|------------------------------------|-----------|------------|-------------------|-----------------------|--------------------------------------------------------------------------------|
| GO:MF  | MHC class II protein complex binding                       | GO:0023026 | 3.50E-07         | 6.456247707                        | 25        | 84         | 6                 | 20183                 | <i>HLA-DQA1,HLA-DRB5,HLA-DMA,HLA-DMB,HLA-DOB,HLA-DRA</i>                       |
| GO:MF  | sialic acid transmembrane transporter activity             | GO:0015136 | 6.75E-07         | 6.170434336                        | 5         | 84         | 4                 | 20183                 | <i>SLC17A2,SLC17A3,SLC17A1,SLC17A4</i>                                         |
| GO:MF  | MHC protein complex binding                                | GO:0023023 | 2.13E-06         | 5.671620483                        | 33        | 84         | 6                 | 20183                 | <i>HLA-DQA1,HLA-DRB5,HLA-DMA,HLA-DMB,HLA-DOB,HLA-DRA</i>                       |
| GO:MF  | sodium:phosphate symporter activity                        | GO:0005436 | 4.37E-05         | 4.359165366                        | 11        | 84         | 4                 | 20183                 | <i>SLC17A2,SLC17A3,SLC17A1,SLC17A4</i>                                         |
| GO:MF  | peptide antigen binding                                    | GO:0042605 | 1.16E-04         | 3.934182198                        | 33        | 84         | 5                 | 20183                 | <i>HLA-DQA1,HLA-DRB5,HLA-B,HLA-C,HLA-DRA</i>                                   |
| GO:MF  | MHC class II receptor activity                             | GO:0032395 | 1.86E-03         | 2.729945318                        | 8         | 84         | 3                 | 20183                 | <i>HLA-DQA1,HLA-DOB,HLA-DRA</i>                                                |
| GO:MF  | peptide binding                                            | GO:0042277 | 2.38E-02         | 1.623018991                        | 314       | 84         | 8                 | 20183                 | <i>GPR149,HLA-DQA1,HLA-DRB5,HLA-B,HLA-C,POM121L2,HLA-DRA,BRAP</i>              |
| GO:MF  | carbohydrate derivative transmembrane transporter activity | GO:1901505 | 4.22E-02         | 1.374584178                        | 56        | 84         | 4                 | 20183                 | <i>SLC17A2,SLC17A3,SLC17A1,SLC17A4</i>                                         |
| GO:BP  | antigen processing and                                     | GO:0048002 | 2.22E-09         | 8.654209781                        | 82        | 84         | 10                | 21100                 | <i>HLA-DQA1,HLA-DRB5,HLA-B,PSMB9,HLA-DMA,HLA-DMB,HLA-DOB,HLA-C,HFE,HLA-DRA</i> |

|       |                                                                                           |            |          |             |     |    |    |       |                                                                                         |
|-------|-------------------------------------------------------------------------------------------|------------|----------|-------------|-----|----|----|-------|-----------------------------------------------------------------------------------------|
|       | presentation of peptide antigen                                                           |            |          |             |     |    |    |       |                                                                                         |
| GO:BP | antigen processing and presentation of exogenous peptide antigen                          | GO:0002478 | 3.93E-09 | 8.405921051 | 59  | 84 | 9  | 21100 | <i>HLA-DQA1,HLA-DRB5,HLA-B,PSMB9,HLA-DMA,HLA-DMB,HLA-DOB,HLA-C,HLA-DRA</i>              |
| GO:BP | antigen processing and presentation                                                       | GO:0019882 | 7.68E-09 | 8.114826509 | 128 | 84 | 11 | 21100 | <i>HLA-DQA1,HLA-DQB1,HLA-DRB5,HLA-B,PSMB9,HLA-DMA,HLA-DMB,HLA-DOB,HLA-C,HFE,HLA-DRA</i> |
| GO:BP | antigen processing and presentation of exogenous antigen                                  | GO:0019884 | 1.96E-08 | 7.707291646 | 70  | 84 | 9  | 21100 | <i>HLA-DQA1,HLA-DRB5,HLA-B,PSMB9,HLA-DMA,HLA-DMB,HLA-DOB,HLA-C,HLA-DRA</i>              |
| GO:BP | peptide antigen assembly with MHC class II protein complex                                | GO:0002503 | 2.21E-08 | 7.65593843  | 14  | 84 | 6  | 21100 | <i>HLA-DQA1,HLA-DRB5,HLA-DMA,HLA-DMB,HLA-DOB,HLA-DRA</i>                                |
| GO:BP | MHC class II protein complex assembly                                                     | GO:0002399 | 2.21E-08 | 7.65593843  | 14  | 84 | 6  | 21100 | <i>HLA-DQA1,HLA-DRB5,HLA-DMA,HLA-DMB,HLA-DOB,HLA-DRA</i>                                |
| GO:BP | peptide antigen assembly with MHC protein complex                                         | GO:0002501 | 1.35E-07 | 6.870335597 | 18  | 84 | 6  | 21100 | <i>HLA-DQA1,HLA-DRB5,HLA-DMA,HLA-DMB,HLA-DOB,HLA-DRA</i>                                |
| GO:BP | MHC protein complex assembly                                                              | GO:0002396 | 1.35E-07 | 6.870335597 | 18  | 84 | 6  | 21100 | <i>HLA-DQA1,HLA-DRB5,HLA-DMA,HLA-DMB,HLA-DOB,HLA-DRA</i>                                |
| GO:BP | antigen processing and presentation of peptide or polysaccharide antigen via MHC class II | GO:0002504 | 2.12E-07 | 6.673252449 | 36  | 84 | 7  | 21100 | <i>HLA-DQA1,HLA-DQB1,HLA-DRB5,HLA-DMA,HLA-DMB,HLA-DOB,HLA-DRA</i>                       |
| GO:BP | sialic acid transport                                                                     | GO:0015739 | 2.65E-06 | 5.577152284 | 5   | 84 | 4  | 21100 | <i>SLC17A2,SLC17A3,SLC17A1,SLC17A4</i>                                                  |
| GO:BP | antigen processing and presentation of exogenous peptide antigen via MHC class II         | GO:0019886 | 2.65E-06 | 5.576746449 | 28  | 84 | 6  | 21100 | <i>HLA-DQA1,HLA-DRB5,HLA-DMA,HLA-DMB,HLA-DOB,HLA-DRA</i>                                |

|       |                                                                                   |            |          |             |     |    |   |       |                                                                               |
|-------|-----------------------------------------------------------------------------------|------------|----------|-------------|-----|----|---|-------|-------------------------------------------------------------------------------|
| GO:BP | antigen processing and presentation of peptide antigen via MHC class II           | GO:0002495 | 6.29E-06 | 5.201079374 | 32  | 84 | 6 | 21100 | <i>HLA-DQA1,HLA-DRB5,HLA-DMA,HLA-DMB,HLA-DOB,HLA-DRA</i>                      |
| GO:BP | antigen processing and presentation of endogenous peptide antigen                 | GO:0002483 | 1.97E-03 | 2.706199952 | 19  | 84 | 4 | 21100 | <i>HLA-B,HLA-C,HFE,HLA-DRA</i>                                                |
| GO:BP | antigen processing and presentation of endogenous antigen                         | GO:0019883 | 7.43E-03 | 2.129164643 | 26  | 84 | 4 | 21100 | <i>HLA-B,HLA-C,HFE,HLA-DRA</i>                                                |
| GO:BP | protein-DNA complex subunit organization                                          | GO:0071824 | 2.70E-02 | 1.568949727 | 269 | 84 | 8 | 21100 | <i>PSMB9,BRD2,HIST1H4J,HIST1H2BK,HIST1H2BD,HIST1H1E,SMARCC2,RRN3</i>          |
| GO:BP | antigen processing and presentation of endogenous peptide antigen via MHC class I | GO:0019885 | 3.84E-02 | 1.415216071 | 13  | 84 | 3 | 21100 | <i>HLA-B,HLA-C,HFE</i>                                                        |
| GO:CC | MHC protein complex                                                               | GO:0042611 | 5.61E-14 | 13.25096891 | 24  | 85 | 9 | 21698 | <i>HLA-DQA1,HLA-DQB1,HLA-DRB5,HLA-B,HLA-DMA,HLA-DMB,HLA-DOB,HLA-C,HLA-DRA</i> |
| GO:CC | MHC class II protein complex                                                      | GO:0042613 | 6.64E-11 | 10.17769087 | 17  | 85 | 7 | 21698 | <i>HLA-DQA1,HLA-DQB1,HLA-DRB5,HLA-DMA,HLA-DMB,HLA-DOB,HLA-DRA</i>             |
| GO:CC | integral component of luminal side of endoplasmic reticulum membrane              | GO:0071556 | 1.31E-05 | 4.882359967 | 25  | 85 | 5 | 21698 | <i>HLA-DQA1,HLA-DRB5,HLA-B,HLA-C,HLA-DRA</i>                                  |
| GO:CC | luminal side of endoplasmic reticulum membrane                                    | GO:0098553 | 1.31E-05 | 4.882359967 | 25  | 85 | 5 | 21698 | <i>HLA-DQA1,HLA-DRB5,HLA-B,HLA-C,HLA-DRA</i>                                  |
| GO:CC | luminal side of membrane                                                          | GO:0098576 | 4.86E-05 | 4.313038499 | 32  | 85 | 5 | 21698 | <i>HLA-DQA1,HLA-DRB5,HLA-B,HLA-C,HLA-DRA</i>                                  |
| GO:CC | ER to Golgi transport vesicle membrane                                            | GO:0012507 | 9.37E-04 | 3.028485126 | 57  | 85 | 5 | 21698 | <i>HLA-DQA1,HLA-DRB5,HLA-B,HLA-C,HLA-DRA</i>                                  |

|       |                                                       |            |          |             |     |    |    |       |                                                                                                              |
|-------|-------------------------------------------------------|------------|----------|-------------|-----|----|----|-------|--------------------------------------------------------------------------------------------------------------|
| GO:CC | DNA packaging complex                                 | GO:0044815 | 4.38E-03 | 2.358061846 | 200 | 85 | 7  | 21698 | <i>HIST1H4J,HIST1H2BK,HIST1H2BD,HIST1H2AC,HIST1H1E,SMA<br/>RCC2, TOP3B</i>                                   |
| GO:CC | transport vesicle membrane                            | GO:0030658 | 5.48E-03 | 2.261460301 | 207 | 85 | 7  | 21698 | <i>HLA-DQA1,HLA-DRB5,HLA-B,HLA-C,PRRT1,SCGN,HLA-DRA</i>                                                      |
| GO:CC | COPII-coated ER to Golgi transport vesicle            | GO:0030134 | 8.88E-03 | 2.05140611  | 90  | 85 | 5  | 21698 | <i>HLA-DQA1,HLA-DRB5,HLA-B,HLA-C,HLA-DRA</i>                                                                 |
| GO:CC | integral component of endoplasmic reticulum membrane  | GO:0030176 | 1.41E-02 | 1.851557629 | 163 | 85 | 6  | 21698 | <i>HLA-DQA1,HLA-DRB5,ATF6B,HLA-B,HLA-C,HLA-DRA</i>                                                           |
| GO:CC | intrinsic component of endoplasmic reticulum membrane | GO:0031227 | 1.84E-02 | 1.735606773 | 171 | 85 | 6  | 21698 | <i>HLA-DQA1,HLA-DRB5,ATF6B,HLA-B,HLA-C,HLA-DRA</i>                                                           |
| KEGG  | Type I diabetes mellitus                              | KEGG:04940 | 7.82E-13 | 12.10692565 | 40  | 29 | 9  | 7559  | <i>HLA-DQB1,HLA-DRB5,LTA,HLA-B,HLA-DMA,HLA-DMB,HLA-<br/>DOB,HLA-C,HLA-DRA</i>                                |
| KEGG  | Systemic lupus erythematosus                          | KEGG:05322 | 8.27E-13 | 12.08235807 | 127 | 29 | 12 | 7559  | <i>HLA-DQB1,HLA-DRB5,C4B,HLA-DMA,HLA-DMB,C4A,HLA-<br/>DOB,HIST1H4J,HIST1H2BK,HIST1H2BD,HIST1H2AC,HLA-DRA</i> |
| KEGG  | Allograft rejection                                   | KEGG:05330 | 1.88E-11 | 10.72477263 | 34  | 29 | 8  | 7559  | <i>HLA-DQB1,HLA-DRB5,HLA-B,HLA-DMA,HLA-DMB,HLA-<br/>DOB,HLA-C,HLA-DRA</i>                                    |
| KEGG  | Graft-versus-host disease                             | KEGG:05332 | 3.98E-11 | 10.40035265 | 37  | 29 | 8  | 7559  | <i>HLA-DQB1,HLA-DRB5,HLA-B,HLA-DMA,HLA-DMB,HLA-<br/>DOB,HLA-C,HLA-DRA</i>                                    |
| KEGG  | Antigen processing and presentation                   | KEGG:04612 | 1.15E-10 | 9.94087964  | 67  | 29 | 9  | 7559  | <i>HLA-DQB1,HLA-DRB5,HLA-B,HLA-DMA,HLA-DMB,HLA-<br/>DOB,HSPA1B,HLA-C,HLA-DRA</i>                             |
| KEGG  | Autoimmune thyroid disease                            | KEGG:05320 | 4.51E-10 | 9.345813303 | 49  | 29 | 8  | 7559  | <i>HLA-DQB1,HLA-DRB5,HLA-B,HLA-DMA,HLA-DMB,HLA-<br/>DOB,HLA-C,HLA-DRA</i>                                    |
| KEGG  | Viral myocarditis                                     | KEGG:05416 | 1.20E-09 | 8.920950472 | 55  | 29 | 8  | 7559  | <i>HLA-DQB1,HLA-DRB5,HLA-B,HLA-DMA,HLA-DMB,HLA-<br/>DOB,HLA-C,HLA-DRA</i>                                    |
| KEGG  | Asthma                                                | KEGG:05310 | 3.50E-08 | 7.456331623 | 27  | 29 | 6  | 7559  | <i>HLA-DQB1,HLA-DRB5,HLA-DMA,HLA-DMB,HLA-DOB,HLA-<br/>DRA</i>                                                |
| KEGG  | Staphylococcus aureus infection                       | KEGG:05150 | 4.00E-08 | 7.398345885 | 84  | 29 | 8  | 7559  | <i>HLA-DQB1,HLA-DRB5,C4B,HLA-DMA,HLA-DMB,C4A,HLA-<br/>DOB,HLA-DRA</i>                                        |
| KEGG  | Human T-cell leukemia virus 1 infection               | KEGG:05166 | 1.99E-07 | 6.701527849 | 211 | 29 | 10 | 7559  | <i>HLA-DQB1,HLA-DRB5,ATF6B,LTA,HLA-B,HLA-DMA,HLA-<br/>DMB,HLA-DOB,HLA-C,HLA-DRA</i>                          |
| KEGG  | Intestinal immune network for IgA production          | KEGG:04672 | 7.98E-07 | 6.098221472 | 44  | 29 | 6  | 7559  | <i>HLA-DQB1,HLA-DRB5,HLA-DMA,HLA-DMB,HLA-DOB,HLA-<br/>DRA</i>                                                |

|      |                                               |                    |          |             |     |    |   |       |                                                                      |
|------|-----------------------------------------------|--------------------|----------|-------------|-----|----|---|-------|----------------------------------------------------------------------|
| KEGG | Phagosome                                     | KEGG:04145         | 2.01E-06 | 5.697449836 | 137 | 29 | 8 | 7559  | <i>HLA-DQB1,HLA-DRB5,HLA-B,HLA-DMA,HLA-DMB,HLA-DOB,HLA-C,HLA-DRA</i> |
| KEGG | Cell adhesion molecules                       | KEGG:04514         | 2.81E-06 | 5.551187472 | 143 | 29 | 8 | 7559  | <i>HLA-DQB1,HLA-DRB5,HLA-B,HLA-DMA,HLA-DMB,HLA-DOB,HLA-C,HLA-DRA</i> |
| KEGG | Inflammatory bowel disease                    | KEGG:05321         | 6.00E-06 | 5.221825943 | 61  | 29 | 6 | 7559  | <i>HLA-DQB1,HLA-DRB5,HLA-DMA,HLA-DMB,HLA-DOB,HLA-DRA</i>             |
| KEGG | Toxoplasmosis                                 | KEGG:05145         | 7.67E-06 | 5.115202006 | 107 | 29 | 7 | 7559  | <i>HLA-DQB1,HLA-DRB5,HLA-DMA,HLA-DMB,HLA-DOB,HSPA1B,HLA-DRA</i>      |
| KEGG | Leishmaniasis                                 | KEGG:05140         | 1.51E-05 | 4.821708016 | 71  | 29 | 6 | 7559  | <i>HLA-DQB1,HLA-DRB5,HLA-DMA,HLA-DMB,HLA-DOB,HLA-DRA</i>             |
| KEGG | Epstein-Barr virus infection                  | KEGG:05169         | 2.66E-05 | 4.575877647 | 191 | 29 | 8 | 7559  | <i>HLA-DQB1,HLA-DRB5,HLA-B,HLA-DMA,HLA-DMB,HLA-DOB,HLA-C,HLA-DRA</i> |
| KEGG | Th1 and Th2 cell differentiation              | KEGG:04658         | 4.76E-05 | 4.322566943 | 86  | 29 | 6 | 7559  | <i>HLA-DQB1,HLA-DRB5,HLA-DMA,HLA-DMB,HLA-DOB,HLA-DRA</i>             |
| KEGG | Rheumatoid arthritis                          | KEGG:05323         | 4.76E-05 | 4.322566943 | 86  | 29 | 6 | 7559  | <i>HLA-DQB1,HLA-DRB5,HLA-DMA,HLA-DMB,HLA-DOB,HLA-DRA</i>             |
| KEGG | Hematopoietic cell lineage                    | KEGG:04640         | 6.66E-05 | 4.176669425 | 91  | 29 | 6 | 7559  | <i>HLA-DQB1,HLA-DRB5,HLA-DMA,HLA-DMB,HLA-DOB,HLA-DRA</i>             |
| KEGG | Th17 cell differentiation                     | KEGG:04659         | 1.46E-04 | 3.834252315 | 104 | 29 | 6 | 7559  | <i>HLA-DQB1,HLA-DRB5,HLA-DMA,HLA-DMB,HLA-DOB,HLA-DRA</i>             |
| KEGG | Influenza A                                   | KEGG:05164         | 1.96E-03 | 2.707447325 | 163 | 29 | 6 | 7559  | <i>HLA-DQB1,HLA-DRB5,HLA-DMA,HLA-DMB,HLA-DOB,HLA-DRA</i>             |
| KEGG | Tuberculosis                                  | KEGG:05152         | 2.75E-03 | 2.561392124 | 173 | 29 | 6 | 7559  | <i>HLA-DQB1,HLA-DRB5,HLA-DMA,HLA-DMB,HLA-DOB,HLA-DRA</i>             |
| KEGG | Viral carcinogenesis                          | KEGG:05203         | 5.21E-03 | 2.282780088 | 194 | 29 | 6 | 7559  | <i>ATF6B,HLA-B,HIST1H4J,HLA-C,HIST1H2BK,HIST1H2BD</i>                |
| KEGG | Alcoholism                                    | KEGG:05034         | 3.40E-02 | 1.468495285 | 177 | 29 | 5 | 7559  | <i>ATF6B,HIST1H4J,HIST1H2BK,HIST1H2BD,HIST1H2AC</i>                  |
| REAC | Interferon gamma signaling                    | REAC:R-HSA-877300  | 6.39E-05 | 4.194368096 | 87  | 52 | 7 | 10770 | <i>HLA-DQA1,HLA-DRB5,HLA-B,HLA-C,TRIM38,HLA-DRA,TRIM31</i>           |
| REAC | Butyrophilin (BTN) family interactions        | REAC:R-HSA-8851680 | 8.48E-05 | 4.071437891 | 12  | 52 | 4 | 10770 | <i>BTN2A2,BTN1A1,BTN3A3,BTN3A2</i>                                   |
| REAC | Interferon Signaling                          | REAC:R-HSA-913531  | 1.29E-03 | 2.890683813 | 193 | 52 | 8 | 10770 | <i>EIF4E3,HLA-DQA1,HLA-DRB5,HLA-B,HLA-C,TRIM38,HLA-DRA,TRIM31</i>    |
| REAC | MHC class II antigen presentation             | REAC:R-HSA-2132295 | 9.49E-03 | 2.022520507 | 123 | 52 | 6 | 10770 | <i>HLA-DQA1,HLA-DRB5,HLA-DMA,HLA-DMB,HLA-DOB,HLA-DRA</i>             |
| REAC | DNA Damage/Telomere Stress Induced Senescence | REAC:R-HSA-2559586 | 1.44E-02 | 1.842113788 | 80  | 52 | 5 | 10770 | <i>HIST1H4J,HIST1H2BK,HIST1H2BD,HIST1H2AC,HIST1H1E</i>               |



|      |                                                  |                    |          |             |     |    |    |       |                                                                              |
|------|--------------------------------------------------|--------------------|----------|-------------|-----|----|----|-------|------------------------------------------------------------------------------|
| REAC | RNA Polymerase I Promoter Escape                 | REAC:R-HSA-73772   | 2.67E-02 | 1.572926215 | 91  | 52 | 5  | 10770 | <i>HIST1H4J,HIST1H2BK,HIST1H2BD,HIST1H2AC,RRN3</i>                           |
| REAC | Packaging Of Telomere Ends                       | REAC:R-HSA-171306  | 4.02E-02 | 1.39545972  | 52  | 52 | 4  | 10770 | <i>HIST1H4J,HIST1H2BK,HIST1H2BD,HIST1H2AC</i>                                |
| REAC | Translocation of ZAP-70 to Immunological synapse | REAC:R-HSA-202430  | 4.17E-02 | 1.380039724 | 20  | 52 | 3  | 10770 | <i>HLA-DQA1,HLA-DRB5,HLA-DRA</i>                                             |
| REAC | Transcriptional regulation by RUNX1              | REAC:R-HSA-8878171 | 4.68E-02 | 1.329977002 | 236 | 52 | 7  | 10770 | <i>PSMB9,HIST1H4J,HIST1H2BK,HIST1H2BD,HIST1H2AC,BLK,SMARCC2</i>              |
| WP   | Allograft rejection                              | WP:WP2328          | 2.54E-10 | 9.594924603 | 86  | 33 | 10 | 7364  | <i>HLA-DQB1,HLA-DRB5,C4B,HLA-B,HLA-DMA,HLA-DMB,C4A,HLA-DOB,HLA-C,HLA-DRA</i> |
| WP   | Ebola virus infection in host                    | WP:WP4217          | 7.06E-06 | 5.151480466 | 126 | 33 | 8  | 7364  | <i>HLA-DQB1,HLA-DRB5,HLA-B,HLA-DMA,HLA-DMB,HLA-DOB,HLA-C,HLA-DRA</i>         |

**Supplementary Table S17.** Pathways associated with headache and secondary hypothyroidism.

| source | term name                                     | term id    | adjusted_p value | negative_log10_of_adjusted_p value | term size | query size | intersection_size | effective_domain_size | intersections                         |
|--------|-----------------------------------------------|------------|------------------|------------------------------------|-----------|------------|-------------------|-----------------------|---------------------------------------|
| GO:MF  | TAP binding                                   | GO:0046977 | 5.39E-07         | 6.268467929                        | 9         | 38         | 4                 | 20183                 | <i>HLA-B,TAP1,TAP2,HLA-C</i>          |
| GO:MF  | peptide antigen binding                       | GO:0042605 | 1.66E-06         | 5.780551577                        | 33        | 38         | 5                 | 20183                 | <i>HLA-B,TAP1,TAP2,HLA-DRB5,HLA-C</i> |
| GO:MF  | MHC class II protein complex binding          | GO:0023026 | 5.55E-03         | 2.255758914                        | 25        | 38         | 3                 | 20183                 | <i>HLA-DRB5,HLA-DMA,HLA-DOB</i>       |
| GO:MF  | antigen binding                               | GO:0003823 | 6.10E-03         | 2.214613818                        | 168       | 38         | 5                 | 20183                 | <i>HLA-B,TAP1,TAP2,HLA-DRB5,HLA-C</i> |
| GO:MF  | MHC protein complex binding                   | GO:0023023 | 1.30E-02         | 1.885129244                        | 33        | 38         | 3                 | 20183                 | <i>HLA-DRB5,HLA-DMA,HLA-DOB</i>       |
| GO:MF  | ABC-type peptide antigen transporter activity | GO:0015433 | 1.39E-02         | 1.857966469                        | 5         | 38         | 2                 | 20183                 | <i>TAP1,TAP2</i>                      |
| GO:MF  | ABC-type peptide transporter activity         | GO:0015440 | 1.39E-02         | 1.857966469                        | 5         | 38         | 2                 | 20183                 | <i>TAP1,TAP2</i>                      |

|       |                                                                                   |            |          |             |     |    |   |       |                                                                |
|-------|-----------------------------------------------------------------------------------|------------|----------|-------------|-----|----|---|-------|----------------------------------------------------------------|
| GO:MF | MHC class Ib protein binding                                                      | GO:0023029 | 2.08E-02 | 1.682391823 | 6   | 38 | 2 | 20183 | <i>TAP1,TAP2</i>                                               |
| GO:MF | TAP1 binding                                                                      | GO:0046978 | 2.08E-02 | 1.682391823 | 6   | 38 | 2 | 20183 | <i>TAP1,TAP2</i>                                               |
| GO:BP | antigen processing and presentation                                               | GO:0019882 | 1.06E-07 | 6.97304123  | 128 | 38 | 8 | 21100 | <i>HLA-B,TAP1,HLA-DQB1,TAP2,HLA-DRB5,HLA-DMA,HLA-C,HLA-DOB</i> |
| GO:BP | antigen processing and presentation of peptide antigen                            | GO:0048002 | 2.03E-07 | 6.691437058 | 82  | 38 | 7 | 21100 | <i>HLA-B,TAP1,TAP2,HLA-DRB5,HLA-DMA,HLA-C,HLA-DOB</i>          |
| GO:BP | antigen processing and presentation of exogenous peptide antigen                  | GO:0002478 | 1.63E-06 | 5.786658773 | 59  | 38 | 6 | 21100 | <i>HLA-B,TAP1,HLA-DRB5,HLA-DMA,HLA-C,HLA-DOB</i>               |
| GO:BP | antigen processing and presentation of exogenous antigen                          | GO:0019884 | 4.69E-06 | 5.32899095  | 70  | 38 | 6 | 21100 | <i>HLA-B,TAP1,HLA-DRB5,HLA-DMA,HLA-C,HLA-DOB</i>               |
| GO:BP | antigen processing and presentation of endogenous peptide antigen via MHC class I | GO:0019885 | 1.09E-05 | 4.962814961 | 13  | 38 | 4 | 21100 | <i>HLA-B,TAP1,TAP2,HLA-C</i>                                   |
| GO:BP | antigen processing and presentation of endogenous peptide antigen                 | GO:0002483 | 5.86E-05 | 4.232098574 | 19  | 38 | 4 | 21100 | <i>HLA-B,TAP1,TAP2,HLA-C</i>                                   |
| GO:BP | antigen processing and presentation of endogenous antigen                         | GO:0019883 | 2.24E-04 | 3.649762339 | 26  | 38 | 4 | 21100 | <i>HLA-B,TAP1,TAP2,HLA-C</i>                                   |
| GO:BP | positive regulation of apoptotic cell clearance                                   | GO:2000427 | 5.17E-04 | 3.286441059 | 8   | 38 | 3 | 21100 | <i>C4B,C2,C4A</i>                                              |
| GO:BP | antigen processing and                                                            | GO:0002504 | 8.71E-04 | 3.059852366 | 36  | 38 | 4 | 21100 | <i>HLA-DQB1,HLA-DRB5,HLA-DMA,HLA-DOB</i>                       |

|       |                                                                                   |            |          |             |    |    |   |       |                                 |
|-------|-----------------------------------------------------------------------------------|------------|----------|-------------|----|----|---|-------|---------------------------------|
|       | presentation of peptide or polysaccharide antigen via MHC class II                |            |          |             |    |    |   |       |                                 |
| GO:BP | regulation of apoptotic cell clearance                                            | GO:2000425 | 1.11E-03 | 2.956528988 | 10 | 38 | 3 | 21100 | <i>C4B,C2,C4A</i>               |
| GO:BP | antigen processing and presentation of peptide antigen via MHC class I            | GO:0002474 | 3.08E-03 | 2.511202794 | 49 | 38 | 4 | 21100 | <i>HLA-B,TAP1,TAP2,HLA-C</i>    |
| GO:BP | MHC class II protein complex assembly                                             | GO:0002399 | 3.34E-03 | 2.476770851 | 14 | 38 | 3 | 21100 | <i>HLA-DRB5,HLA-DMA,HLA-DOB</i> |
| GO:BP | peptide antigen assembly with MHC class II protein complex                        | GO:0002503 | 3.34E-03 | 2.476770851 | 14 | 38 | 3 | 21100 | <i>HLA-DRB5,HLA-DMA,HLA-DOB</i> |
| GO:BP | peptide antigen assembly with MHC protein complex                                 | GO:0002501 | 7.44E-03 | 2.128343684 | 18 | 38 | 3 | 21100 | <i>HLA-DRB5,HLA-DMA,HLA-DOB</i> |
| GO:BP | MHC protein complex assembly                                                      | GO:0002396 | 7.44E-03 | 2.128343684 | 18 | 38 | 3 | 21100 | <i>HLA-DRB5,HLA-DMA,HLA-DOB</i> |
| GO:BP | antigen processing and presentation of exogenous peptide antigen via MHC class II | GO:0019886 | 2.95E-02 | 1.530092236 | 28 | 38 | 3 | 21100 | <i>HLA-DRB5,HLA-DMA,HLA-DOB</i> |
| GO:BP | antigen processing and presentation of peptide antigen via MHC class II           | GO:0002495 | 4.45E-02 | 1.352114671 | 32 | 38 | 3 | 21100 | <i>HLA-DRB5,HLA-DMA,HLA-DOB</i> |
| GO:BP | antigen processing and presentation of exogenous                                  | GO:0042590 | 4.45E-02 | 1.352114671 | 32 | 38 | 3 | 21100 | <i>HLA-B,TAP1,HLA-C</i>         |

|       |                                                                      |            |          |             |     |    |   |       |                                                      |
|-------|----------------------------------------------------------------------|------------|----------|-------------|-----|----|---|-------|------------------------------------------------------|
|       | peptide antigen via MHC class I                                      |            |          |             |     |    |   |       |                                                      |
| GO:CC | MHC protein complex                                                  | GO:0042611 | 9.26E-10 | 9.033262067 | 24  | 41 | 6 | 21698 | <i>HLA-B,HLA-DQB1,HLA-DRB5,HLA-DMA,HLA-C,HLA-DOB</i> |
| GO:CC | integral component of endoplasmic reticulum membrane                 | GO:0030176 | 4.89E-06 | 5.310655198 | 163 | 41 | 7 | 21698 | <i>ATF6B,HLA-B,TAP1,TAP2,HLA-DRB5,HLA-C,CREB3</i>    |
| GO:CC | MHC class II protein complex                                         | GO:0042613 | 5.83E-06 | 5.234450139 | 17  | 41 | 4 | 21698 | <i>HLA-DQB1,HLA-DRB5,HLA-DMA,HLA-DOB</i>             |
| GO:CC | intrinsic component of endoplasmic reticulum membrane                | GO:0031227 | 6.81E-06 | 5.167090679 | 171 | 41 | 7 | 21698 | <i>ATF6B,HLA-B,TAP1,TAP2,HLA-DRB5,HLA-C,CREB3</i>    |
| GO:CC | phagocytic vesicle membrane                                          | GO:0030670 | 3.05E-03 | 2.515190292 | 77  | 41 | 4 | 21698 | <i>HLA-B,TAP1,TAP2,HLA-C</i>                         |
| GO:CC | luminal side of endoplasmic reticulum membrane                       | GO:0098553 | 3.18E-03 | 2.497568361 | 25  | 41 | 3 | 21698 | <i>HLA-B,HLA-DRB5,HLA-C</i>                          |
| GO:CC | integral component of luminal side of endoplasmic reticulum membrane | GO:0071556 | 3.18E-03 | 2.497568361 | 25  | 41 | 3 | 21698 | <i>HLA-B,HLA-DRB5,HLA-C</i>                          |
| GO:CC | luminal side of membrane                                             | GO:0098576 | 6.80E-03 | 2.167805645 | 32  | 41 | 3 | 21698 | <i>HLA-B,HLA-DRB5,HLA-C</i>                          |
| GO:CC | endocytic vesicle membrane                                           | GO:0030666 | 6.94E-03 | 2.15851091  | 193 | 41 | 5 | 21698 | <i>HLA-B,TAP1,TAP2,HLA-DRB5,HLA-C</i>                |
| GO:CC | MHC class I protein complex                                          | GO:0042612 | 2.20E-02 | 1.657393853 | 8   | 41 | 2 | 21698 | <i>HLA-B,HLA-C</i>                                   |
| GO:CC | MHC class I peptide loading complex                                  | GO:0042824 | 2.83E-02 | 1.548769783 | 9   | 41 | 2 | 21698 | <i>TAP1,TAP2</i>                                     |
| GO:CC | phagocytic vesicle                                                   | GO:0045335 | 3.17E-02 | 1.498324979 | 140 | 41 | 4 | 21698 | <i>HLA-B,TAP1,TAP2,HLA-C</i>                         |

|       |                                              |            |          |             |     |    |   |       |                                                                       |
|-------|----------------------------------------------|------------|----------|-------------|-----|----|---|-------|-----------------------------------------------------------------------|
| GO:CC | ER to Golgi transport vesicle membrane       | GO:0012507 | 3.88E-02 | 1.411255094 | 57  | 41 | 3 | 21698 | <i>HLA-B,HLA-DRB5,HLA-C</i>                                           |
| KEGG  | Antigen processing and presentation          | KEGG:04612 | 9.08E-12 | 11.04186369 | 67  | 23 | 9 | 7559  | <i>HLA-B,TAP1,HLA-DQB1,TAP2,HLA-DRB5,HLA-DMA,HLA-C,HSPA1B,HLA-DOB</i> |
| KEGG  | Type I diabetes mellitus                     | KEGG:04940 | 9.75E-10 | 9.0109275   | 40  | 23 | 7 | 7559  | <i>LTA,HLA-B,HLA-DQB1,HLA-DRB5,HLA-DMA,HLA-C,HLA-DOB</i>              |
| KEGG  | Allograft rejection                          | KEGG:05330 | 3.15E-08 | 7.50197038  | 34  | 23 | 6 | 7559  | <i>HLA-B,HLA-DQB1,HLA-DRB5,HLA-DMA,HLA-C,HLA-DOB</i>                  |
| KEGG  | Graft-versus-host disease                    | KEGG:05332 | 5.41E-08 | 7.266800544 | 37  | 23 | 6 | 7559  | <i>HLA-B,HLA-DQB1,HLA-DRB5,HLA-DMA,HLA-C,HLA-DOB</i>                  |
| KEGG  | Staphylococcus aureus infection              | KEGG:05150 | 2.18E-07 | 6.661046859 | 84  | 23 | 7 | 7559  | <i>C4B,C2,HLA-DQB1,HLA-DRB5,HLA-DMA,C4A,HLA-DOB</i>                   |
| KEGG  | Phagosome                                    | KEGG:04145 | 2.34E-07 | 6.630580746 | 137 | 23 | 8 | 7559  | <i>HLA-B,TAP1,HLA-DQB1,TAP2,HLA-DRB5,HLA-DMA,HLA-C,HLA-DOB</i>        |
| KEGG  | Autoimmune thyroid disease                   | KEGG:05320 | 3.18E-07 | 6.497649078 | 49  | 23 | 6 | 7559  | <i>HLA-B,HLA-DQB1,HLA-DRB5,HLA-DMA,HLA-C,HLA-DOB</i>                  |
| KEGG  | Viral myocarditis                            | KEGG:05416 | 6.52E-07 | 6.186080647 | 55  | 23 | 6 | 7559  | <i>HLA-B,HLA-DQB1,HLA-DRB5,HLA-DMA,HLA-C,HLA-DOB</i>                  |
| KEGG  | Epstein-Barr virus infection                 | KEGG:05169 | 3.22E-06 | 5.492245568 | 191 | 23 | 8 | 7559  | <i>HLA-B,TAP1,HLA-DQB1,TAP2,HLA-DRB5,HLA-DMA,HLA-C,HLA-DOB</i>        |
| KEGG  | Systemic lupus erythematosus                 | KEGG:05322 | 3.97E-06 | 5.400909694 | 127 | 23 | 7 | 7559  | <i>C4B,C2,HLA-DQB1,HLA-DRB5,HLA-DMA,C4A,HLA-DOB</i>                   |
| KEGG  | Human T-cell leukemia virus 1 infection      | KEGG:05166 | 6.99E-06 | 5.155703396 | 211 | 23 | 8 | 7559  | <i>LTA,ATF6B,HLA-B,HLA-DQB1,HLA-DRB5,HLA-DMA,HLA-C,HLA-DOB</i>        |
| KEGG  | Asthma                                       | KEGG:05310 | 6.91E-05 | 4.160615271 | 27  | 23 | 4 | 7559  | <i>HLA-DQB1,HLA-DRB5,HLA-DMA,HLA-DOB</i>                              |
| KEGG  | Cell adhesion molecules                      | KEGG:04514 | 2.02E-04 | 3.694105123 | 143 | 23 | 6 | 7559  | <i>HLA-B,HLA-DQB1,HLA-DRB5,HLA-DMA,HLA-C,HLA-DOB</i>                  |
| KEGG  | Intestinal immune network for IgA production | KEGG:04672 | 5.16E-04 | 3.287029975 | 44  | 23 | 4 | 7559  | <i>HLA-DQB1,HLA-DRB5,HLA-DMA,HLA-DOB</i>                              |
| KEGG  | Toxoplasmosis                                | KEGG:05145 | 9.00E-04 | 3.045979924 | 107 | 23 | 5 | 7559  | <i>HLA-DQB1,HLA-DRB5,HLA-DMA,HSPA1B,HLA-DOB</i>                       |
| KEGG  | Inflammatory bowel disease                   | KEGG:05321 | 1.92E-03 | 2.717109834 | 61  | 23 | 4 | 7559  | <i>HLA-DQB1,HLA-DRB5,HLA-DMA,HLA-DOB</i>                              |
| KEGG  | Leishmaniasis                                | KEGG:05140 | 3.50E-03 | 2.455916118 | 71  | 23 | 4 | 7559  | <i>HLA-DQB1,HLA-DRB5,HLA-DMA,HLA-DOB</i>                              |
| KEGG  | Th1 and Th2 cell differentiation             | KEGG:04658 | 7.42E-03 | 2.129498764 | 86  | 23 | 4 | 7559  | <i>HLA-DQB1,HLA-DRB5,HLA-DMA,HLA-DOB</i>                              |

|      |                                                                            |                    |          |             |     |    |   |       |                                                                 |
|------|----------------------------------------------------------------------------|--------------------|----------|-------------|-----|----|---|-------|-----------------------------------------------------------------|
| KEGG | Rheumatoid arthritis                                                       | KEGG:05323         | 7.42E-03 | 2.129498764 | 86  | 23 | 4 | 7559  | <i>HLA-DQB1,HLA-DRB5,HLA-DMA,HLA-DOB</i>                        |
| KEGG | Hematopoietic cell lineage                                                 | KEGG:04640         | 9.25E-03 | 2.033998883 | 91  | 23 | 4 | 7559  | <i>HLA-DQB1,HLA-DRB5,HLA-DMA,HLA-DOB</i>                        |
| KEGG | Th17 cell differentiation                                                  | KEGG:04659         | 1.55E-02 | 1.809758537 | 104 | 23 | 4 | 7559  | <i>HLA-DQB1,HLA-DRB5,HLA-DMA,HLA-DOB</i>                        |
| KEGG | Human cytomegalovirus infection                                            | KEGG:05163         | 2.49E-02 | 1.603892015 | 215 | 23 | 5 | 7559  | <i>ATF6B,HLA-B,TAP1,TAP2,HLA-C</i>                              |
| REAC | Antigen Presentation: Folding, assembly and peptide loading of class I MHC | REAC:R-HSA-983170  | 6.88E-05 | 4.162432156 | 25  | 24 | 4 | 10770 | <i>HLA-B,TAP1,TAP2,HLA-C</i>                                    |
| REAC | Activation of C3 and C5                                                    | REAC:R-HSA-174577  | 1.00E-04 | 3.999555945 | 7   | 24 | 3 | 10770 | <i>C4B,C2,C4A</i>                                               |
| REAC | ER-Phagosome pathway                                                       | REAC:R-HSA-1236974 | 1.26E-02 | 1.899115798 | 90  | 24 | 4 | 10770 | <i>HLA-B,TAP1,TAP2,HLA-C</i>                                    |
| REAC | Antigen processing-Cross presentation                                      | REAC:R-HSA-1236975 | 2.39E-02 | 1.620732475 | 106 | 24 | 4 | 10770 | <i>HLA-B,TAP1,TAP2,HLA-C</i>                                    |
| WP   | Allograft rejection                                                        | WP:WP2328          | 5.88E-10 | 9.230469745 | 86  | 25 | 9 | 7364  | <i>C4B,C2,HLA-B,HLA-DQB1,HLA-DRB5,HLA-DMA,C4A,HLA-C,HLA-DOB</i> |
| WP   | Ebola virus infection in host                                              | WP:WP4217          | 3.84E-04 | 3.415220066 | 126 | 25 | 6 | 7364  | <i>HLA-B,HLA-DQB1,HLA-DRB5,HLA-DMA,HLA-C,HLA-DOB</i>            |
| WP   | Complement activation                                                      | WP:WP545           | 5.62E-03 | 2.250392449 | 21  | 25 | 3 | 7364  | <i>C4B,C2,C4A</i>                                               |
| TF   | Factor: slug; motif: RRCAGGTGCA; match class: 1                            | TF:M12260_1        | 4.59E-02 | 1.338505383 | 27  | 40 | 3 | 19958 | <i>LY6G6C,C6ORF25,NEU1</i>                                      |
| HPA  | appendix; non-germinal center cells[High]                                  | HPA:0030443        | 5.29E-03 | 2.276740776 | 105 | 20 | 4 | 10976 | <i>FOXP1,HLA-B,HLA-DQB1,HLA-DMA</i>                             |

**Supplementary Table S18.** Pathways associated with headache and TSH.

| source | term_name                                                                         | term_id    | adjusted_p_value | negative_log10_of_adjusted_p_value | term_size | query_size | intersection_size | effective_domain_size | intersections                                       |
|--------|-----------------------------------------------------------------------------------|------------|------------------|------------------------------------|-----------|------------|-------------------|-----------------------|-----------------------------------------------------|
| GO:MF  | TAP binding                                                                       | GO:0046977 | 4.80E-05         | 4.318441367                        | 9         | 100        | 4                 | 20183                 | <i>HLA-C,TAP1,TAP2,HLA-B</i>                        |
| GO:MF  | peptide antigen binding                                                           | GO:0042605 | 3.93E-04         | 3.405555991                        | 33        | 100        | 5                 | 20183                 | <i>HLA-C,TAP1,TAP2,HLA-DRB1,HLA-B</i>               |
| GO:MF  | complement binding                                                                | GO:0001848 | 1.77E-03         | 2.75171302                         | 20        | 100        | 4                 | 20183                 | <i>CFB,C4B,C4A,PHB</i>                              |
| GO:BP  | antigen processing and presentation of endogenous peptide antigen                 | GO:0002483 | 5.18E-05         | 4.285405765                        | 19        | 100        | 5                 | 21100                 | <i>HLA-C,TAP1,TAP2,HLA-DRB1,HLA-B</i>               |
| GO:BP  | antigen processing and presentation of peptide antigen                            | GO:0048002 | 2.68E-04         | 3.571369816                        | 82        | 100        | 7                 | 21100                 | <i>HLA-C,TAP1,TAP2,PSMB9,HLA-DRB1,HLA-DOB,HLA-B</i> |
| GO:BP  | antigen processing and presentation of endogenous antigen                         | GO:0019883 | 2.86E-04         | 3.54423411                         | 26        | 100        | 5                 | 21100                 | <i>HLA-C,TAP1,TAP2,HLA-DRB1,HLA-B</i>               |
| GO:BP  | antigen processing and presentation of endogenous peptide antigen via MHC class I | GO:0019885 | 7.14E-04         | 3.14607405                         | 13        | 100        | 4                 | 21100                 | <i>HLA-C,TAP1,TAP2,HLA-B</i>                        |
| GO:BP  | antigen processing and presentation of exogenous peptide antigen                  | GO:0002478 | 7.78E-04         | 3.108745394                        | 59        | 100        | 6                 | 21100                 | <i>HLA-C,TAP1,PSMB9,HLA-DRB1,HLA-DOB,HLA-B</i>      |
| GO:BP  | antigen processing and presentation of exogenous antigen                          | GO:0019884 | 2.17E-03         | 2.66309584                         | 70        | 100        | 6                 | 21100                 | <i>HLA-C,TAP1,PSMB9,HLA-DRB1,HLA-DOB,HLA-B</i>      |

|       |                                                                                  |            |          |             |     |     |   |       |                                                             |
|-------|----------------------------------------------------------------------------------|------------|----------|-------------|-----|-----|---|-------|-------------------------------------------------------------|
| GO:BP | antigen processing and presentation                                              | GO:0019882 | 5.59E-03 | 2.252858946 | 128 | 100 | 7 | 21100 | <i>HLA-C,TAP1,TAP2,PSMB9,HLA-DRB1,HLA-DOB,HLA-B</i>         |
| GO:BP | antigen processing and presentation of peptide antigen via MHC class I           | GO:0002474 | 7.59E-03 | 2.119478045 | 49  | 100 | 5 | 21100 | <i>HLA-C,TAP1,TAP2,PSMB9,HLA-B</i>                          |
| GO:BP | antigen processing and presentation of exogenous peptide antigen via MHC class I | GO:0042590 | 3.35E-02 | 1.47459321  | 32  | 100 | 4 | 21100 | <i>HLA-C,TAP1,PSMB9,HLA-B</i>                               |
| GO:CC | MHC protein complex                                                              | GO:0042611 | 1.62E-03 | 2.791324502 | 24  | 104 | 4 | 21698 | <i>HLA-C,HLA-DRB1,HLA-DOB,HLA-B</i>                         |
| KEGG  | Antigen processing and presentation                                              | KEGG:04612 | 1.59E-05 | 4.798519832 | 67  | 49  | 7 | 7559  | <i>HLA-C,TAP1,TAP2,TNF,HLA-DRB1,HLA-DOB,HLA-B</i>           |
| KEGG  | Allograft rejection                                                              | KEGG:05330 | 1.79E-04 | 3.748044795 | 34  | 49  | 5 | 7559  | <i>HLA-C,TNF,HLA-DRB1,HLA-DOB,HLA-B</i>                     |
| KEGG  | Graft-versus-host disease                                                        | KEGG:05332 | 2.76E-04 | 3.559439474 | 37  | 49  | 5 | 7559  | <i>HLA-C,TNF,HLA-DRB1,HLA-DOB,HLA-B</i>                     |
| KEGG  | Type I diabetes mellitus                                                         | KEGG:04940 | 4.10E-04 | 3.38692559  | 40  | 49  | 5 | 7559  | <i>HLA-C,TNF,HLA-DRB1,HLA-DOB,HLA-B</i>                     |
| KEGG  | Rheumatoid arthritis                                                             | KEGG:05323 | 1.37E-03 | 2.863739371 | 86  | 49  | 6 | 7559  | <i>CTSK,TNF,LTB,HLA-DRB1,HLA-DOB,TGFB3</i>                  |
| KEGG  | Epstein-Barr virus infection                                                     | KEGG:05169 | 2.12E-03 | 2.673622433 | 191 | 49  | 8 | 7559  | <i>STAT1,HLA-C,TAP1,TAP2,TNF,HLA-DRB1,HLA-DOB,HLA-B</i>     |
| KEGG  | Inflammatory bowel disease                                                       | KEGG:05321 | 3.35E-03 | 2.475017815 | 61  | 49  | 5 | 7559  | <i>STAT1,TNF,HLA-DRB1,HLA-DOB,TGFB3</i>                     |
| KEGG  | Human T-cell leukemia virus 1 infection                                          | KEGG:05166 | 4.33E-03 | 2.36388739  | 211 | 49  | 8 | 7559  | <i>CDKN2C,HLA-C,TNF,HLA-DRB1,HLA-DOB,HLA-B,MAD1L1,TGFB3</i> |
| KEGG  | Leishmaniasis                                                                    | KEGG:05140 | 6.98E-03 | 2.155955395 | 71  | 49  | 5 | 7559  | <i>STAT1,TNF,HLA-DRB1,HLA-DOB,TGFB3</i>                     |
| KEGG  | Staphylococcus aureus infection                                                  | KEGG:05150 | 1.55E-02 | 1.808403967 | 84  | 49  | 5 | 7559  | <i>CFB,C4B,HLA-DRB1,C4A,HLA-DOB</i>                         |
| KEGG  | Phagosome                                                                        | KEGG:04145 | 1.86E-02 | 1.72960932  | 137 | 49  | 6 | 7559  | <i>HLA-C,TAP1,TAP2,HLA-DRB1,HLA-DOB,HLA-B</i>               |
| KEGG  | Autoimmune thyroid disease                                                       | KEGG:05320 | 2.12E-02 | 1.673282139 | 49  | 49  | 4 | 7559  | <i>HLA-C,HLA-DRB1,HLA-DOB,HLA-B</i>                         |



|      |                                                                            |                   |          |             |     |    |   |       |                                                       |
|------|----------------------------------------------------------------------------|-------------------|----------|-------------|-----|----|---|-------|-------------------------------------------------------|
| KEGG | Coronavirus disease - COVID-19                                             | KEGG:05171        | 2.69E-02 | 1.570909392 | 207 | 49 | 7 | 7559  | <i>STAT1,CFB,C4B,TNF,C4A,RPL6,RPL27</i>               |
| KEGG | Viral myocarditis                                                          | KEGG:05416        | 3.32E-02 | 1.478928742 | 55  | 49 | 4 | 7559  | <i>HLA-C,HLA-DRB1,HLA-DOB,HLA-B</i>                   |
| KEGG | Toxoplasmosis                                                              | KEGG:05145        | 4.79E-02 | 1.319850144 | 107 | 49 | 5 | 7559  | <i>STAT1,TNF,HLA-DRB1,HLA-DOB,TGFB3</i>               |
| REAC | Activation of C3 and C5                                                    | REAC:R-HSA-174577 | 2.65E-03 | 2.577121079 | 7   | 63 | 3 | 10770 | <i>CFB,C4B,C4A</i>                                    |
| REAC | Antigen Presentation: Folding, assembly and peptide loading of class I MHC | REAC:R-HSA-983170 | 4.95E-03 | 2.305797809 | 25  | 63 | 4 | 10770 | <i>HLA-C,TAP1,TAP2,HLA-B</i>                          |
| WP   | Allograft rejection                                                        | WP:WP2328         | 2.75E-05 | 4.560348973 | 86  | 55 | 8 | 7364  | <i>STAT1,HLA-C,C4B,TNF,HLA-DRB1,C4A,HLA-DOB,HLA-B</i> |
| WP   | Type II interferon signaling                                               | WP:WP619          | 8.67E-04 | 3.062002411 | 36  | 55 | 5 | 7364  | <i>STAT1,TAP1,PSMB9,HLA-B,PTPN11</i>                  |
| HP   | Decreased serum complement C4                                              | HP:0045042        | 2.20E-02 | 1.657953867 | 7   | 38 | 3 | 4508  | <i>C4B,C4A,SERPING1</i>                               |
| HP   | Unusual infection by anatomical site                                       | HP:0032158        | 2.79E-02 | 1.554400479 | 107 | 38 | 7 | 4508  | <i>STAT1,CFB,C4B,HLA-DRB1,C4A,HLA-B,MVK</i>           |

**Supplementary Table S19.** Pathways associated with headache and fT4.

| source | term_name                                      | term_id    | adjusted_p_value | negative_log10_of_adjusted_p_value | term_size | query_size | intersection_size | effective_domain_size | intersections                  |
|--------|------------------------------------------------|------------|------------------|------------------------------------|-----------|------------|-------------------|-----------------------|--------------------------------|
| GO:MF  | sialic acid transmembrane transporter activity | GO:0015136 | 8.38E-04         | 3.076646377                        | 5         | 105        | 3                 | 20183                 | <i>SLC17A4,SLC17A1,SLC17A2</i> |
| GO:MF  | sodium:phosphate symporter activity            | GO:0005436 | 1.35E-02         | 1.869049782                        | 11        | 105        | 3                 | 20183                 | <i>SLC17A4,SLC17A1,SLC17A2</i> |
| GO:BP  | sialic acid transport                          | GO:0015739 | 2.35E-03         | 2.628446438                        | 5         | 106        | 3                 | 21100                 | <i>SLC17A4,SLC17A1,SLC17A2</i> |
| GO:BP  | positive regulation of                         | GO:2000427 | 1.30E-02         | 1.885034901                        | 8         | 106        | 3                 | 21100                 | <i>C4B,C2,C4A</i>              |

|       |                                                                 |                    |          |             |     |     |   |       |                                                                     |
|-------|-----------------------------------------------------------------|--------------------|----------|-------------|-----|-----|---|-------|---------------------------------------------------------------------|
|       | apoptotic cell clearance                                        |                    |          |             |     |     |   |       |                                                                     |
| GO:BP | regulation of apoptotic cell clearance                          | GO:2000425         | 2.77E-02 | 1.557224348 | 10  | 106 | 3 | 21100 | <i>C4B,C2,C4A</i>                                                   |
| KEGG  | Systemic lupus erythematosus                                    | KEGG:05322         | 1.23E-05 | 4.91151414  | 127 | 38  | 8 | 7559  | <i>HIST1H2AC,TNF,C4B,HIST1H4J,C2,HIST1H2BN,HIST1H2BD,C4A</i>        |
| KEGG  | Coronavirus disease - COVID-19                                  | KEGG:05171         | 3.91E-02 | 1.407377393 | 207 | 38  | 6 | 7559  | <i>TNF,C4B,CFB,C2,C4A,CHUK</i>                                      |
| KEGG  | Pertussis                                                       | KEGG:05133         | 4.04E-02 | 1.393392048 | 76  | 38  | 4 | 7559  | <i>TNF,C4B,C2,C4A</i>                                               |
| KEGG  | Human T-cell leukemia virus 1 infection                         | KEGG:05166         | 4.33E-02 | 1.363258403 | 211 | 38  | 6 | 7559  | <i>CDKN2C,LTA,TNF,ATF6B,HLA-B,CHUK</i>                              |
| KEGG  | Alcoholic liver disease                                         | KEGG:04936         | 4.84E-02 | 1.315450686 | 141 | 38  | 5 | 7559  | <i>TNF,C4B,C2,C4A,CHUK</i>                                          |
| REAC  | Activation of C3 and C5                                         | REAC:R-HSA-174577  | 7.21E-06 | 5.14184651  | 7   | 55  | 4 | 10770 | <i>C4B,CFB,C2,C4A</i>                                               |
| REAC  | Senescence-Associated Secretory Phenotype (SASP)                | REAC:R-HSA-2559582 | 7.25E-03 | 2.139606019 | 112 | 55  | 6 | 10770 | <i>CDKN2C,HIST1H2AC,EHMT2,HIST1H4J,HIST1H2BN,HIST1H2BD</i>          |
| REAC  | Defective pyroptosis                                            | REAC:R-HSA-9710421 | 1.14E-02 | 1.943168931 | 73  | 55  | 5 | 10770 | <i>HIST1H2AC,HIST1H4J,HIST1H2BN,HIST1H2BD,PRIM1</i>                 |
| REAC  | ERCC6 (CSB) and EHMT2 (G9a) positively regulate rRNA expression | REAC:R-HSA-427389  | 1.39E-02 | 1.858308075 | 76  | 55  | 5 | 10770 | <i>HIST1H2AC,EHMT2,HIST1H4J,HIST1H2BN,HIST1H2BD</i>                 |
| REAC  | DNA Damage/Telomere Stress Induced Senescence                   | REAC:R-HSA-2559586 | 1.78E-02 | 1.750673378 | 80  | 55  | 5 | 10770 | <i>HIST1H2AC,HIST1H4J,HIST1H2BN,HIST1H2BD,HIST1H1E</i>              |
| REAC  | Cellular Senescence                                             | REAC:R-HSA-2559583 | 1.91E-02 | 1.719492354 | 195 | 55  | 7 | 10770 | <i>CDKN2C,HIST1H2AC,EHMT2,HIST1H4J,HIST1H2BN,HIST1H2BD,HIST1H1E</i> |

|      |                               |                       |          |             |    |    |   |       |                                               |
|------|-------------------------------|-----------------------|----------|-------------|----|----|---|-------|-----------------------------------------------|
| REAC | Packaging Of<br>Telomere Ends | REAC:R-<br>HSA-171306 | 4.71E-02 | 1.327434054 | 52 | 55 | 4 | 10770 | <i>HIST1H2AC,HIST1H4J,HIST1H2BN,HIST1H2BD</i> |
| WP   | Complement<br>activation      | WP:WP545              | 1.41E-03 | 2.85002153  | 21 | 50 | 4 | 7364  | <i>C4B,CFB,C2,C4A</i>                         |
| WP   | Allograft rejection           | WP:WP2328             | 3.70E-02 | 1.431779931 | 86 | 50 | 5 | 7364  | <i>TNF,C4B,C2,HLA-B,C4A</i>                   |
